# Supplementary material for: Comparison of two malnutrition risk screening tools with nutritional biochemical parameters, BMI and length of stay in Chinese geriatric inpatients: a multicenter, cross-sectional study
Source: PubMed Central journal article supplement — BMJ Open. 2019 Feb 8;9(2):e022993. doi: 10.1136/bmjopen-2018-022993 (PMC6411257; doi:10.1136/bmjopen-2018-022993), 2019-02-08
Supplement: bmjopen-2018-022993.draft_revisions.pdf [file bmjopen-2018-022993.draft_revisions.pdf]

# BMJ Open

BMJ Open is committed to open peer review. As part of this commitment we make the peer review history of every article we publish publicly available.

When an article is published we post the peer reviewers' comments and the authors' responses online. We also post the versions of the paper that were used during peer review. These are the versions that the peer review comments apply to.

The versions of the paper that follow are the versions that were submitted during the peer review process. They are not the versions of record or the final published versions. They should not be cited or distributed as the published version of this manuscript.

BMJ Open is an open access journal and the full, final, typeset and author-corrected version of record of the manuscript is available on our site with no access controls, subscription charges or pay-per-view fees (<http://bmjopen.bmj.com>).

If you have any questions on BMJ Open's open peer review process please email [info.bmjopen@bmj.com](mailto:info.bmjopen@bmj.com)

# BMJ Open

## Comparison of two malnutrition risk screening tools with nutritional biochemical parameters in Chinese geriatric inpatients: a multicenter, cross-sectional study

|                               |                                                                                                                                                                                                                                                                                                                                                                                                                                                                                                                                                                                                                                                                                                                                                                                                                                                                                                                                                                                                                                                                                                                                                                                                    |
|-------------------------------|----------------------------------------------------------------------------------------------------------------------------------------------------------------------------------------------------------------------------------------------------------------------------------------------------------------------------------------------------------------------------------------------------------------------------------------------------------------------------------------------------------------------------------------------------------------------------------------------------------------------------------------------------------------------------------------------------------------------------------------------------------------------------------------------------------------------------------------------------------------------------------------------------------------------------------------------------------------------------------------------------------------------------------------------------------------------------------------------------------------------------------------------------------------------------------------------------|
| Journal:                      | <i>BMJ Open</i>                                                                                                                                                                                                                                                                                                                                                                                                                                                                                                                                                                                                                                                                                                                                                                                                                                                                                                                                                                                                                                                                                                                                                                                    |
| Manuscript ID                 | bmjopen-2018-022993                                                                                                                                                                                                                                                                                                                                                                                                                                                                                                                                                                                                                                                                                                                                                                                                                                                                                                                                                                                                                                                                                                                                                                                |
| Article Type:                 | Research                                                                                                                                                                                                                                                                                                                                                                                                                                                                                                                                                                                                                                                                                                                                                                                                                                                                                                                                                                                                                                                                                                                                                                                           |
| Date Submitted by the Author: | 16-Mar-2018                                                                                                                                                                                                                                                                                                                                                                                                                                                                                                                                                                                                                                                                                                                                                                                                                                                                                                                                                                                                                                                                                                                                                                                        |
| Complete List of Authors:     | Miao, Jian-Ping; Tongji Hospital of Tongji Medical College of Huazhong University of Science and Technology, Department of Geriatrics<br>Quan, Xiao-Qing; Tongji Hospital of Tongji Medical College of Huazhong University of Science and Technology, Department of Geriatrics<br>Zhang, Cun-Tai; Tongji Hospital of Tongji Medical College of Huazhong University of Science and Technology, Department of Geriatrics<br>Zhu, Hong; the Central Hospital of Wuhan University, Department of Geriatrics<br>Ye, Mei; Zhongnan Hospital of Wuhan University, Department of Geriatrics<br>Shen, Li-Ya; Wuhan No. 6 Hospital, Department of Geriatrics<br>Guo, Qiu-Hui; Wuhan No. 6 Hospital, Department of Geriatrics<br>Zhu, Gang-Yan; Hubei General Hospital, Department of Geriatrics<br>Mei, Qi-Jian; General Hospital of the Yangtze River Shipping<br>Wu, Yan-Xia; Wuhan No 1 Hospital, Department of Geriatrics<br>Li, Shu-Guo; First Clinical Medical College, Three Gorges University & Yichang Central People's Hospital, Department of Geriatrics<br>Zhou, Hong-Lian; Tongji Hospital of Tongji Medical College of Huazhong University of Science and Technology, Department of Geriatrics |
| Keywords:                     | malnutrition risk, NRS2002, MNA, elderly                                                                                                                                                                                                                                                                                                                                                                                                                                                                                                                                                                                                                                                                                                                                                                                                                                                                                                                                                                                                                                                                                                                                                           |
|                               |                                                                                                                                                                                                                                                                                                                                                                                                                                                                                                                                                                                                                                                                                                                                                                                                                                                                                                                                                                                                                                                                                                                                                                                                    |

SCHOLARONE™  
Manuscripts

1  
2  
3 **Comparison of two malnutrition risk screening tools with nutritional**  
4 **biochemical parameters in Chinese geriatric inpatients: a multicenter,**  
5 **cross-sectional study**  
6  
7  
8  
9

10 Jian-Ping Miao<sup>1</sup>, Xiao-Qing Quan<sup>1</sup>, Cun-Tai Zhang<sup>1</sup>, Hong Zhu<sup>2</sup>, Mei Ye<sup>3</sup>,  
11 Li-Ya Shen<sup>4</sup>, Qiu-Hui Guo<sup>4</sup>, Gang-Yan Zhu<sup>5</sup>, Qi-Jian Mei<sup>6</sup>, Yan-Xia Wu<sup>7</sup>,  
12 Shu-Guo Li<sup>8</sup>, Hong-Lian Zhou<sup>1</sup>  
13  
14  
15  
16  
17  
18  
19

20 **Running title: Malnutrition risk screening in Chinese geriatric inpatients**  
21  
22

- 23 1. Department of Geriatrics, Tongji Hospital, Tongji Medical College, Huazhong  
24 University of Science and Technology, Hubei, China  
25  
26 2. Department of Geriatrics, the Central Hospital of Wuhan University, Hubei, China  
27  
28 3. Department of Geriatrics, Zhongnan Hospital of Wuhan University, Hubei, China  
29  
30 4. Department of Geriatrics, Wuhan No. 6 Hospital, Hubei, China  
31  
32 5. Department of Geriatrics, Hubei General Hospital, Hubei, China  
33  
34 6. Department of Geriatrics, General Hospital of the Yangtze River Shipping, Hubei,  
35 China  
36  
37 7. Department of Geriatrics, Wuhan No 1 Hospital, Hubei, China  
38  
39 8. Department of Geriatrics, First Clinical Medical College, Three Gorges University  
40 & Yichang Central People's Hospital, Hubei, China  
41  
42  
43  
44  
45  
46

47 JPM and XQQ contributed equally.  
48  
49  
50  
51  
52  
53

54 Correspondence to Dr Hong-Lian Zhou; zhouhonglian63@163.com  
55  
56  
57  
58  
59  
60

## ABSTRACT

**Objectives:** The aim of this study was to assess malnutrition risk in Chinese geriatric inpatients with Nutritional Risk Screening (NRS2002) and Mini-Nutritional Assessment (MNA), and to identify the most appropriate nutritional screening tool for these patients.

**Design:** Cross-sectional study.

**Setting:** Eight medical centers in Hubei province, China.

**Participants:** A total of 425 inpatients aged  $\geq 70$  years were enrolled in this study between December 2014 and May 2016.

**Primary and secondary outcome measures:** Nutritional status was assessed by NRS2002, MNA, anthropometric measurements and biochemical parameters within 24 hours of admission. Comorbidities and length of hospitalization were recorded. Nutritional parameters and length of hospital stay were used to compare MNA and NRS2002. Besides, Kappa analysis was used to evaluate the consistency of the two tools.

**Results:** The average age was  $81.16 \pm 5.89$  years (range, 70-98). The prevalence of undernutrition classified by NRS2002 and MNA was 40.94% and 58.59%, respectively. Patients with malnutrition had lower BMI, hemoglobin, albumin and prealbumin ( $P < 0.05$ ), and longer length of hospital stay (LOS) ( $P < 0.05$ ). The NRS2002 showed moderate agreement ( $\kappa = 0.521$ ,  $P < 0.001$ ) with MNA. Both tools showed significant correlation with age, BMI and laboratory parameters ( $P < 0.001$ ). In addition, a significant association between both tools and LOS was found ( $P < 0.05$ ).

1  
2  
3 **Conclusions:** The results show a relatively high prevalence of malnutrition risk in our  
4  
5  
6 sample cohort. We found NRS2002 and MNA both were suitable to screen  
7  
8 malnutrition risk among Chinese geriatric inpatients.  
9

### 10 11 12 13 14 15 16 17 **Strengths and limitations of this study**

- 18  
19 ▶ This study assessed the risk of malnutrition among Chinese elderly inpatients with  
20  
21 two different tools (NRS2002 and MNA).  
22
- 23  
24 ▶ The study provides useful information to assess the risk of malnutrition among  
25  
26 Chinese elderly inpatients.  
27
- 28  
29 ▶ Because of the lack of a gold standard for malnutrition diagnosing, we could only  
30  
31 compare two assessment scores with BMI and biochemical parameters.  
32
- 33  
34 ▶ The small sample size of women may limit the power of data analysis.  
35  
36  
37  
38  
39  
40  
41  
42  
43  
44

45 **Keywords:** Malnutrition risk, NRS2002, MNA, Elderly  
46  
47  
48  
49  
50  
51  
52  
53  
54  
55  
56  
57  
58  
59  
60

## INTRODUCTION

Malnutrition is a common condition affecting almost 13-78% of the elderly population.<sup>1</sup> It is highly associated with many adverse outcomes including frailty,<sup>2</sup> muscle wasting,<sup>3</sup> weakened immune system,<sup>4</sup> longer hospitalization,<sup>5</sup> increased morbidity<sup>6</sup> and mortality.<sup>7,8</sup> These outcomes contribute to large increases in medical expenditures.<sup>9</sup> Early identification and treatment of malnutrition can lead to better quality of life<sup>10</sup> and improved outcomes<sup>11</sup> in elderly inpatients. Therefore, the application of appropriate tools to assess the risk of malnutrition in geriatric inpatients is essential.

Nutritional risk screening and nutritional assessment tools are readily available nowadays.<sup>12</sup> These tools are used to identify patients with nutritional risk or nutritional deficiencies and to determine if intervention is needed. There are a variety of nutritional risk screening methods,<sup>13</sup> mainly involving anthropometric and biochemical parameters. However, to date, no single tool can be considered as the universal gold standard for the assessment of nutritional risk among the elderly inpatients.

The Nutritional Risk Screening (NRS2002) is recommended for hospitalized patients by the European Society of Parenteral and Enteral Nutrition (ESPEN).<sup>14</sup> It can quickly determine whether a patient needs nutritional support, especially for patients with acute complications.<sup>15,16</sup> However, NRS2002 use excludes patients who cannot be weighed or have problems of communication and the tool isn't specifically

1  
2  
3 developed for elderly inpatients.  
4  
5

6 The Mini-Nutritional Assessment (MNA) is established for the nutritional  
7 screening and assessment in the geriatrics settings.<sup>1</sup> The ESPEN recommends the use  
8 of this tool for elderly populations.<sup>17</sup> It has been shown to predict outcomes,  
9 functional status, mortality, number of hospital visits and the related healthcare costs.<sup>7,</sup>  
10  
11  
12  
13  
14  
15  
16  
17  
18  
19  
20  
21  
22  
23  
24  
25  
26  
27  
28  
29  
30  
31  
32  
33  
34  
35  
36  
37  
38  
39  
40  
41  
42  
43  
44  
45  
46  
47  
48  
49  
50  
51  
52  
53  
54  
55  
56  
57  
58  
59  
60

17-21 In contrast to the NRS2002, the MNA is more time consuming.<sup>22</sup> The NRS2002 and MNA have not been compared in their ability to predict nutritional biochemical parameters and length of hospitalization together among Chinese elderly inpatients.

A number of studies suggested serum proteins are associated with malnutrition, but the nature of this association is controversial.<sup>23-25</sup> Hemoglobin and total lymphocyte count were also proposed as useful indicators of nutritional status.<sup>24, 26</sup> The aim of our study was to assess the risk of malnutrition among Chinese elderly inpatients with two different tools (NRS2002 and MNA), to compare them in terms of nutritional biochemical parameters and length of hospital stay (LOS), and to determine the most appropriate tool for these inpatients.

## METHODS

### Study subjects

This study included 425 patients older than 70 years of age who attended geriatric department of eight hospitals in Hubei Province from December 2014 to May 2016. The eight hospitals are as follows: (1) Tongji Hospital, Tongji Medical College, Huazhong University of Science and Technology, (2) The Central Hospital of Wuhan University, (3) Zhongnan Hospital of Wuhan University, (4) Wuhan No. 6 Hospital, Affiliated Hospital of Jiangnan University, (5) Hubei General Hospital, (6) General Hospital of The Yangtze River Shipping, (7) Wuhan No. 1 Hospital, (8) The First College of Clinical Medical Science, Three Gorges University and Yichang Central People's Hospital.

This cross-sectional study received approval from the institutional Ethics Committee and all subjects signed written informed consent before participation. Inclusion criteria were: (1) age 70 years or older, (2) the patients themselves or their proxies were able to clearly answer study questions, (3) hospital stay was longer than 24 hours and (4) patients were willing to cooperate with the study. Exclusion criteria included: (1) refusal to participate in the study, (2) younger than 70 years old and (3) patients was unconscious or refused to participate in the study.

Comorbidities and length of hospitalization were obtained from medical records. Body height and weight were measured within 24 hours after admission. The body



1  
2  
3 mass index (BMI) was then calculated as weight/height squared ( $\text{kg}/\text{m}^2$ ).  
4  
5

6 Blood samples were also obtained within 24 hours after admission. Nutritional  
7  
8 biochemical parameters: serum hemoglobin (Hb), total lymphocyte count (TLC),  
9  
10 albumin (ALB) and prealbumin (PAB) were examined in the hospital's clinical  
11  
12 chemistry laboratory. Malnutrition was determined when the value of Hb was  $<120$   
13  
14  $\text{g}/\text{L}$  for males and  $<110$   $\text{g}/\text{L}$  for females. The cutoff value of ALB was 35  $\text{g}/\text{L}$  (normal  
15  
16 range 35-55  $\text{g}/\text{L}$ ), PAB was 200 $\text{mg}/\text{L}$  (normal range 200-400  $\text{mg}/\text{L}$ ), TLC was  
17  
18  $1.1 \times 10^9/\text{L}$  (normal range  $1.1$ - $3.2 \times 10^9/\text{L}$ ) for both genders for malnutrition.<sup>27</sup> Moreover,  
19  
20 based on previous research, the cutoff value of BMI was set at 20.5  $\text{kg}/\text{m}^2$  for  
21  
22 malnutrition.<sup>26</sup>  
23  
24  
25  
26  
27  
28  
29  
30  
31

### 32 **Nutritional risk screening 2002 (NRS2002)**

33  
34

35 The NRS2002 consists of the following parameters: the severity of acute illness,  
36  
37 BMI, patient appetite, accidental weight loss and patient age.<sup>15</sup> The total score ranges  
38  
39 from 0 to 7.<sup>16</sup> For investigational purposes, patients were categorized into two groups:  
40  
41 a total score  $\geq 3$  indicates under-nourished (at nutritional risk/malnourished), 0-2  
42  
43 indicates normal nutrition status.<sup>14, 28</sup> A nutritional care plan was initiated for patients  
44  
45 with a score  $\geq 3$ .<sup>28</sup>  
46  
47  
48  
49  
50  
51

### 52 **Mini-Nutritional Assessment (MNA)**

53  
54

55 The MNA consists of four parts: anthropometric assessment (0-8 points), general  
56  
57  
58  
59  
60

1  
2  
3 assessment (0-9 points), dietetic habits evaluation (0-9 points) and self-assessment of  
4 the nutrition and health status (0-4 points).<sup>29</sup> A score below 17 indicates malnutrition,  
5  
6  
7  
8 17-23.5 indicates malnutrition risk and 24-30 indicates well-nourished.<sup>1</sup>  
9

### 10 11 12 13 **Statistical analysis**

14  
15 The statistical analyses were conducted using SPSS 19.0. Data were presented as  
16 mean  $\pm$  standard deviation and ranges in blanket. The chi-square test or student's *t*-test  
17  
18 was used according to the data type. One-way analysis of variance was applied for  
19  
20 multigroup comparisons. Correlation analysis was qualified by the spearman  
21  
22 correlation test. Agreement between the two screening tools was achieved by the  
23  
24 kappa ( $\kappa$ ) statistic. The results were interpreted as follows: <0, no agreement; 0-0.19,  
25  
26 poor concordance; 0.20-0.39, fair agreement; 0.40-0.59, moderate agreement;  
27  
28 0.60-0.79, substantial agreement; and 0.80-1.00, almost perfect agreement.<sup>26</sup> The level  
29  
30 of significance was set at  $P < 0.05$ .  
31  
32  
33  
34  
35  
36  
37  
38  
39  
40  
41  
42  
43  
44  
45  
46  
47  
48  
49  
50  
51  
52  
53  
54  
55  
56  
57  
58  
59  
60

## RESULTS

Over the study period, a total of 425 individuals from the Department of Geriatrics of eight hospitals in Hubei Province met the eligibility criteria and completed a nutrition assessment within 24 hours of admission. The average age was  $81.16 \pm 5.89$  years (range, 70-98) and 31.1% were females. The average body mass index was  $23.22 \pm 3.73$  kg/m<sup>2</sup> (range, 11.09-34.14). The average length of hospitalization was  $21.86 \pm 13.75$  days (range, 4-133). The most frequent cause of hospitalization were cardiac disease, followed by pulmonary infection, hypertension, cerebrovascular diseases, digestive disease and malignancies, while the most frequent comorbidities were hypertension, diabetes mellitus, cardiac disease and cerebrovascular disease. Characteristics of study participants are shown in table 1.

According to the NRS2002, about 174 patients (40.94%) were under-nourished, 251 patients (59.06%) were at normal nutritional status. The MNA showed that 99 patients (23.29%) were malnourished, 150 patients (35.29%) were at risk of malnutrition and 176 patients (41.41%) had a normal nutritional status (table 1).

Table 2 shows the risk of undernutrition, varying from 23.66% to 58.59%, according to the different methods employed in our study. The risk of under-nourished participants classified by NRS2002, MNA, BMI, ALB, PAB, Hb, TLC were 40.94%, 58.59%, 23.66%, 28.71%, 47.30%, 36.75%, 35.90%, respectively. The risk of

malnutrition was higher in men than that of women according to hemoglobin (41.72% vs 25.58%, respectively).

Although both instruments were closely related to each other ( $P<0.001$ ), they showed substantial differences. Table 3 shows the cross-classification of MNA and NRS2002 regarding two nutritional categories. The MNA classified more patients as under-nourished than the NRS2002 (249 vs 174, respectively). Of the 249 patients classified as under-nourished by the MNA, the NRS2002 coincidentally categorized 159 as malnourished, and 90 as well-nourished.

The NRS2002, on the other hand, classified 174 patients as under-nourished. Within this group of participants, the MNA classified 159 patients as under-nourished and 15 as well-nourished. What's more, a participant considered by the MNA to be well-nourished can be classified as under-nourished using the NRS2002. The individual categorization of nutritional status showed moderate agreement between MNA and NRS2002 ( $\kappa=0.521$ ,  $P<0.001$ ).

Data of Hb, TLC, ALB and PAB concentrations are listed in tables 1 and 2. There were significant decrease of ALB, PAB, Hb and TLC in the three groups of MNA scores ( $P<0.001$  and  $P=0.023$ , figure 1a). Specifically, the group with the lowest MNA score  $<17$  ( $n=99$ ), indicating a poor nutritional state, had an average serum albumin of  $33.34\pm 4.81$  g/L (range, 22.8-43.2), an average prealbumin of  $140.82\pm 81.72$  mg/L (range, 12-339) and an average hemoglobin of  $109.04\pm 20.82$  mg/L (range, 57-150.2), an average lymphocyte count of  $1.53\pm 1.21$   $10^9$ /L (range, 0.31-6.58). In the risk of malnutrition group with an MNA score of 17-23.5 ( $n=150$ ),

1  
2  
3 average serum albumin was  $37.87 \pm 5.61$  g/L (range, 21.6-70), average prealbumin  
4  
5  
6  $192.25 \pm 61.78$  mg/L (range, 8-380) and average hemoglobin  $120.16 \pm 22.01$  mg/L  
7  
8 (range, 55-181), an average lymphocyte count of  $1.29 \pm 0.56 \times 10^9$ /L (range, 0.20-2.92).  
9  
10  
11 The group with  $MNA \geq 24$  (n=180) had an average serum albumin concentration of  
12  
13  $39.84 \pm 3.83$  g/L (range, 29.3-54), an average prealbumin of  $216.74 \pm 54.42$  mg/L (range,  
14  
15 25-337) and an average hemoglobin of  $127.59 \pm 15.32$  mg/L (range, 81-173), an  
16  
17 average lymphocyte count of  $1.51 \pm 0.69 \times 10^9$ /L (range, 0.28-4.30; figure 1a).  
18  
19

20  
21 Similarly, ALB, PAB and Hb gradually declined with increasing risk of  
22  
23 malnutrition according to NRS2002 results ( $P < 0.001$ , figure 1b). In under-nourished  
24  
25 patients (NRS2002: 3-7, n=174), average serum albumin was  $35.13 \pm 5.58$  g/L (range,  
26  
27 21.6-50.2), average prealbumin  $148.51 \pm 79.25$  mg/L (range, 17-339) and average  
28  
29 hemoglobin  $113.27 \pm 23.64$  mg/L (range, 55-181). In the normal nutritional state group  
30  
31 (NRS2002: 0-2, n=251), the results were: albumin  $39.36 \pm 4.47$  g/L (range, 26.4-70),  
32  
33 prealbumin  $210.19 \pm 56.08$  mg/L (range, 8-380) and hemoglobin  $125.80 \pm 16.16$  mg/L  
34  
35 (range, 72-173). In contrast, no difference in lymphocyte count was found in both  
36  
37 groups ( $P = 0.089$ , figure 1b).  
38  
39  
40  
41

42  
43 Table 4 showed the Pearson correlation coefficients of MNA and NRS2002  
44  
45 scores with BMI, serum parameters and LOS. BMI, Hb, ALB and PAB correlated  
46  
47 negatively with malnutrition scores of NRS2002, while correlated positively with the  
48  
49 MNA scores ( $P < 0.001$ ). There was an inverse correlation between age and the two  
50  
51 tools ( $P < 0.001$ ). Besides, a significant association between both tools and LOS was  
52  
53 demonstrated ( $P < 0.05$ ). No correlation was found between TLC and the two tools.  
54  
55  
56  
57  
58  
59  
60

## DISCUSSION

Based on the current study, the nutritional health of elderly inpatients were assessed using NRS2002, MNA, BMI, Hb, TLC, ALB and PAB. We found the overall prevalence of malnutrition risk for the enrolled elderly patients ranged from 23.66% to 58.59%. The highest prevalence of malnutrition risk was detected by MNA and the lowest by BMI. These results illustrated the differences in nutritional risk detected by different screening tools.

Biochemical markers have many advantages in assessing the nutritional status, such as fast application, low cost. They can also be incorporated into the routine of clinical application. Albumin, the most abundant plasmatic protein, is commonly used in the assessment of malnutrition.<sup>30</sup> In several of studies, low serum ALB correlated with longer hospitalization, medical complications, and increased mortality.<sup>30-32</sup> Nevertheless, its value is limited by the long half-life (14-20 days), inflammation, the impairment of hepatic or renal, and possibly aging itself.<sup>24</sup> In the present study, prevalence of malnutrition detected by ALB is lower than MNA and NRS2002, which suggest that ALB was not suitable for assessing malnutrition in our patients. In contrast, a study by Covinsky *et al*<sup>33</sup> showed ALB is highly sensitive but low specific in the diagnosis of malnutrition in the hospitalized elderly.

Prealbumin has been regarded as a more sensitive marker than albumin for acute

1  
2  
3 nutritional changes, as it has a shorter half-life (2-3 days). However, its functions in  
4 nutritional screening and mortality prediction are controversial.<sup>34-37</sup> In our study,  
5 prealbumin levels showed a great decline with deteriorating nutrition status assessed  
6 by both NRS2002 and MNA. The correlation between serum prealbumin and MNA  
7 consistent with one study,<sup>38</sup> but in contrast with another report.<sup>36</sup> This latter study had  
8 a small sample size (23 elderly patients), which may explain the discrepancies.  
9 Similar to serum albumin, the usage of prealbumin in predicting malnutrition is  
10 limited due to systemic inflammatory diseases.<sup>35, 39</sup>

11  
12 Hemoglobin has been shown to decrease with progressive malnutrition.<sup>40, 41</sup> This  
13 relationship, consistent with a recent analysis performed in Northern China,<sup>26</sup> is found  
14 in our study. Total lymphocyte count was assumed to be suitable in screening test for  
15 assessing malnutrition and being an indicator of a poor prognosis.<sup>24</sup> In agreement with  
16 Lei *et al*,<sup>42</sup> we found a significant correlation between TLC and MNA. However, no  
17 correlation was found between NRS2002 and TLC, coincidence with a previous  
18 study.<sup>26</sup>

19  
20 The prevalence of malnutrition diagnosed by BMI was far below that detected by  
21 MNA. Consistent with findings from another study,<sup>43</sup> this study suggest malnutrition  
22 is also under diagnosed when using BMI as the sole criteria. The reason is most likely  
23 related to water-sodium retention in patients, leading to an overestimation of their true  
24 weight.<sup>44</sup> In spite of this, low BMI was significantly associated with mortality.<sup>45</sup>

25  
26 Our study revealed that NRS2002 and MNA, in moderate agreement with each  
27 other, were consistently associated with age, BMI, Hb, ALB and PAB. Nevertheless,  
28  
29

1  
2  
3 the MNA identified more patients with or at risk of malnutrition than did the  
4  
5 NRS2002. The lower percentage of malnutrition classified by NRS2002 may be  
6  
7 explained in several ways. First, the NRS2002 mainly consider the influence of acute  
8  
9 diseases to nutritional status, while the MNA take chronic long-term condition into  
10  
11 account, such as psychological factors and the BMI. Psychological factors may play a  
12  
13 large role in the nutritional status of elderly inpatients. In addition, we categorized  
14  
15 undernutrition as NRS2002  $\geq 3$ , while patients with a score of 1-2 indicates low risk of  
16  
17 malnutrition.<sup>46</sup> This may have underestimated the percentage of malnutrition.  
18  
19 Moreover, our study subjects were internal medical patients, of which the proportion  
20  
21 of overweight and obesity was high. The NRS2002 take BMI  $< 18.5 \text{ kg/m}^2$  as one of  
22  
23 the criteria, which leads to a lower proportion of malnutrition with NRS2002 than that  
24  
25 of MNA. Our results are in agreement with findings from Raslan *et al*,<sup>5</sup> but differ  
26  
27 from the study conducted by Drescher *et al*.<sup>46</sup> The latter study was conducted in  
28  
29 elderly patients with acute disease, which may explain the difference.

30  
31  
32 Norman *et al* suggested that there is a close relationship between the degree of  
33  
34 malnutrition and LOS.<sup>47</sup> In the present study, we found a positive relationship between  
35  
36 NRS2002 scores and LOS. Our findings corroborated those of the study by Bauer *et*  
37  
38 *al*,<sup>48</sup> which showed longer hospital stay was associated with malnutrition assessed by  
39  
40 the MNA. We conclude, therefore, that in Chinese geriatric inpatients, the NRS2002  
41  
42 and MNA might reflect malnutrition or the studied biochemical parameters, as well as  
43  
44 predicting the length of hospitalization, however, the MNA was available for  
45  
46 identifying most of the patients with or at risk of malnutrition.  
47  
48  
49  
50  
51  
52  
53  
54  
55  
56  
57  
58  
59  
60



## Limitations

Our study has some limitations. First, because of the lack of a gold standard for malnutrition diagnosing, we could only compare two assessment scores with BMI and biochemical parameters.<sup>49</sup> In addition, the small sample size of women may limit the power of data analysis.

## CONCLUSION

In summary, the results of the present study show a high prevalence of malnutrition risk in Chinese geriatric hospitalized patients. Although the diagnosis of nutritional status varied depending on the method used, both NRS2002 and MNA correlated with each other and with age, BMI and laboratory parameters. Besides, both tools were found to be a good predictor of the length of hospitalization. Therefore, this study suggests NRS2002 and MNA both were suitable to screen malnutrition risk among Chinese geriatric inpatients. We recommend one of them to be used in admission.

1  
2  
3  
4  
5  
6 **Acknowledgements** Thanks to the participating volunteer patients, the local research  
7  
8 ethics committee and the individual researchers, clinicians and nurses for their  
9  
10 participation in the data collection.  
11  
12

13  
14  
15 **Contributors** JPM, XQQ and HLZ are main contributors to the design of the present  
16  
17 study. JPM and XQQ contributed to the study conception and design. HLZ and CTZ  
18  
19 took part in the discussion and modification of the design and the questionnaire. XQQ,  
20  
21 HZ, MY, LYS, QHG, GYZ, QJM, YXW and SGL were involved in the acquisition of  
22  
23 data. JPM and XQQ contributed to the drafting of the manuscript. JPM participated in  
24  
25 data gathering, analysis and interpretation. HLZ and CTZ were involved in the critical  
26  
27 revision. All authors have seen and agreed to the submission of the final manuscript.  
28  
29  
30  
31  
32  
33  
34  
35

36 **Funding** This project was funded by the National Natural Science Foundation of  
37  
38 China (Grant No. 81400255).  
39  
40  
41  
42  
43  
44

45 **Competing interests** None declared.  
46  
47  
48  
49  
50  
51

52 **Ethics approval** Ethics Review Board of Tongji Hospital, Tongji Medical College,  
53  
54 Huazhong University of Science and Technology (TJ-C20141112).  
55  
56  
57  
58  
59  
60

1  
2  
3  
4  
5  
6  
7 **Provenance and peer review** Not commissioned; externally peer reviewed.  
8  
9

10  
11  
12  
13 **Data sharing statement** No additional data are available.  
14  
15

16  
17  
18  
19 **Open Access** This is an Open Access article distributed in accordance with the  
20  
21 Creative Commons Attribution Non Commercial (CC BY-NC 4.0) license, which  
22  
23 permits others to distribute, remix, adapt, build upon this work non-commercially, and  
24  
25 license their derivative works on different terms, provided the original work is  
26  
27 properly cited and the use is non-commercial. See:  
28  
29 <http://creativecommons.org/licenses/by-nc/4.0/>  
30  
31  
32  
33  
34  
35  
36  
37  
38  
39  
40  
41

#### 42 **Figure legend**

43 **Figure 1** MNA (a) and NRS2002 (b) referring to serum albumin, prealbumin,  
44  
45 hemoglobin and blood lymphocytes count respectively.  
46  
47  
48  
49  
50  
51  
52  
53  
54  
55  
56  
57  
58  
59  
60

**REFERENCES**

1. Guigoz Y. The Mini Nutritional Assessment (MNA) review of the literature--What does it tell us? *J Nutr Health Aging*. 2006;10:466-85; discussion 485-7.
2. Chang SF. Frailty Is a Major Related Factor for at Risk of Malnutrition in Community-Dwelling Older Adults. *J Nurs Scholarsh*. 2017;49:63-72.
3. Lumale S. [Nutritional management of elderly people, everyone's concern]. *Rev Infirm*. 2017;66:25-26.
4. Lesourd B. Nutritional factors and immunological ageing. *Proc Nutr Soc*. 2006;65:319-25.
5. Raslan M, Gonzalez MC, Dias MC, *et al*. Comparison of nutritional risk screening tools for predicting clinical outcomes in hospitalized patients. *Nutrition*. 2010;26:721-6.
6. Ehwermuepha L, Bendig D, Steele C, *et al*. The Effect of Malnutrition on the Risk of Unplanned 7-Day Readmission in Pediatrics. *Hosp Pediatr*. 2018.
7. Ahmed N, Choe Y, Mustad VA, *et al*. Impact of malnutrition on survival and healthcare utilization in Medicare beneficiaries with diabetes: a retrospective cohort analysis. *BMJ Open Diabetes Res Care*. 2018;6:e000471.
8. Sharma Y, Miller M, Kaambwa B, *et al*. Malnutrition and its association with readmission and death within 7 days and 8-180 days postdischarge in older patients: a prospective observational study. *BMJ Open*. 2017;7:e018443.
9. Khalatbari-Soltani S, Marques-Vidal P. The economic cost of hospital malnutrition in Europe; a narrative review. *Clin Nutr ESPEN*. 2015;10:e89-e94.
10. Bouillanne O, Curis E, Hamon-Vilcot B, *et al*. Impact of protein pulse feeding on lean mass in malnourished and at-risk hospitalized elderly patients: a randomized controlled trial. *Clin Nutr*. 2013;32:186-92.
11. Ballesteros-Pomar MD, Martinez Llinas D, Goates S, *et al*. Cost-Effectiveness of a Specialized Oral Nutritional Supplementation for Malnourished Older Adult Patients in Spain. *Nutrients*. 2018;10.
12. Racic M, Ivkovic N, Kusmuk S. [Screening of Nutritional Status among Elderly People at Family Medicine]. *Acta Med Croatica*. 2015;69:347-56.
13. Abd Aziz NAS, Teng N, Abdul Hamid MR, *et al*. Assessing the nutritional status of hospitalized elderly. *Clin Interv Aging*. 2017;12:1615-1625.
14. Elia M, Stratton R. On the ESPEN guidelines for nutritional screening 2002. *Clin Nutr*. 2004;23:131-2.
15. Kondrup J, Rasmussen HH, Hamberg O, *et al*. Nutritional risk screening (NRS 2002): a new method based on an analysis of controlled clinical trials. *Clin Nutr*. 2003;22:321-36.
16. Kondrup J, Allison SP, Elia M, *et al*. ESPEN guidelines for nutrition screening 2002. *Clin Nutr*. 2003;22:415-21.
17. Bleda MJ, Bolibar I, Pares R, *et al*. Reliability of the mini nutritional assessment (MNA) in institutionalized elderly people. *J Nutr Health Aging*. 2002;6:134-7.
18. Bollwein J, Volkert D, Diekmann R, *et al*. Nutritional status according to the mini nutritional assessment (MNA(R)) and frailty in community dwelling older persons: a close relationship. *J Nutr Health Aging*. 2013;17:351-6.
19. Dent E, Visvanathan R, Piantadosi C, *et al*. Use of the Mini Nutritional Assessment to detect frailty in hospitalised older people. *J Nutr Health Aging*. 2012;16:764-7.
20. Cabre M, Ferreira C, Arus M, *et al*. Evaluation of CONUT for Clinical Malnutrition Detection and

- 1  
2  
3 Short-Term Prognostic Assessment in Hospitalized Elderly People. *J Nutr Health Aging*.  
4 2015;19:729-33.
- 5 21. Chavarro-Carvajal D, Reyes-Ortiz C, Samper-Ternent R, *et al*. Nutritional assessment and factors  
6 associated to malnutrition in older adults: a cross-sectional study in Bogota, Colombia. *J Aging*  
7 *Health*. 2015;27:304-19.
- 8 22. Kyle UG, Kossovsky MP, Karsegard VL, *et al*. Comparison of tools for nutritional assessment and  
9 screening at hospital admission: a population study. *Clin Nutr*. 2006;25:409-17.
- 10 23. Sergi G, Coin A, Enzi G, *et al*. Role of visceral proteins in detecting malnutrition in the elderly.  
11 *Eur J Clin Nutr*. 2006;60:203-9.
- 12 24. Omran ML, Morley JE. Assessment of protein energy malnutrition in older persons, Part II:  
13 Laboratory evaluation. *Nutrition*. 2000;16:131-40.
- 14 25. Omran ML, Morley JE. Assessment of protein energy malnutrition in older persons, part I: History,  
15 examination, body composition, and screening tools. *Nutrition*. 2000;16:50-63.
- 16 26. Zhou J, Wang M, Wang H, *et al*. Comparison of two nutrition assessment tools in surgical elderly  
17 inpatients in Northern China. *Nutr J*. 2015;14:68.
- 18 27. Blackburn GL, Bistrain BR, Maini BS, *et al*. Nutritional and metabolic assessment of the  
19 hospitalized patient. *JPEN J Parenter Enteral Nutr*. 1977;1:11-22.
- 20 28. Thoresen L, Frykholm G, Lydersen S, *et al*. Nutritional status, cachexia and survival in patients  
21 with advanced colorectal carcinoma. Different assessment criteria for nutritional status provide  
22 unequal results. *Clin Nutr*. 2013;32:65-72.
- 23 29. Jacobsen EL, Brovold T, Bergland A, *et al*. Prevalence of factors associated with malnutrition  
24 among acute geriatric patients in Norway: a cross-sectional study. *BMJ Open*. 2016;6:e011512.
- 25 30. Cabrerizo S, Cuadras D, Gomez-Busto F, *et al*. Serum albumin and health in older people: Review  
26 and meta analysis. *Maturitas*. 2015;81:17-27.
- 27 31. O'Daly BJ, Walsh JC, Quinlan JF, *et al*. Serum albumin and total lymphocyte count as predictors  
28 of outcome in hip fractures. *Clin Nutr*. 2010;29:89-93.
- 29 32. Chiu PF, Tsai CC, Wu CL, *et al*. Trajectories of Serum Albumin Predict Survival of Peritoneal  
30 Dialysis Patients: A 15-year Follow-Up Study. *Medicine (Baltimore)*. 2016;95:e3202.
- 31 33. Covinsky KE, Covinsky MH, Palmer RM, *et al*. Serum albumin concentration and clinical  
32 assessments of nutritional status in hospitalized older people: different sides of different coins?  
33 *Journal of the American Geriatrics Society*. 2002;50:631-7.
- 34 34. Carriere I, Dupuy AM, Lacroux A, *et al*. Biomarkers of inflammation and malnutrition associated  
35 with early death in healthy elderly people. *Journal of the American Geriatrics Society*.  
36 2008;56:840-6.
- 37 35. Devoto G, Gallo F, Marchello C, *et al*. Prealbumin serum concentrations as a useful tool in the  
38 assessment of malnutrition in hospitalized patients. *Clinical chemistry*. 2006;52:2281-5.
- 39 36. Langkamp-Henken B, Hudgens J, Stechmiller JK, *et al*. Mini nutritional assessment and screening  
40 scores are associated with nutritional indicators in elderly people with pressure ulcers. *J Am Diet*  
41 *Assoc*. 2005;105:1590-6.
- 42 37. Kanda M, Mizuno A, Tanaka C, *et al*. Nutritional predictors for postoperative short-term and  
43 long-term outcomes of patients with gastric cancer. *Medicine (Baltimore)*. 2016;95:e3781.
- 44 38. Vellas B, Guigoz Y, Baumgartner M, *et al*. Relationships between nutritional markers and the  
45 mini-nutritional assessment in 155 older persons. *Journal of the American Geriatrics Society*.  
46 2000;48:1300-9.
- 47  
48  
49  
50  
51  
52  
53  
54  
55  
56  
57  
58  
59  
60

- 1
- 2
- 3 39. Lopez-Hellin J, Baena-Fustegueras JA, Schwartz-Riera S, *et al.* Usefulness of short-lived proteins
- 4 as nutritional indicators surgical patients. *Clin Nutr.* 2002;21:119-25.
- 5
- 6 40. Wham CA, Teh RO, Robinson M, *et al.* What is associated with nutrition risk in very old age? *J*
- 7 *Nutr Health Aging.* 2011;15:247-51.
- 8
- 9 41. Weng CH, Hsu CW, Hu CC, *et al.* Association Between Hemodiafiltration and Hypoalbuminemia
- 10 in Middle-Age Hemodialysis Patients. *Medicine (Baltimore).* 2016;95:e3334.
- 11
- 12 42. Lei Z, Qingyi D, Feng G, *et al.* Clinical study of mini-nutritional assessment for older Chinese
- 13 inpatients. *J Nutr Health Aging.* 2009;13:871-5.
- 14
- 15 43. Antaki F, French MM, Moonka DK, *et al.* Bioelectrical impedance analysis for the evaluation of
- 16 hepatic fibrosis in patients with chronic hepatitis C infection. *Dig Dis Sci.* 2008;53:1957-60.
- 17
- 18 44. Roongpisuthipong C, Sobhonslidsuk A, Nantiruj K, *et al.* Nutritional assessment in various stages
- 19 of liver cirrhosis. *Nutrition.* 2001;17:761-5.
- 20
- 21 45. Akinyemiju T, Meng Q, Vin-Raviv N. Association between body mass index and in-hospital
- 22 outcomes: Analysis of the nationwide inpatient database. *Medicine (Baltimore).* 2016;95:e4189.
- 23
- 24 46. Drescher T, Singler K, Ulrich A, *et al.* Comparison of two malnutrition risk screening methods
- 25 (MNA and NRS 2002) and their association with markers of protein malnutrition in geriatric
- 26 hospitalized patients. *Eur J Clin Nutr.* 2010;64:887-93.
- 27
- 28 47. Norman K, Pichard C, Lochs H, *et al.* Prognostic impact of disease-related malnutrition. *Clin Nutr.*
- 29 2008;27:5-15.
- 30
- 31 48. Bauer JM, Vogl T, Wicklein S, *et al.* Comparison of the Mini Nutritional Assessment, Subjective
- 32 Global Assessment, and Nutritional Risk Screening (NRS 2002) for nutritional screening and
- 33 assessment in geriatric hospital patients. *Z Gerontol Geriatr.* 2005;38:322-7.
- 34
- 35 49. Soeters PB, Reijven PL, van Bokhorst-de van der Schueren MA, *et al.* A rational approach to
- 36 nutritional assessment. *Clin Nutr.* 2008;27:706-16.
- 37
- 38
- 39
- 40
- 41
- 42
- 43
- 44
- 45
- 46
- 47
- 48
- 49
- 50
- 51
- 52
- 53
- 54
- 55
- 56
- 57
- 58
- 59
- 60

**Table 1** Characteristic of study participants

| Variable                                        | All subjects (n=425)     |
|-------------------------------------------------|--------------------------|
| Age (year)                                      | 81.16±5.89 (70-98)       |
| Gender                                          |                          |
| Male                                            | 68.9% (293)              |
| Female                                          | 31.1% (132)              |
| Height (m)                                      | 1.64±0.08 (1.42-1.82)    |
| Weight (kg)                                     | 62.89±11.51 (28.4-92.0)  |
| Body mass index (kg/m <sup>2</sup> )            | 23.22±3.73 (11.09-34.14) |
| Length of hospital stay (day)                   | 21.86±13.75 (4-133)      |
| Primary cause of admission to hospital          |                          |
| Cardiac disease                                 | 160 (37.65%)             |
| Pulmonary infection                             | 84 (19.77%)              |
| Hypertension                                    | 76 (17.88%)              |
| Cerebrovascular disease                         | 45 (10.59%)              |
| Digestive disease                               | 25 (5.88%)               |
| Malignancy                                      | 19 (4.47%)               |
| Others                                          | 16 (3.76%)               |
| Comorbidities                                   |                          |
| Hypertension                                    | 210 (49.41%)             |
| Diabetes mellitus                               | 101 (23.76%)             |
| Cardiac disease (including atrial fibrillation) | 94 (22.12%)              |
| Cerebrovascular disease                         | 30 (7.06%)               |
| NRS2002 score                                   | 2.44±1.34 (0-7)          |
| 0-2 points (normal nutritional status)          | 59.06% (251)             |
| 3-7 points (under-nourished)                    | 40.94% (174)             |
| MNA score                                       | 20.79±5.94 (3.5-29.0)    |
| <17 points (malnutrition)                       | 23.29% (99)              |
| 17-23.5 points (at risk for malnutrition)       | 35.29% (150)             |
| ≥24 points (well-nourished)                     | 41.41% (176)             |
| Laboratory analysis                             |                          |
| Hemoglobin (g/L)                                | 120.71±20.47 (55-181)    |
| Lymphocyte count (10 <sup>9</sup> /L)           | 1.44±0.81 (0.20-6.58)    |
| Albumin (g/L)                                   | 37.63±5.37 (21.6-70.0)   |
| Prealbumin (mg/L)                               | 193.94±68.39 (8-380)     |

MNA = Mini-Nutritional Assessment, NRS2002 = Nutritional Risk Screening 2002.  
 Values are mean ± standard deviation (with ranges in brackets) or % (numbers), respectively.

**Table 2** Nutritional status (% , n) of 425 patients classified by NRS2002, MNA, BMI and serum parameters

|             | <b>Under-nourished</b> | <b>Well-nourished</b> |
|-------------|------------------------|-----------------------|
| NRS2002     | 40.94% (174)           | 59.06% (251)          |
| MNA         | 58.59% (249)           | 41.41% (176)          |
| BMI         | 23.66% (93)            | 76.34% (300)          |
| ALB         | 28.71% (122)           | 71.29% (303)          |
| PAB         | 47.30% (70)            | 52.70% (78)           |
| Hb          | 36.75%(154)            | 63.25%(265)           |
| Hb (male)   | 41.72%(121)            | 58.28%(169)           |
| Hb (female) | 25.58% (33)            | 74.42% (96)           |
| TLC         | 35.90% (149)           | 64.10%(266)           |

ALB = albumin, BMI = Body mass index, Hb = hemoglobin, MNA = Mini-Nutritional Assessment, NRS2002 = Nutritional Risk Screening 2002, PAB = prealbumin, TLC = total lymphocyte count. Under-nourished (malnourished + at risk of malnutrition).



**Table 3** Cross-classification

| MNA             | NRS2002         |                | Total |
|-----------------|-----------------|----------------|-------|
|                 | Under-nourished | Well-nourished |       |
| Under-nourished | 159             | 90             | 249   |
| Well-nourished  | 15              | 161            | 176   |
| Total           | 174             | 251            | 425   |
| Kappa           | 0.521           |                |       |
| <i>P</i>        | <0.001          |                |       |

Number of patients classified into two categories according to MNA and NRS, respectively. MNA = Mini-Nutritional assessment, NRS2002 = Nutritional risk score 2002. Under-nourished: malnutrition + at risk of malnutrition.

**Table 4** Pearson correlation coefficients of MNA and NRS2002 scores with BMI, serum parameters and LOS

|         | MNA       |          | NRS2002   |          |
|---------|-----------|----------|-----------|----------|
|         | <i>rs</i> | <i>p</i> | <i>rs</i> | <i>p</i> |
| Age     | -0.239    | <0.001   | 0.238     | <0.001   |
| BMI     | 0.578     | <0.001   | -0.347    | <0.001   |
| Hb      | 0.387     | <0.001   | -0.321    | <0.001   |
| TLC     | -0.002    | 0.966    | 0.011     | 0.819    |
| ALB     | 0.501     | <0.001   | -0.383    | <0.001   |
| PAB     | 0.481     | <0.001   | -0.332    | <0.001   |
| LOS     | -0.109    | 0.048    | 0.178     | 0.001    |
| NRS2002 | -0.640    | <0.001   | —         | —        |

ALB = albumin, BMI = body mass index, Hb = hemoglobin, LOS = length of hospital stay, MNA = Mini-Nutritional Assessment, NRS2002 = Nutritional Risk Screening 2002, PAB = prealbumin, TLC = total lymphocyte count.

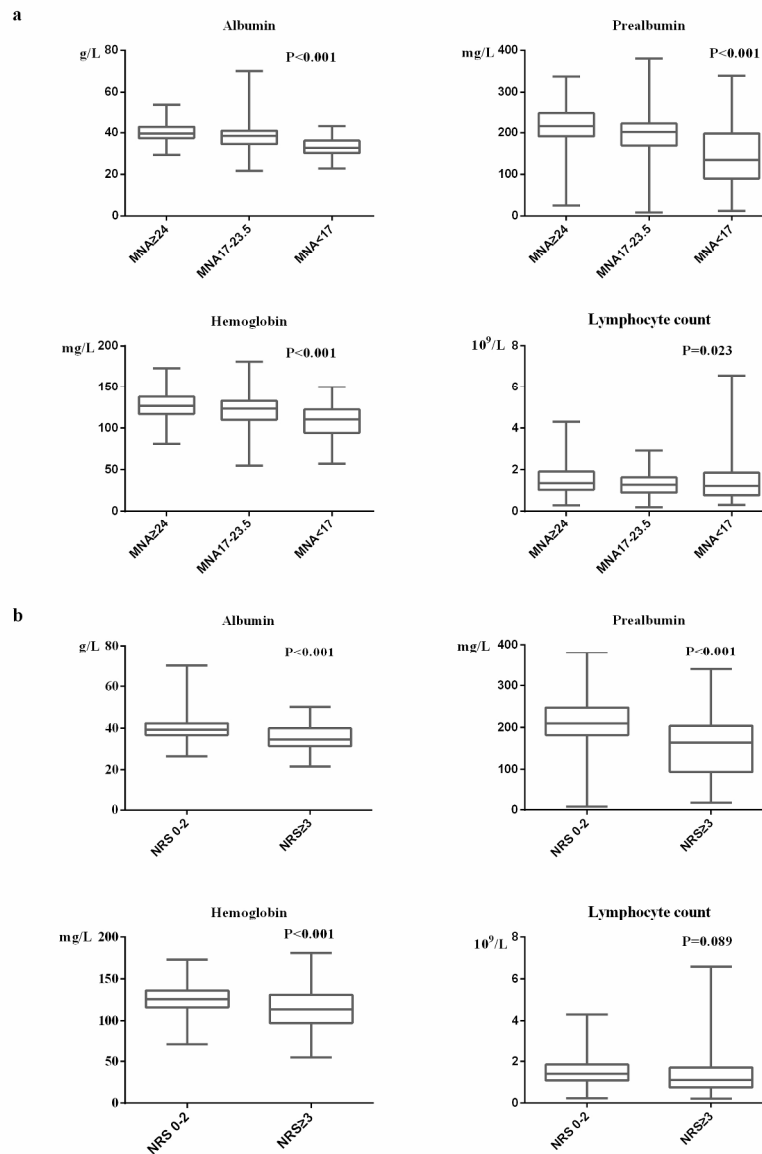

Figure 1 MNA (a) and NRS2002 (b) referring to serum albumin, prealbumin, hemoglobin and blood lymphocytes count respectively.

175x262mm (300 x 300 DPI)

# BMJ Open

## Comparison of two malnutrition risk screening tools with nutritional biochemical parameters, BMI and length of stay in Chinese geriatric inpatients: a multicenter, cross-sectional study

|                                 |                                                                                                                                                                                                                                                                                                                                                                                                                                                                                                                                                                                                                                                                                                                                                                                                                                                                                                                                                                                                                                                                                                                                                                                                                                                                                                                                                                                                                                                                                                                                                                                                                                                                                       |
|---------------------------------|---------------------------------------------------------------------------------------------------------------------------------------------------------------------------------------------------------------------------------------------------------------------------------------------------------------------------------------------------------------------------------------------------------------------------------------------------------------------------------------------------------------------------------------------------------------------------------------------------------------------------------------------------------------------------------------------------------------------------------------------------------------------------------------------------------------------------------------------------------------------------------------------------------------------------------------------------------------------------------------------------------------------------------------------------------------------------------------------------------------------------------------------------------------------------------------------------------------------------------------------------------------------------------------------------------------------------------------------------------------------------------------------------------------------------------------------------------------------------------------------------------------------------------------------------------------------------------------------------------------------------------------------------------------------------------------|
| Journal:                        | <i>BMJ Open</i>                                                                                                                                                                                                                                                                                                                                                                                                                                                                                                                                                                                                                                                                                                                                                                                                                                                                                                                                                                                                                                                                                                                                                                                                                                                                                                                                                                                                                                                                                                                                                                                                                                                                       |
| Manuscript ID                   | bmjopen-2018-022993.R1                                                                                                                                                                                                                                                                                                                                                                                                                                                                                                                                                                                                                                                                                                                                                                                                                                                                                                                                                                                                                                                                                                                                                                                                                                                                                                                                                                                                                                                                                                                                                                                                                                                                |
| Article Type:                   | Research                                                                                                                                                                                                                                                                                                                                                                                                                                                                                                                                                                                                                                                                                                                                                                                                                                                                                                                                                                                                                                                                                                                                                                                                                                                                                                                                                                                                                                                                                                                                                                                                                                                                              |
| Date Submitted by the Author:   | 12-Jun-2018                                                                                                                                                                                                                                                                                                                                                                                                                                                                                                                                                                                                                                                                                                                                                                                                                                                                                                                                                                                                                                                                                                                                                                                                                                                                                                                                                                                                                                                                                                                                                                                                                                                                           |
| Complete List of Authors:       | <p>Miao, Jian-Ping; Tongji Hospital of Tongji Medical College of Huazhong University of Science and Technology, Department of Geriatrics; Clinical Research Center for Geriatric Prevention and Treatment and Health Medicine in Hubei Province</p> <p>Quan, Xiao-Qing; Tongji Hospital of Tongji Medical College of Huazhong University of Science and Technology, Department of Geriatrics; Clinical Research Center for Geriatric Prevention and Treatment and Health Medicine in Hubei Province</p> <p>Zhang, Cun-Tai; Tongji Hospital of Tongji Medical College of Huazhong University of Science and Technology, Department of Geriatrics; Clinical Research Center for Geriatric Prevention and Treatment and Health Medicine in Hubei Province</p> <p>Zhu, Hong; the Central Hospital of Wuhan University, Department of Geriatrics</p> <p>Ye, Mei; Zhongnan Hospital of Wuhan University, Department of Geriatrics</p> <p>Shen, Li-Ya; Wuhan No. 6 Hospital, Department of Geriatrics</p> <p>Guo, Qiu-Hui; Wuhan No. 6 Hospital, Department of Geriatrics</p> <p>Zhu, Gang-Yan; Hubei General Hospital, Department of Geriatrics</p> <p>Mei, Qi-Jian; General Hospital of the Yangtze River Shipping</p> <p>Wu, Yan-Xia; Wuhan No 1 Hospital, Department of Geriatrics</p> <p>Li, Shu-Guo; First Clinical Medical College, Three Gorges University &amp; Yichang Central People's Hospital, Department of Geriatrics</p> <p>Zhou, Hong-Lian; Tongji Hospital of Tongji Medical College of Huazhong University of Science and Technology, Department of Geriatrics; Clinical Research Center for Geriatric Prevention and Treatment and Health Medicine in Hubei Province</p> |
| <b>Primary Subject Heading</b>: | Nutrition and metabolism                                                                                                                                                                                                                                                                                                                                                                                                                                                                                                                                                                                                                                                                                                                                                                                                                                                                                                                                                                                                                                                                                                                                                                                                                                                                                                                                                                                                                                                                                                                                                                                                                                                              |
| Secondary Subject Heading:      | Nutrition and metabolism                                                                                                                                                                                                                                                                                                                                                                                                                                                                                                                                                                                                                                                                                                                                                                                                                                                                                                                                                                                                                                                                                                                                                                                                                                                                                                                                                                                                                                                                                                                                                                                                                                                              |
| Keywords:                       | malnutrition risk, NRS2002, MNA, older patients                                                                                                                                                                                                                                                                                                                                                                                                                                                                                                                                                                                                                                                                                                                                                                                                                                                                                                                                                                                                                                                                                                                                                                                                                                                                                                                                                                                                                                                                                                                                                                                                                                       |
|                                 |                                                                                                                                                                                                                                                                                                                                                                                                                                                                                                                                                                                                                                                                                                                                                                                                                                                                                                                                                                                                                                                                                                                                                                                                                                                                                                                                                                                                                                                                                                                                                                                                                                                                                       |

1  
2  
3  
4  
5  
6  
7  
8  
9  
10  
11  
12  
13  
14  
15  
16  
17  
18  
19  
20  
21  
22  
23  
24  
25  
26  
27  
28  
29  
30  
31  
32  
33  
34  
35  
36  
37  
38  
39  
40  
41  
42  
43  
44  
45  
46  
47  
48  
49  
50  
51  
52  
53  
54  
55  
56  
57  
58  
59  
60

SCHOLARONE™  
Manuscripts

For peer review only

1  
2  
3 **Comparison of two malnutrition risk screening tools with nutritional**  
4 **biochemical parameters, BMI and length of stay in Chinese geriatric inpatients:**  
5 **a multicenter, cross-sectional study**  
6  
7  
8  
9

10 Jian-Ping Miao<sup>1,2,3</sup>, Xiao-Qing Quan<sup>1,2,3</sup>, Cun-Tai Zhang<sup>1,2,3</sup>, Hong Zhu<sup>4</sup>, Mei Ye<sup>5</sup>,  
11 Li-Ya Shen<sup>6</sup>, Qiu-Hui Guo<sup>6</sup>, Gang-Yan Zhu<sup>7</sup>, Qi-Jian Mei<sup>8</sup>, Yan-Xia Wu<sup>9</sup>,  
12 Shu-Guo Li<sup>10</sup>, Hong-Lian Zhou<sup>1,2,3\*</sup>  
13  
14  
15  
16  
17  
18  
19

20 **Running title: Malnutrition screening in Chinese geriatric patients**  
21  
22

- 23 1. Department of Geriatrics, Tongji Hospital, Tongji Medical College, Huazhong  
24 University of Science and Technology;  
25  
26 2. Clinical Research Center for Geriatric Prevention and Treatment and Health  
27 Medicine in Hubei Province  
28  
29 3. Clinical Research Center for Treatment and Rehabilitation of Elderly Multi-Organ  
30 Dysfunction in Wuhan  
31  
32 4. Department of Geriatrics, the Central Hospital of Wuhan University;  
33  
34 5. Department of Geriatrics, Zhongnan Hospital of Wuhan University;  
35  
36 6. Department of Geriatrics, Wuhan No. 6 Hospital;  
37  
38 7. Department of Geriatrics, Hubei General Hospital;  
39  
40 8. Department of Geriatrics, General Hospital of the Yangtze River Shipping;  
41  
42 9. Department of Geriatrics, Wuhan No 1 Hospital;  
43  
44 10. Department of Geriatrics, First Clinical Medical College, Three Gorges University  
45 & Yichang Central People's Hospital.  
46  
47  
48  
49

50 JPM and XQQ contributed equally.  
51  
52  
53

54 Correspondence to Dr Hong-Lian Zhou; zhouhonglian63@163.com  
55  
56  
57  
58  
59  
60

## ABSTRACT

**Objectives:** The aim of this study was to assess malnutrition risk in Chinese geriatric inpatients with Nutritional Risk Screening (NRS2002) and Mini-Nutritional Assessment (MNA), and to identify the most appropriate nutritional screening tool for these patients.

**Design:** Cross-sectional study.

**Setting:** Eight medical centers in Hubei province, China.

**Participants:** A total of 425 inpatients aged  $\geq 70$  years were consecutively recruited between December 2014 and May 2016.

**Primary and secondary outcome measures:** Nutritional risk was assessed by NRS2002, MNA, anthropometric measurements and biochemical parameters within 24 hours of admission. Comorbidities and length of hospitalization were recorded. Nutritional parameters, BMI and length of hospital stay were used to compare MNA and NRS2002. Besides, Kappa analysis was used to evaluate the consistency of the two tools.

**Results:** The average age was  $81.2 \pm 5.9$  years (range, 70-98). The prevalence of undernutrition classified by NRS2002 and MNA was 40.9% and 58.6%, respectively. Patients with malnutrition had lower BMI, hemoglobin, albumin and prealbumin ( $P < 0.05$ ), and longer length of hospital stay (LOS) ( $P < 0.05$ ). The NRS2002 showed moderate agreement ( $\kappa = 0.521$ ,  $P < 0.001$ ) with MNA. Both tools showed significant correlation with age, BMI and laboratory parameters ( $P < 0.001$ ). In addition, a significant association between both tools and LOS was found ( $P < 0.05$ ).

1  
2  
3 **Conclusions:** The results show a relatively high prevalence of malnutrition risk in our  
4 sample cohort. We found NRS2002 and MNA both were suitable to screen  
5  
6 malnutrition risk among Chinese geriatric inpatients.  
7  
8  
9

### 10 11 12 13 14 15 16 17 18 **Strengths and limitations of this study**

- 19  
20 ▶ This study assessed the risk of malnutrition among Chinese elderly inpatients with  
21 two different tools (NRS2002 and MNA).  
22
- 23  
24 ▶ The study provides useful information to assess the risk of malnutrition among  
25 Chinese elderly inpatients.  
26
- 27  
28 ▶ The consensus statement with diagnostic criteria for malnutrition was proposed in  
29 2015 after our study initiated, thus it was not utilized in our study.  
30  
31
- 32  
33 ▶ The small sample size of women may limit the generalizability of the results.  
34
- 35  
36 ▶ Regarding the cross-classification of MNA, more patients will be categorized as at  
37 risk since the two groups malnourished and at risk are combined.  
38  
39  
40  
41  
42  
43  
44  
45  
46

47 **Keywords:** malnutrition risk; NRS2002; MNA; older patients  
48  
49  
50  
51  
52  
53  
54  
55  
56  
57  
58  
59  
60



## INTRODUCTION

Malnutrition is a common condition affecting almost 13-78% of the elderly population.<sup>1</sup> It is highly associated with many adverse outcomes including frailty,<sup>2</sup> muscle wasting<sup>3</sup>, weakened immune system<sup>4</sup>, longer hospitalization,<sup>5</sup> increased morbidity<sup>6</sup> and mortality.<sup>7,8</sup> These outcomes contribute to large increases in medical expenditures.<sup>9</sup> Early identification and treatment of malnutrition can lead to better quality of life<sup>10</sup> and improved outcomes<sup>11</sup> in older inpatients. Therefore, the application of appropriate tools to assess the risk of malnutrition in geriatric patients is essential.

Nutritional risk screening and nutritional assessment tools are readily available nowadays.<sup>12</sup> These tools are used to identify patients with nutritional risk or nutritional deficiencies and to determine if intervention is needed. There are a variety of nutritional risk screening methods,<sup>13</sup> mainly involving anthropometric and biochemical parameters. However, to date, no single tool can be considered as the universal gold standard for the assessment of nutritional risk among the older inpatients.

The Nutritional Risk Screening (NRS2002) is recommended for hospitalized patients by the European Society of Parenteral and Enteral Nutrition (ESPEN).<sup>14</sup> It can quickly determine whether a patient needs nutritional support, especially for patients with acute complications.<sup>15,16</sup> However, NRS2002 use excludes patients who cannot be weighed or have problems of communication and the tool isn't specifically

1  
2  
3 developed for older patients.  
4  
5

6 The Mini-Nutritional Assessment (MNA) is established for the nutritional  
7 screening and assessment in the geriatrics settings.<sup>1, 17</sup> The ESPEN recommends the  
8 use of this tool for elderly populations.<sup>18</sup> The MNA was validated against a clinical  
9 evaluations of two geriatrics, including biochemical parameters (nutritional  
10 parameters, C-reactive protein, cholesterol, vitamins), anthropometry (BMI, brachial  
11 circumference, calf circumference, skinfold width of the triceps and subscapular  
12 muscles), dietary components and functional assessment outcomes.<sup>19</sup> It has been  
13 shown to predict outcomes, functional status, mortality, number of hospital visits and  
14 the related healthcare costs.<sup>18, 20-23</sup> In contrast to the NRS2002, the MNA is more time  
15 consuming.<sup>24</sup> Hence, two short forms of the MNA has been developed and validated,  
16 the most recently the revised MNA-SF by Kaiser *et al*<sup>25</sup>, which is nowadays the  
17 recommended version of the MNA for clinical use. This instrument only incorporates  
18 6 of the original 18 items and takes approximately 5 minutes to perform.  
19  
20  
21  
22  
23  
24  
25  
26  
27  
28  
29  
30  
31  
32  
33  
34  
35  
36  
37  
38

39 A number of studies suggested serum proteins are associated with malnutrition,  
40 but the nature of this association is controversial.<sup>26-28</sup> Hemoglobin and total  
41 lymphocyte count were also proposed as useful indicators of nutritional status.<sup>27, 29</sup>  
42  
43 The aim of our study was to assess the risk of malnutrition among Chinese older  
44 participants with two different tools (NRS2002 and MNA), to compare them in terms  
45 of nutritional biochemical parameters and length of hospital stay (LOS), and to  
46 determine the most appropriate tool for these patients. We hypothesized that both  
47 tools were suitable for the study population.  
48  
49  
50  
51  
52  
53  
54  
55  
56  
57  
58  
59  
60

## METHODS

### Study subjects

This study consecutively recruited patients older than 70 years of age who attended internal medicine of geriatrics department of eight large size Tertiary comprehensive hospitals in Hubei Province from December 2014 to May 2016. The eight hospitals are as follows: (1) Tongji Hospital, Tongji Medical College, Huazhong University of Science and Technology, (2) The Central Hospital of Wuhan University, (3) Zhongnan Hospital of Wuhan University, (4) Wuhan No. 6 Hospital, Affiliated Hospital of Jiangnan University, (5) Hubei General Hospital, (6) General Hospital of The Yangtze River Shipping, (7) Wuhan No. 1 Hospital, (8) The First College of Clinical Medical Science, Three Gorges University and Yichang Central People's Hospital.

This cross-sectional study received approval from the institutional Ethics Committee and all subjects signed written informed consent before participation. Inclusion criteria were: (1) age 70 years or older, (2) the patients themselves or their proxies were able to clearly answer study questions, (3) hospital stay was longer than 24 hours and (4) patients were willing to cooperate with the study. Exclusion criteria included: (1) younger than 70 years old, (2) refusal to participate in the study and (3) patients was unconscious or unable to answer the study questions (Figure 1).

### **Nutritional risk screening 2002 (NRS2002)**

The NRS2002 consists of the following parameters: the severity of acute illness, BMI, patient appetite, accidental weight loss and patient age.<sup>15</sup> The total score ranges from 0 to 7.<sup>16</sup> For investigational purposes, patients were categorized into two groups: a total score  $\geq 3$  indicates under-nourished (at nutritional risk/malnourished), 0-2 indicates normal nutrition status.<sup>14,30</sup> A nutritional care plan was initiated for patients with a score  $\geq 3$ .<sup>31</sup>

### **Mini-Nutritional Assessment (MNA)**

The MNA consists of four parts: anthropometric assessment (0-8 points), general assessment (0-9 points), dietetic habits evaluation (0-9 points) and self-assessment of the nutrition and health status (0-4 points).<sup>32</sup> A score below 17 indicates malnutrition, 17-23.5 indicates malnutrition risk and 24-30 indicates well-nourished.<sup>33</sup> A nutritional care plan was initiated for patients with a score  $< 17$ .<sup>31</sup>

### **Data Collecting**

Each hospital had 2 researchers trained before the study started. The main contents were about how to interpret the questions in the instruments (MNA and NRS2002) and how to perform the measurements. The patients were evaluated with both MNA and NRS2002 by two trained researchers on the first day of admission or

1  
2  
3  
4  
5  
6  
7  
8  
9  
10  
11  
12  
13  
14  
15  
16  
17  
18  
19  
20  
21  
22  
23  
24  
25  
26  
27  
28  
29  
30  
31  
32  
33  
34  
35  
36  
37  
38  
39  
40  
41  
42  
43  
44  
45  
46  
47  
48  
49  
50  
51  
52  
53  
54  
55  
56  
57  
58  
59  
60

early morning of the next day.

Comorbidities and length of hospitalization were obtained from medical records. Patients were diagnosed by their bedside clinician and superior clinicians. Two trained researchers of each hospital verified the diagnoses and acquired data. Body height and weight were measured at 6-8 am within 24 hours after admission. Patients were asked to be fasting, only wearing ward clothes and taking off shoes before measurement. Height was measured with a calibrated scale (corrected to  $\pm 0.5$  cm). The actual body mass was measured with a calibrated scale (corrected to  $\pm 0.2$  kg). The body mass index (BMI) was then calculated as weight/height squared ( $\text{kg}/\text{m}^2$ ).

Blood samples were also obtained within 24 hours after admission. Nutritional biochemical parameters: serum hemoglobin (Hb), total lymphocyte count (TLC), albumin (ALB) and prealbumin (PAB) were examined in the hospital's clinical chemistry laboratory. Malnutrition was determined when the value of Hb was  $<120$  g/L for males and  $<110$  g/L for females. The cutoff value of ALB was 35 g/L (normal range 35-55 g/L), PAB was 200mg/L (normal range 200-400 mg/L), TLC was  $1.1 \times 10^9/\text{L}$  (normal range  $1.1-3.2 \times 10^9/\text{L}$ ) for both genders for malnutrition.<sup>34</sup> Moreover, based on previous research, the cutoff value of BMI was set at  $20.5 \text{ kg}/\text{m}^2$  for malnutrition according to the epidemiological study in China.<sup>35</sup>

### **Patient and public involvement**

Through the cross-sectional study, the older adults were recruited in eight hospitals.

1  
2  
3 After obtaining informed consent, the two trained researchers in each hospital were  
4  
5 responsible for investigating the subjects, and the results of measurements would be  
6  
7 disseminated to participants immediately after the investigation.  
8  
9

### 10 11 12 13 **Statistical analysis** 14

15  
16 The statistical analyses were conducted using SPSS 19.0. Data were presented as  
17  
18 mean  $\pm$  standard deviation and ranges in blanket. The chi-square test or student's *t*-test  
19  
20 was used according to the data type. One-way analysis of variance was applied for  
21  
22 multigroup comparisons. Correlation analysis was qualified by the Pearson correlation  
23  
24 test. The simple linear regression analysis was used to estimate the relationship  
25  
26 between both instruments (MNA/NRS2002) and LOS. Agreement between the two  
27  
28 screening tools was achieved by the kappa ( $\kappa$ ) statistic. The results were interpreted as  
29  
30 follows:  $<0$ , no agreement; 0-0.19, poor concordance; 0.20-0.39, fair agreement;  
31  
32 0.40-0.59, moderate agreement; 0.60-0.79, substantial agreement; and 0.80-1.00,  
33  
34 almost perfect agreement.<sup>29</sup> The level of significance was set at  $P < 0.05$ .  
35  
36  
37  
38  
39  
40  
41  
42  
43  
44  
45  
46  
47  
48  
49  
50  
51  
52  
53  
54  
55  
56  
57  
58  
59  
60

## RESULTS

Over the study period, a total of 425 individuals from the Department of Geriatrics of eight hospitals in Hubei Province met the eligibility criteria and completed a nutrition assessment within 24 hours of admission (Figure 1). The average age was  $81.2 \pm 5.9$  years (range, 70-98) and 31.1% were females. The average body mass index was  $23.2 \pm 3.7$  kg/m<sup>2</sup> (range, 11.1-34.1). The average length of hospitalization was  $21.9 \pm 13.7$  days (range, 4-133). The most frequent cause of hospitalization were cardiac disease, followed by pulmonary infection, hypertension, cerebrovascular diseases, digestive disease and malignancies, while the most frequent comorbidities were hypertension, diabetes mellitus, cardiac disease and cerebrovascular disease. Characteristics of study participants are shown in table 1.

According to the NRS2002, about 174 patients (40.9%) were under-nourished, 251 patients (59.1%) were at normal nutritional status. The MNA showed that 99 patients (23.3%) were malnourished, 150 patients (35.3%) were at risk of malnutrition and 176 patients (41.4%) had a normal nutritional status.

Table 2 shows the risk of undernutrition, varying from 23.7% to 58.6%, according to the different methods employed in our study. The risk of under-nourished participants classified by NRS2002, MNA, BMI, ALB, PAB, TLC were 40.9%, 58.6%, 23.7%, 28.7%, 47.3%, 35.9%, respectively. The risk of malnutrition was

1  
2  
3 higher in men than that of women according to hemoglobin (41.7% vs 25.6%,  
4  
5  
6 respectively).

7  
8 Although both instruments were closely related to each other ( $P<0.001$ ), they  
9  
10 showed substantial differences. Table 3 shows the cross-classification of MNA and  
11  
12 NRS2002 regarding two nutritional categories. The MNA classified more patients as  
13  
14 under-nourished than the NRS2002 (249 vs 174, respectively). Of the 249 patients  
15  
16 classified as under-nourished by the MNA, the NRS2002 coincidentally categorized  
17  
18 159 as malnourished, and 90 as well-nourished. The NRS2002, on the other hand,  
19  
20 classified 174 patients as under-nourished. Within this group of participants, the MNA  
21  
22 classified 159 patients as under-nourished and 15 as well-nourished. What's more, a  
23  
24 participant considered by the MNA to be well-nourished can be classified as  
25  
26 under-nourished using the NRS2002. The individual categorization of nutritional  
27  
28 status showed moderate agreement between MNA and NRS2002 ( $\kappa=0.521$ ,  $P<0.001$ ).

29  
30 Data of Hb, TLC, ALB and PAB concentrations are listed in table 2 and  
31  
32 additional table 1. There were significant decrease of ALB, PAB, Hb and TLC in the  
33  
34 three groups of MNA scores ( $P<0.001$  and  $P=0.023$ , figure 2a). Specifically, the  
35  
36 group with the lowest MNA score  $<17$  ( $n=99$ ), indicating a poor nutritional state, had  
37  
38 an average serum albumin of  $33.3\pm 4.8$  g/L (range, 22.8-43.2), an average prealbumin  
39  
40 of  $140.8\pm 81.7$  mg/L (range, 12-339) and an average hemoglobin of  $109.0\pm 20.8$  mg/L  
41  
42 (range, 57-150.2), an average lymphocyte count of  $1.5\pm 1.2$   $10^9$ /L (range, 0.3-6.6). In  
43  
44 the risk of malnutrition group with an MNA score of 17-23.5 ( $n=150$ ), average serum  
45  
46 albumin was  $37.9\pm 5.6$  g/L (range, 21.6-70), average prealbumin  $192.3\pm 61.8$  mg/L  
47  
48  
49  
50  
51  
52  
53  
54  
55  
56  
57  
58  
59  
60



(range, 8-380) and average hemoglobin 120.2±22.0 mg/L (range, 55-181), an average lymphocyte count of 1.3±0.56 10<sup>9</sup>/L (range, 0.2-2.9). The group with MNA≥24 (n=180) had an average serum albumin concentration of 39.8±3.8 g/L (range, 29.3-54), an average prealbumin of 216.7±54.4 mg/L (range, 25-337) and an average hemoglobin of 127.6±15.3 mg/L (range, 81-173), an average lymphocyte count of 1.5±0.7 10<sup>9</sup>/L (range, 0.3-4.3; figure 2a, additional table 1).

Similarly, ALB, PAB and Hb gradually declined with increasing risk of malnutrition according to NRS2002 results ( $P<0.001$ , figure 2b). In under-nourished patients (NRS2002: 3-7, n=174), average serum albumin was 35.1±5.6 g/L (range, 21.6-50.2), average prealbumin 148.5±79.3 mg/L (range, 17-339) and average hemoglobin 113.3±23.6 mg/L (range, 55-181). In the normal nutritional state group (NRS2002: 0-2, n=251), the results were: albumin 39.4±4.5 g/L (range, 26.4-70), prealbumin 210.2±56.1 mg/L (range, 8-380) and hemoglobin 125.8±16.2 mg/L (range, 72-173). In contrast, no difference in lymphocyte count was found in both groups ( $P=0.089$ , figure 2b, additional table 1).

Table 4 showed the Pearson correlation coefficients of MNA and NRS2002 scores with BMI, serum parameters and LOS. BMI, Hb, ALB and PAB correlated negatively with malnutrition scores of NRS2002, while correlated positively with the MNA scores ( $P<0.001$ ). There was an inverse correlation between age and the two tools ( $P<0.001$ ). Besides, a significant association between both tools and LOS was demonstrated ( $P<0.05$ ). No correlation was found between TLC and the two tools.

Table 5 showed the simple linear regression of LOS. There was a linear

1  
2  
3 correlation between the MNA scores and LOS ( $P<0.05$ ), so was the NRS2002 scores  
4  
5  
6 ( $P<0.01$ ).  
7  
8  
9

## 10 11 12 13 14 15 16 17 **DISCUSSION**

18 Based on the current study, the nutritional health of older inpatients were  
19  
20 assessed using NRS2002, MNA, BMI, Hb, TLC, ALB and PAB. We found the overall  
21  
22 prevalence of malnutrition risk for the enrolled older patients ranged from 23.7% to  
23  
24 58.6%. The highest prevalence of malnutrition risk was detected by MNA and the  
25  
26 lowest by BMI. These results illustrated the differences in nutritional risk detected by  
27  
28 different screening tools.  
29  
30  
31

32 Biochemical markers have many advantages in assessing the nutritional status,  
33  
34 such as fast application, low cost. They can also be incorporated into the routine of  
35  
36 clinical application. Albumin, the most abundant plasmatic protein, is commonly used  
37  
38 in the assessment of malnutrition.<sup>36</sup> In several of studies, low serum ALB correlated  
39  
40 with longer hospitalization, medical complications, and increased mortality.<sup>36-38</sup>  
41  
42 Nevertheless, its value is limited by the long half-life (14-20 days), inflammation, the  
43  
44 impairment of hepatic or renal, and possibly aging itself.<sup>27</sup> In the present study,  
45  
46 prevalence of malnutrition detected by ALB is lower than MNA and NRS2002, which  
47  
48 suggest that ALB was not suitable for assessing malnutrition in our patients. The  
49  
50 reason may be its long half-life to make it insensitive to malnutrition. In contrast, a  
51  
52  
53  
54  
55  
56  
57  
58  
59  
60

1  
2  
3 study by Covinsky *et al*<sup>39</sup> showed ALB is highly sensitive but low specific in the  
4  
5 diagnosis of malnutrition in the hospitalized older adults.  
6  
7

8 Prealbumin has been regarded as a more sensitive marker than albumin for acute  
9  
10 nutritional changes, as it has a shorter half-life (2-3 days). However, its functions in  
11  
12 nutritional screening and mortality prediction are controversial.<sup>40-43</sup> In our study,  
13  
14 prealbumin levels showed a great decline with deteriorating nutrition status assessed  
15  
16 by both NRS2002 and MNA. The correlation between serum prealbumin and MNA  
17  
18 consistent with one study<sup>44</sup>, but in contrast with another report.<sup>42</sup> This latter study had  
19  
20 a small sample size (23 older patients), which may explain the discrepancies. Similar  
21  
22 to serum albumin, the usage of prealbumin in predicting malnutrition is limited due to  
23  
24 systemic inflammatory diseases.<sup>41, 45</sup>  
25  
26  
27  
28  
29

30 Hemoglobin has been shown to decrease with progressive malnutrition.<sup>46, 47</sup> This  
31  
32 relationship, consistent with a recent analysis performed in Northern China<sup>29</sup>, is found  
33  
34 in our study. Total lymphocyte count was assumed to be suitable in screening test for  
35  
36 assessing malnutrition and being an indicator of a poor prognosis.<sup>27</sup> In agreement with  
37  
38 Lei *et al*<sup>48</sup>, we found a significant correlation between TLC and MNA. However, no  
39  
40 correlation was found between NRS2002 and TLC, coincidence with a previous  
41  
42 study.<sup>29</sup>  
43  
44  
45  
46

47 The prevalence of malnutrition diagnosed by BMI was far below that detected by  
48  
49 MNA. Consistent with findings from another study<sup>49</sup>, this study suggest malnutrition  
50  
51 is also under diagnosed when using BMI as the sole criteria. The reason is most likely  
52  
53 related to water-sodium retention in patients, leading to an overestimation of their true  
54  
55  
56  
57  
58  
59  
60

1  
2  
3 weight.<sup>50</sup> In spite of this, low BMI was significantly associated with mortality.<sup>51</sup>  
4  
5

6 Our study revealed that NRS2002 and MNA, in moderate agreement with each  
7  
8 other, were consistently associated with age, BMI, Hb, ALB and PAB. Nevertheless,  
9  
10 the MNA identified more patients with or at risk of malnutrition than did the  
11  
12 NRS2002. The lower percentage of malnutrition classified by NRS2002 may be  
13  
14 explained in several ways. First, the NRS2002 mainly consider the influence of acute  
15  
16 diseases to nutritional status, while the MNA take chronic long-term condition into  
17  
18 account, such as psychological factors and the BMI. Psychological factors may play a  
19  
20 large role in the nutritional status of older inpatients. In addition, we categorized  
21  
22 undernutrition as  $NRS2002 \geq 3$ , while patients with a score of 1-2 indicates low risk of  
23  
24 malnutrition.<sup>52</sup> This may have underestimated the percentage of malnutrition.  
25  
26 Moreover, our study subjects were internal medical patients, of which the proportion  
27  
28 of overweight and obesity was high. The NRS2002 take  $BMI < 18.5 \text{ kg/m}^2$  as one of  
29  
30 the criteria, which leads to a lower proportion of malnutrition with NRS2002 than that  
31  
32 of MNA. Our results are in agreement with findings from Raslan *et al*,<sup>5</sup> but differ  
33  
34 from the study conducted by Drescher *et al*.<sup>52</sup> The latter study was conducted in older  
35  
36 patients with acute disease, which may explain the difference.  
37  
38  
39  
40  
41  
42  
43  
44

45 Norman *et al* suggested that there is a close relationship between the degree of  
46  
47 malnutrition and LOS.<sup>53</sup> In the present study, we found the linear relation between  
48  
49 both instruments (MNA and NRS2002) and LOS. Our findings corroborated those of  
50  
51 the study by Bauer *et al*,<sup>54</sup> which showed longer hospital stay was associated with  
52  
53 malnutrition assessed by the MNA. We conclude, therefore, that in Chinese geriatric  
54  
55  
56  
57  
58  
59  
60

1  
2  
3 inpatients, the NRS2002 and MNA might reflect malnutrition or the studied  
4  
5 biochemical parameters, as well as predicting the length of hospitalization, however,  
6  
7 the MNA was available for identifying most of the patients with or at risk of  
8  
9 malnutrition.  
10  
11  
12  
13  
14  
15  
16  
17

### 18 **Limitations**

19  
20 Our study has some limitations. First, a consensus statement with diagnostic criteria  
21  
22 for malnutrition was proposed in 2015<sup>55</sup> after our study initiated, thus it was not  
23  
24 utilized in our study. Second, BMI and age were part of the screening tools, therefore  
25  
26 already correlated with the MNA and NRS-2002 assessment. In addition, the small  
27  
28 sample size of women may limit the generalizability of the results. Finally, regarding  
29  
30 the cross-classification of MNA, more patients will be categorized as at risk since the  
31  
32 two groups malnourished and at risk are combined, this may contribute to the low  
33  
34 Kappa value between the two instruments.  
35  
36  
37  
38  
39

### 40 **CONCLUSION**

41  
42 In summary, the results of the present study show a high prevalence of  
43  
44 malnutrition risk in Chinese geriatric hospitalized patients. Although the nutritional  
45  
46 risk varied depending on the method used, both NRS2002 and MNA correlated with  
47  
48 each other and with age, BMI and laboratory parameters. Besides, both tools were  
49  
50 found to be a good predictor of the length of hospitalization. Therefore, this study  
51  
52 suggests NRS2002 and MNA both were suitable to screen malnutrition risk among  
53  
54  
55  
56  
57  
58  
59  
60

1  
2  
3 Chinese geriatric inpatients. We recommend one of them to be used in admission.  
4  
5  
6  
7  
8  
9

10  
11 **Acknowledgements** Thanks to the participating volunteer patients, the local research  
12 ethics committee and the individual researchers, clinicians and nurses for their  
13 participation in the data collection.  
14  
15  
16  
17  
18  
19  
20

21  
22 **Contributors** JPM, XQQ and HLZ are main contributors to the design of the present  
23 study. JPM and XQQ contributed to the study conception and design. HLZ and CTZ,  
24 took part in the discussion and modification of the study design. HZ, MY, LYS, QHG,  
25 GYZ, QJM, YXW, and SGL contributed to the study conception. XQQ, HZ, MY, LYS,  
26 QHG, GYZ, QJM, YXW and SGL were involved in the acquisition of data. JPM and  
27 XQQ contributed to the drafting of the manuscript. HLZ and CTZ were involved in  
28 the critical revision. All the authors were involved in the analysis and interpretation of  
29 the data and gave their final approval.  
30  
31  
32  
33  
34  
35  
36  
37  
38  
39  
40  
41  
42  
43  
44  
45

46 **Funding** This project was funded by the National Natural Science Foundation of  
47 China (Grant No. 81400255).  
48  
49  
50  
51  
52  
53  
54

55 **Competing interests** None declared.  
56  
57  
58  
59  
60

1  
2  
3  
4  
5  
6  
7 **Ethics approval** Ethics Review Board of Tongji Hospital, Tongji Medical College,  
8  
9  
10 Huazhong University of Science and Technology (TJ-C20141112).

11  
12  
13  
14  
15 **Provenance and peer review** Not commissioned; externally peer reviewed.

16  
17  
18  
19  
20  
21  
22 **Data sharing statement** No additional data are available.

23  
24  
25  
26  
27  
28 **Open Access** This is an Open Access article distributed in accordance with the  
29  
30 Creative Commons Attribution Non Commercial (CC BY-NC 4.0) license, which  
31  
32 permits others to distribute, remix, adapt, build upon this work non-commercially, and  
33  
34 license their derivative works on different terms, provided the original work is  
35  
36 properly cited and the use is non-commercial. See:  
37  
38 <http://creativecommons.org/licenses/by-nc/4.0/>  
39  
40  
41  
42  
43  
44  
45  
46  
47  
48  
49  
50  
51  
52  
53  
54  
55  
56  
57  
58  
59  
60

1  
2  
3 **Figure legend**

4 **Figure 1** Flow diagram of participant inclusion and exclusion.

5  
6  
7 **Figure 2** MNA (a) and NRS2002 (b) referring to serum albumin, prealbumin,  
8 hemoglobin and blood lymphocytes count respectively.  
9

10  
11  
12  
13  
14  
15  
16  
17  
18  
19  
20  
21  
22  
23  
24  
25  
26  
27  
28  
29  
30  
31  
32  
33  
34  
35  
36  
37  
38  
39  
40  
41  
42  
43  
44  
45  
46  
47  
48  
49  
50  
51  
52  
53  
54  
55  
56  
57  
58  
59  
60

For peer review only



**REFERENCES**

1. Guigoz Y. The Mini Nutritional Assessment (MNA) review of the literature--What does it tell us? *J Nutr Health Aging*. 2006;10:466-85; discussion 485-7.
2. Chang SF. Frailty Is a Major Related Factor for at Risk of Malnutrition in Community-Dwelling Older Adults. *J Nurs Scholarsh*. 2017;49:63-72.
3. Lumale S. [Nutritional management of elderly people, everyone's concern]. *Rev Infirm*. 2017;66:25-26.
4. Lesourd B. Nutritional factors and immunological ageing. *Proc Nutr Soc*. 2006;65:319-25.
5. Raslan M, Gonzalez MC, Dias MC, *et al*. Comparison of nutritional risk screening tools for predicting clinical outcomes in hospitalized patients. *Nutrition*. 2010;26:721-6.
6. Ehwerhemuepha L, Bendig D, Steele C, *et al*. The Effect of Malnutrition on the Risk of Unplanned 7-Day Readmission in Pediatrics. *Hosp Pediatr*. 2018.
7. Ahmed N, Choe Y, Mustad VA, *et al*. Impact of malnutrition on survival and healthcare utilization in Medicare beneficiaries with diabetes: a retrospective cohort analysis. *BMJ Open Diabetes Res Care*. 2018;6:e000471.
8. Sharma Y, Miller M, Kaambwa B, *et al*. Malnutrition and its association with readmission and death within 7 days and 8-180 days postdischarge in older patients: a prospective observational study. *BMJ Open*. 2017;7:e018443.
9. Khalatbari-Soltani S, Marques-Vidal P. The economic cost of hospital malnutrition in Europe; a narrative review. *Clin Nutr ESPEN*. 2015;10:e89-e94.
10. Bouillanne O, Curis E, Hamon-Vilcot B, *et al*. Impact of protein pulse feeding on lean mass in malnourished and at-risk hospitalized elderly patients: a randomized controlled trial. *Clin Nutr*. 2013;32:186-92.
11. Ballesteros-Pomar MD, Martinez Llinas D, Goates S, *et al*. Cost-Effectiveness of a Specialized Oral Nutritional Supplementation for Malnourished Older Adult Patients in Spain. *Nutrients*. 2018;10.
12. Racic M, Ivkovic N, Kusmuk S. [Screening of Nutritional Status among Elderly People at Family Medicine]. *Acta Med Croatica*. 2015;69:347-56.
13. Abd Aziz NAS, Teng N, Abdul Hamid MR, *et al*. Assessing the nutritional status of hospitalized elderly. *Clin Interv Aging*. 2017;12:1615-1625.
14. Elia M, Stratton R. On the ESPEN guidelines for nutritional screening 2002. *Clin Nutr*. 2004;23:131-2.
15. Kondrup J, Rasmussen HH, Hamberg O, *et al*. Nutritional risk screening (NRS 2002): a new method based on an analysis of controlled clinical trials. *Clin Nutr*. 2003;22:321-36.
16. Kondrup J, Allison SP, Elia M, *et al*. ESPEN guidelines for nutrition screening 2002. *Clin Nutr*. 2003;22:415-21.
17. Guigoz Y, Vellas B, Garry PJ. Assessing the nutritional status of the elderly: The Mini Nutritional Assessment as part of the geriatric evaluation. *Nutr Rev*. 1996;54:S59-65.
18. Bleda MJ, Bolibar I, Pares R, *et al*. Reliability of the mini nutritional assessment

- (MNA) in institutionalized elderly people. *J Nutr Health Aging*. 2002;6:134-7.
19. Bauer JM, Kaiser MJ, Anthony P, *et al*. The Mini Nutritional Assessment--its history, today's practice, and future perspectives. *Nutr Clin Pract*. 2008;23:388-96.
  20. Soderstrom L, Rosenblad A, Adolfsson ET, *et al*. Nutritional status predicts preterm death in older people: a prospective cohort study. *Clin Nutr*. 2014;33:354-9.
  21. Dent E, Visvanathan R, Piantadosi C, *et al*. Use of the Mini Nutritional Assessment to detect frailty in hospitalised older people. *J Nutr Health Aging*. 2012;16:764-7.
  22. Cabre M, Ferreiro C, Arus M, *et al*. Evaluation of CONUT for Clinical Malnutrition Detection and Short-Term Prognostic Assessment in Hospitalized Elderly People. *J Nutr Health Aging*. 2015;19:729-33.
  23. Chavarro-Carvajal D, Reyes-Ortiz C, Samper-Ternent R, *et al*. Nutritional assessment and factors associated to malnutrition in older adults: a cross-sectional study in Bogota, Colombia. *J Aging Health*. 2015;27:304-19.
  24. Kyle UG, Kossovsky MP, Karsegard VL, *et al*. Comparison of tools for nutritional assessment and screening at hospital admission: a population study. *Clin Nutr*. 2006;25:409-17.
  25. Kaiser MJ, Bauer JM, Ramsch C, *et al*. Validation of the Mini Nutritional Assessment short-form (MNA-SF): a practical tool for identification of nutritional status. *J Nutr Health Aging*. 2009;13:782-8.
  26. Sergi G, Coin A, Enzi G, *et al*. Role of visceral proteins in detecting malnutrition in the elderly. *Eur J Clin Nutr*. 2006;60:203-9.
  27. Omran ML, Morley JE. Assessment of protein energy malnutrition in older persons, Part II: Laboratory evaluation. *Nutrition*. 2000;16:131-40.
  28. Omran ML, Morley JE. Assessment of protein energy malnutrition in older persons, part I: History, examination, body composition, and screening tools. *Nutrition*. 2000;16:50-63.
  29. Zhou J, Wang M, Wang H, *et al*. Comparison of two nutrition assessment tools in surgical elderly inpatients in Northern China. *Nutr J*. 2015;14:68.
  30. Thoresen L, Frykholm G, Lydersen S, *et al*. Nutritional status, cachexia and survival in patients with advanced colorectal carcinoma. Different assessment criteria for nutritional status provide unequal results. *Clin Nutr*. 2013;32:65-72.
  31. Wei J, Chen W, Zhu M, *et al*. Guidelines for parenteral and enteral nutrition support in geriatric patients in China. *Asia Pac J Clin Nutr*. 2015;24:336-46.
  32. Jacobsen EL, Brovold T, Bergland A, *et al*. Prevalence of factors associated with malnutrition among acute geriatric patients in Norway: a cross-sectional study. *BMJ Open*. 2016;6:e011512.
  33. Guigoz Y, Vellas B. The Mini Nutritional Assessment (MNA) for grading the nutritional state of elderly patients: presentation of the MNA, history and validation. *Nestle Nutr Workshop Ser Clin Perform Programme*. 1999;1:3-11; discussion 11-2.
  34. Blackburn GL, Bistrian BR, Maini BS, *et al*. Nutritional and metabolic

- assessment of the hospitalized patient. *JPEN J Parenter Enteral Nutr.* 1977;1:11-22.
35. Cooperative Meta-Analysis Group of the Working Group on Obesity in China. International life sciences institute, focal point in China: the recommendation of Chinese adult body mass index classification. *Zhonghua Yu Fang Yi Xue Za Zhi.* 2001;35:349-50.
36. Cabrerizo S, Cuadras D, Gomez-Busto F, *et al.* Serum albumin and health in older people: Review and meta analysis. *Maturitas.* 2015;81:17-27.
37. O'Daly BJ, Walsh JC, Quinlan JF, *et al.* Serum albumin and total lymphocyte count as predictors of outcome in hip fractures. *Clin Nutr.* 2010;29:89-93.
38. Chiu PF, Tsai CC, Wu CL, *et al.* Trajectories of Serum Albumin Predict Survival of Peritoneal Dialysis Patients: A 15-year Follow-Up Study. *Medicine (Baltimore).* 2016;95:e3202.
39. Covinsky KE, Covinsky MH, Palmer RM, *et al.* Serum albumin concentration and clinical assessments of nutritional status in hospitalized older people: different sides of different coins? *Journal of the American Geriatrics Society.* 2002;50:631-7.
40. Carriere I, Dupuy AM, Lacroux A, *et al.* Biomarkers of inflammation and malnutrition associated with early death in healthy elderly people. *Journal of the American Geriatrics Society.* 2008;56:840-6.
41. Devoto G, Gallo F, Marchello C, *et al.* Prealbumin serum concentrations as a useful tool in the assessment of malnutrition in hospitalized patients. *Clinical chemistry.* 2006;52:2281-5.
42. Langkamp-Henken B, Hudgens J, Stechmiller JK, *et al.* Mini nutritional assessment and screening scores are associated with nutritional indicators in elderly people with pressure ulcers. *J Am Diet Assoc.* 2005;105:1590-6.
43. Kanda M, Mizuno A, Tanaka C, *et al.* Nutritional predictors for postoperative short-term and long-term outcomes of patients with gastric cancer. *Medicine (Baltimore).* 2016;95:e3781.
44. Vellas B, Guigoz Y, Baumgartner M, *et al.* Relationships between nutritional markers and the mini-nutritional assessment in 155 older persons. *Journal of the American Geriatrics Society.* 2000;48:1300-9.
45. Lopez-Hellin J, Baena-Fustegueras JA, Schwartz-Riera S, *et al.* Usefulness of short-lived proteins as nutritional indicators surgical patients. *Clin Nutr.* 2002;21:119-25.
46. Wham CA, Teh RO, Robinson M, *et al.* What is associated with nutrition risk in very old age? *J Nutr Health Aging.* 2011;15:247-51.
47. Weng CH, Hsu CW, Hu CC, *et al.* Association Between Hemodiafiltration and Hypoalbuminemia in Middle-Age Hemodialysis Patients. *Medicine (Baltimore).* 2016;95:e3334.
48. Lei Z, Qingyi D, Feng G, *et al.* Clinical study of mini-nutritional assessment for older Chinese inpatients. *J Nutr Health Aging.* 2009;13:871-5.
49. Antaki F, French MM, Moonka DK, *et al.* Bioelectrical impedance analysis for the evaluation of hepatic fibrosis in patients with chronic hepatitis C infection.

- 1  
2  
3 *Dig Dis Sci.* 2008;53:1957-60.
- 4 50. Roongpisuthipong C, Sobhonslidsuk A, Nantiruj K, *et al.* Nutritional assessment  
5 in various stages of liver cirrhosis. *Nutrition.* 2001;17:761-5.
- 6 51. Akinyemiju T, Meng Q, Vin-Raviv N. Association between body mass index and  
7 in-hospital outcomes: Analysis of the nationwide inpatient database. *Medicine*  
8 *(Baltimore).* 2016;95:e4189.
- 9 52. Drescher T, Singler K, Ulrich A, *et al.* Comparison of two malnutrition risk  
10 screening methods (MNA and NRS 2002) and their association with markers of  
11 protein malnutrition in geriatric hospitalized patients. *Eur J Clin Nutr.*  
12 2010;64:887-93.
- 13 53. Norman K, Pichard C, Lochs H, *et al.* Prognostic impact of disease-related  
14 malnutrition. *Clin Nutr.* 2008;27:5-15.
- 15 54. Bauer JM, Vogl T, Wicklein S, *et al.* Comparison of the Mini Nutritional  
16 Assessment, Subjective Global Assessment, and Nutritional Risk Screening  
17 (NRS 2002) for nutritional screening and assessment in geriatric hospital patients.  
18 *Z Gerontol Geriatr.* 2005;38:322-7.
- 19 55. Cederholm T, Bosaeus I, Barazzoni R, *et al.* Diagnostic criteria for malnutrition -  
20 An ESPEN Consensus Statement. *Clin Nutr.* 2015;34:335-40.
- 21  
22  
23  
24  
25  
26  
27  
28  
29  
30  
31  
32  
33  
34  
35  
36  
37  
38  
39  
40  
41  
42  
43  
44  
45  
46  
47  
48  
49  
50  
51  
52  
53  
54  
55  
56  
57  
58  
59  
60

**Table 1** Characteristic of study participants

| Variable                                        | All subjects (n=425)  |
|-------------------------------------------------|-----------------------|
| Age (year)                                      | 81.2±5.9 (70-98)      |
| Gender                                          |                       |
| Male                                            | 68.9% (293)           |
| Female                                          | 31.1% (132)           |
| Height (m)                                      | 1.6±0.1 (1.4-1.8)     |
| Weight (kg)                                     | 62.9±11.5 (28.4-92.0) |
| Body mass index (kg/m <sup>2</sup> )            | 23.2±3.7 (11.1-34.1)  |
| Length of hospital stay (day)                   | 21.9±13.8 (4-133)     |
| Primary cause of admission to hospital          |                       |
| Cardiac disease                                 | 160 (37.6%)           |
| Pulmonary infection                             | 84 (19.8%)            |
| Hypertension                                    | 76 (17.9%)            |
| Cerebrovascular disease                         | 45 (10.6%)            |
| Digestive disease                               | 25 (5.9%)             |
| Malignancy                                      | 19 (4.5%)             |
| Others                                          | 16 (3.8%)             |
| Comorbidities                                   |                       |
| Hypertension                                    | 210 (49.4%)           |
| Diabetes mellitus                               | 101 (23.8%)           |
| Cardiac disease (including atrial fibrillation) | 94 (22.1%)            |
| Cerebrovascular disease                         | 30 (7.1%)             |

Values are mean ± standard deviation (with ranges in brackets) or % (numbers), respectively.

**Table 2** Nutritional status (% , n) of 425 patients classified by NRS2002, MNA, BMI and serum parameters

|             | <b>Under-nourished</b> | <b>Well-nourished</b> |
|-------------|------------------------|-----------------------|
| NRS2002     | 40.9% (174)            | 59.1% (251)           |
| MNA         | 58.6% (249)            | 41.4% (176)           |
| BMI         | 23.7% (93)             | 76.3% (300)           |
| ALB         | 28.7% (122)            | 71.3% (303)           |
| PAB         | 47.3% (70)             | 52.7% (78)            |
| Hb (male)   | 41.7% (121)            | 58.3% (169)           |
| Hb (female) | 25.6% (33)             | 74.4% (96)            |
| TLC         | 35.9% (149)            | 64.1% (266)           |

ALB = albumin, BMI = Body mass index, Hb = hemoglobin, MNA = Mini-Nutritional Assessment, NRS2002 = Nutritional Risk Screening 2002, PAB = prealbumin, TLC = total lymphocyte count. Under-nourished (malnourished + at risk of malnutrition).

**Table 3** Cross-classification

| MNA             | NRS2002         |                | Total |
|-----------------|-----------------|----------------|-------|
|                 | Under-nourished | Well-nourished |       |
| Under-nourished | 159             | 90             | 249   |
| Well-nourished  | 15              | 161            | 176   |
| Total           | 174             | 251            | 425   |
| Kappa           | 0.521           |                |       |
| <i>P</i>        | <0.001          |                |       |

Number of patients classified into two categories according to MNA and NRS, respectively. MNA = Mini-Nutritional assessment, NRS2002 = Nutritional risk score 2002. Under-nourished: malnutrition + at risk of malnutrition.

**Table 4** Pearson correlation coefficients of MNA and NRS2002 scores with BMI, serum parameters and LOS

|         | MNA      |          | NRS2002  |          |
|---------|----------|----------|----------|----------|
|         | <i>r</i> | <i>p</i> | <i>r</i> | <i>p</i> |
| Age     | -0.239   | <0.001   | 0.238    | <0.001   |
| BMI     | 0.578    | <0.001   | -0.347   | <0.001   |
| Hb      | 0.387    | <0.001   | -0.321   | <0.001   |
| TLC     | -0.002   | 0.966    | 0.011    | 0.819    |
| ALB     | 0.501    | <0.001   | -0.383   | <0.001   |
| PAB     | 0.481    | <0.001   | -0.332   | <0.001   |
| LOS     | -0.109   | 0.048    | 0.178    | 0.001    |
| NRS2002 | -0.640   | <0.001   | —        | —        |

ALB = albumin, BMI = body mass index, Hb = hemoglobin, LOS = length of hospital stay, MNA = Mini-Nutritional Assessment, NRS2002 = Nutritional Risk Screening 2002, PAB = prealbumin, TLC = total lymphocyte count.



**Table 5** The simple linear regression analysis of LOS

|         | B      | SE    | $\beta$ | t      | P     | 95%CI         | R <sup>2</sup> | F      |
|---------|--------|-------|---------|--------|-------|---------------|----------------|--------|
| MNA     | -0.261 | 0.131 | -0.109  | -1.987 | <0.05 | -0.519,-0.003 | 0.012          | 3.949  |
| NRS2002 | 1.891  | 0.575 | 0.178   | 3.291  | <0.01 | 0.761,3.022   | 0.032          | 10.834 |

LOS = length of hospital stay, MNA = Mini-Nutritional Assessment, NRS2002=Nutritional Risk Screening 2002.

For peer review only

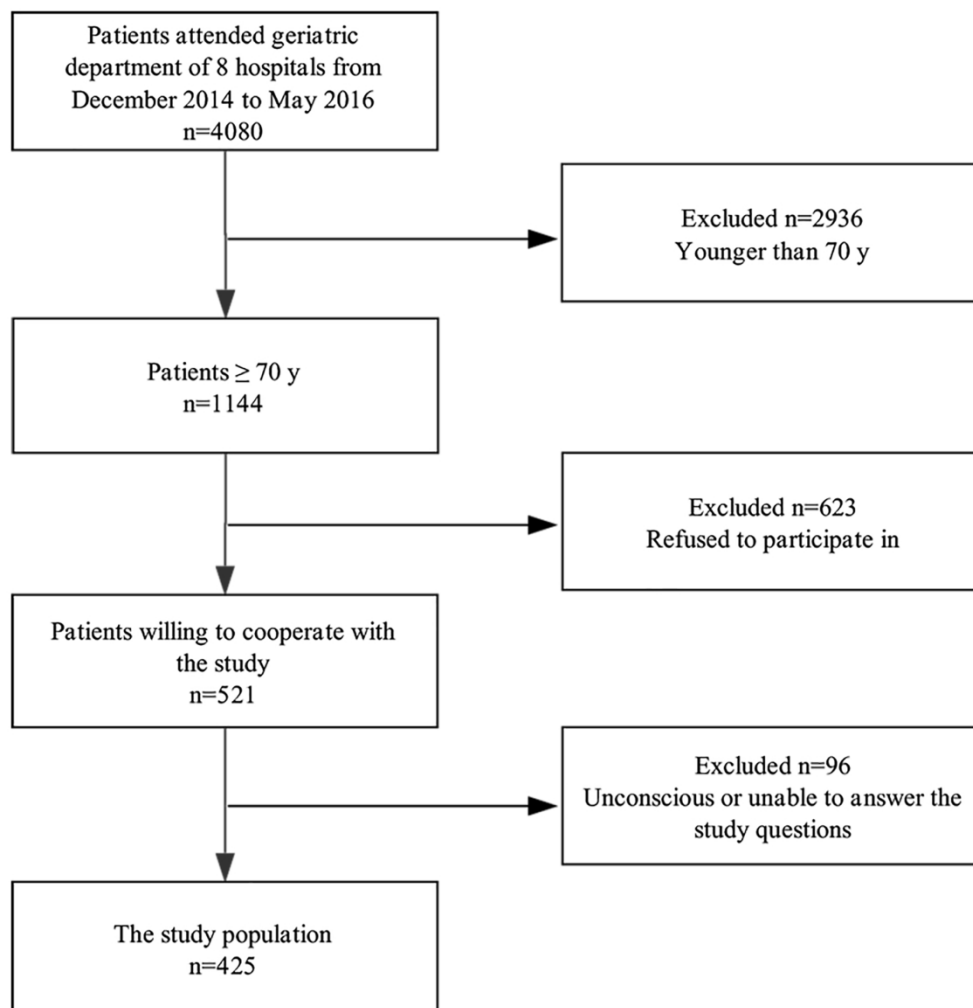

Figure 1 Flow diagram of participant inclusion and exclusion.

167x172mm (300 x 300 DPI)

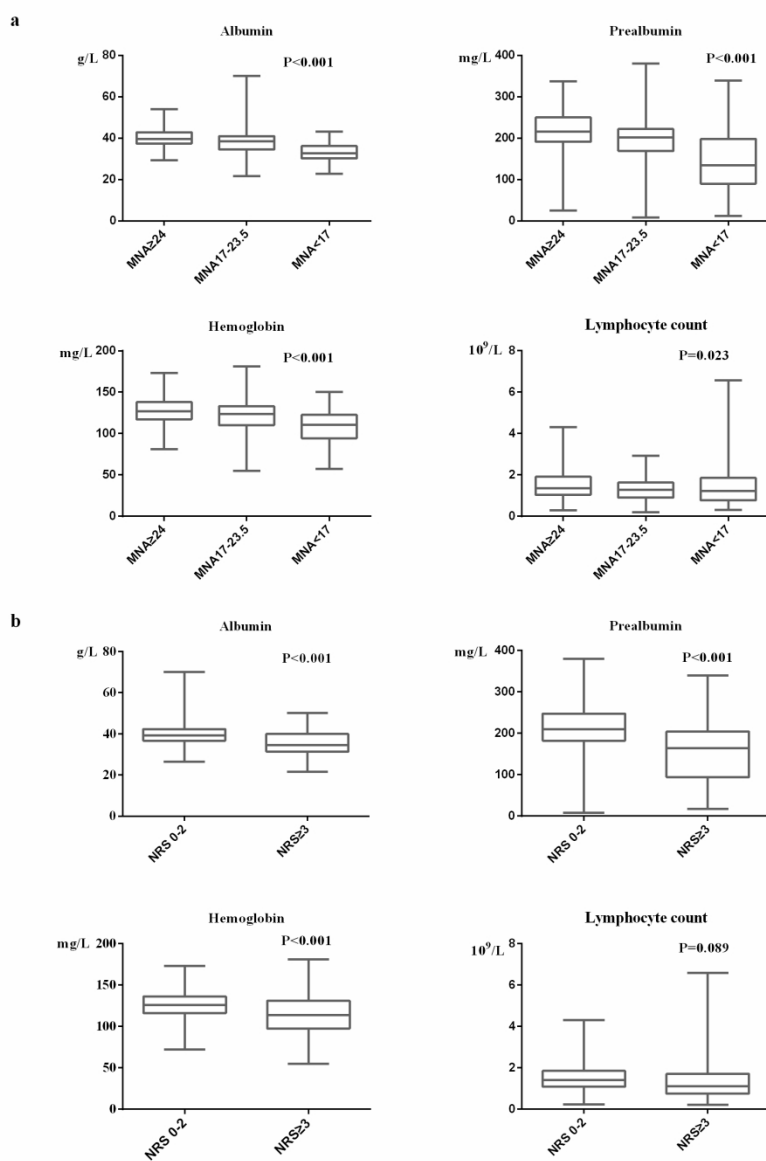

Figure 2 MNA (a) and NRS2002 (b) referring to serum albumin, prealbumin, hemoglobin and blood lymphocytes count respectively.

175x262mm (300 x 300 DPI)

**Additional table 1** Nutritional parameters of study participants classified by MNA and NRS2002

|         | ALB (g/L)               | PAB (mg/L)             | Hb (g/L)                 | TLC ( $10^9/L$ )     |
|---------|-------------------------|------------------------|--------------------------|----------------------|
| MNA     |                         |                        |                          |                      |
| <17     | 33.3±4.8<br>(22.8-43.2) | 140.8±81.7<br>(12-339) | 109.0±20.8<br>(57-150.2) | 1.5±1.2<br>(0.3-6.6) |
| 17-23.5 | 37.9±5.6<br>(21.6-70)   | 192.3±61.8<br>(8-380)  | 120.2±22.0<br>(55-181)   | 1.3±0.6<br>(0.2-2.9) |
| ≥24     | 39.8±3.8<br>(29.3-54)   | 216.7±54.4<br>(25-337) | 127.6±15.3<br>(81-173)   | 1.5±0.7<br>(0.3-4.3) |
| NRS2002 |                         |                        |                          |                      |
| ≥3      | 35.1±5.6<br>(21.6-50.2) | 148.5±79.3<br>(17-339) | 113.3±23.6<br>(55-181)   | 1.4±1.0<br>(0.2-6.6) |
| 0-2     | 39.4±4.5<br>(26.4-70)   | 210.2±56.1<br>(8-380)  | 125.8±16.2<br>(72-173)   | 1.5±0.6<br>(0.2-4.3) |

ALB = albumin, PAB = prealbumin, Hb = hemoglobin, TLC = total lymphocyte count, MNA = Mini-Nutritional Assessment, NRS2002=Nutritional Risk Screening 2002.

Values are mean ± standard deviation (with ranges in brackets)

# BMJ Open

## Comparison of two malnutrition risk screening tools with nutritional biochemical parameters, BMI and length of stay in Chinese geriatric inpatients: a multicenter, cross-sectional study

|                                 |                                                                                                                                                                                                                                                                                                                                                                                                                                                                                                                                                                                                                                                                                                                                                                                                                                                                                                                                                                                                                                                                                                                                                                                                                                                                                                                                                                                                                                                                                                                                                                                                                                                                                       |
|---------------------------------|---------------------------------------------------------------------------------------------------------------------------------------------------------------------------------------------------------------------------------------------------------------------------------------------------------------------------------------------------------------------------------------------------------------------------------------------------------------------------------------------------------------------------------------------------------------------------------------------------------------------------------------------------------------------------------------------------------------------------------------------------------------------------------------------------------------------------------------------------------------------------------------------------------------------------------------------------------------------------------------------------------------------------------------------------------------------------------------------------------------------------------------------------------------------------------------------------------------------------------------------------------------------------------------------------------------------------------------------------------------------------------------------------------------------------------------------------------------------------------------------------------------------------------------------------------------------------------------------------------------------------------------------------------------------------------------|
| Journal:                        | <i>BMJ Open</i>                                                                                                                                                                                                                                                                                                                                                                                                                                                                                                                                                                                                                                                                                                                                                                                                                                                                                                                                                                                                                                                                                                                                                                                                                                                                                                                                                                                                                                                                                                                                                                                                                                                                       |
| Manuscript ID                   | bmjopen-2018-022993.R2                                                                                                                                                                                                                                                                                                                                                                                                                                                                                                                                                                                                                                                                                                                                                                                                                                                                                                                                                                                                                                                                                                                                                                                                                                                                                                                                                                                                                                                                                                                                                                                                                                                                |
| Article Type:                   | Research                                                                                                                                                                                                                                                                                                                                                                                                                                                                                                                                                                                                                                                                                                                                                                                                                                                                                                                                                                                                                                                                                                                                                                                                                                                                                                                                                                                                                                                                                                                                                                                                                                                                              |
| Date Submitted by the Author:   | 28-Aug-2018                                                                                                                                                                                                                                                                                                                                                                                                                                                                                                                                                                                                                                                                                                                                                                                                                                                                                                                                                                                                                                                                                                                                                                                                                                                                                                                                                                                                                                                                                                                                                                                                                                                                           |
| Complete List of Authors:       | <p>Miao, Jian-Ping; Tongji Hospital of Tongji Medical College of Huazhong University of Science and Technology, Department of Geriatrics; Clinical Research Center for Geriatric Prevention and Treatment and Health Medicine in Hubei Province</p> <p>Quan, Xiao-Qing; Tongji Hospital of Tongji Medical College of Huazhong University of Science and Technology, Department of Geriatrics; Clinical Research Center for Geriatric Prevention and Treatment and Health Medicine in Hubei Province</p> <p>Zhang, Cun-Tai; Tongji Hospital of Tongji Medical College of Huazhong University of Science and Technology, Department of Geriatrics; Clinical Research Center for Geriatric Prevention and Treatment and Health Medicine in Hubei Province</p> <p>Zhu, Hong; the Central Hospital of Wuhan University, Department of Geriatrics</p> <p>Ye, Mei; Zhongnan Hospital of Wuhan University, Department of Geriatrics</p> <p>Shen, Li-Ya; Wuhan No. 6 Hospital, Department of Geriatrics</p> <p>Guo, Qiu-Hui; Wuhan No. 6 Hospital, Department of Geriatrics</p> <p>Zhu, Gang-Yan; Hubei General Hospital, Department of Geriatrics</p> <p>Mei, Qi-Jian; General Hospital of the Yangtze River Shipping</p> <p>Wu, Yan-Xia; Wuhan No 1 Hospital, Department of Geriatrics</p> <p>Li, Shu-Guo; First Clinical Medical College, Three Gorges University &amp; Yichang Central People's Hospital, Department of Geriatrics</p> <p>Zhou, Hong-Lian; Tongji Hospital of Tongji Medical College of Huazhong University of Science and Technology, Department of Geriatrics; Clinical Research Center for Geriatric Prevention and Treatment and Health Medicine in Hubei Province</p> |
| <b>Primary Subject Heading</b>: | Nutrition and metabolism                                                                                                                                                                                                                                                                                                                                                                                                                                                                                                                                                                                                                                                                                                                                                                                                                                                                                                                                                                                                                                                                                                                                                                                                                                                                                                                                                                                                                                                                                                                                                                                                                                                              |
| Secondary Subject Heading:      | Nutrition and metabolism                                                                                                                                                                                                                                                                                                                                                                                                                                                                                                                                                                                                                                                                                                                                                                                                                                                                                                                                                                                                                                                                                                                                                                                                                                                                                                                                                                                                                                                                                                                                                                                                                                                              |
| Keywords:                       | malnutrition risk, NRS2002, MNA, older patients                                                                                                                                                                                                                                                                                                                                                                                                                                                                                                                                                                                                                                                                                                                                                                                                                                                                                                                                                                                                                                                                                                                                                                                                                                                                                                                                                                                                                                                                                                                                                                                                                                       |
|                                 |                                                                                                                                                                                                                                                                                                                                                                                                                                                                                                                                                                                                                                                                                                                                                                                                                                                                                                                                                                                                                                                                                                                                                                                                                                                                                                                                                                                                                                                                                                                                                                                                                                                                                       |

1  
2  
3  
4  
5  
6  
7  
8  
9  
10  
11  
12  
13  
14  
15  
16  
17  
18  
19  
20  
21  
22  
23  
24  
25  
26  
27  
28  
29  
30  
31  
32  
33  
34  
35  
36  
37  
38  
39  
40  
41  
42  
43  
44  
45  
46  
47  
48  
49  
50  
51  
52  
53  
54  
55  
56  
57  
58  
59  
60

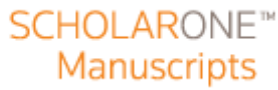

1  
2  
3 **Comparison of two malnutrition risk screening tools with nutritional**  
4 **biochemical parameters, BMI and length of stay in Chinese geriatric inpatients:**  
5 **a multicenter, cross-sectional study**  
6  
7  
8  
9

10 Jian-Ping Miao<sup>1,2,3</sup>, Xiao-Qing Quan<sup>1,2,3</sup>, Cun-Tai Zhang<sup>1,2,3</sup>, Hong Zhu<sup>4</sup>, Mei Ye<sup>5</sup>,  
11 Li-Ya Shen<sup>6</sup>, Qiu-Hui Guo<sup>6</sup>, Gang-Yan Zhu<sup>7</sup>, Qi-Jian Mei<sup>8</sup>, Yan-Xia Wu<sup>9</sup>,  
12 Shu-Guo Li<sup>10</sup>, Hong-Lian Zhou<sup>1,2,3\*</sup>  
13  
14  
15  
16  
17  
18  
19

20 **Running title: Malnutrition screening in Chinese geriatric patients**  
21  
22

- 23 1. Department of Geriatrics, Tongji Hospital, Tongji Medical College, Huazhong  
24 University of Science and Technology;  
25  
26 2. Clinical Research Center for Geriatric Prevention and Treatment and Health  
27 Medicine in Hubei Province  
28  
29 3. Clinical Research Center for Treatment and Rehabilitation of Elderly Multi-Organ  
30 Dysfunction in Wuhan  
31  
32 4. Department of Geriatrics, the Central Hospital of Wuhan University;  
33  
34 5. Department of Geriatrics, Zhongnan Hospital of Wuhan University;  
35  
36 6. Department of Geriatrics, Wuhan No. 6 Hospital;  
37  
38 7. Department of Geriatrics, Hubei General Hospital;  
39  
40 8. Department of Geriatrics, General Hospital of the Yangtze River Shipping;  
41  
42 9. Department of Geriatrics, Wuhan No 1 Hospital;  
43  
44 10. Department of Geriatrics, First Clinical Medical College, Three Gorges University  
45 & Yichang Central People's Hospital.  
46  
47  
48  
49

50 JPM and XQQ contributed equally.  
51  
52  
53

54 Correspondence to Dr Hong-Lian Zhou; zhouhonglian63@163.com  
55  
56  
57  
58  
59  
60

**ABSTRACT**

**Objectives:** The aim of this study was to assess malnutrition risk in Chinese geriatric inpatients with Nutritional Risk Screening (NRS2002) and Mini-Nutritional Assessment (MNA), and to identify the most appropriate nutritional screening tool for these patients.

**Design:** Cross-sectional study.

**Setting:** Eight medical centers in Hubei province, China.

**Participants:** A total of 425 inpatients aged  $\geq 70$  years were consecutively recruited between December 2014 and May 2016.

**Primary and secondary outcome measures:** Nutritional risk was assessed using NRS2002, MNA, anthropometric measurements and biochemical parameters within 24 hours of admission. Comorbidities and length of hospitalization were recorded. Nutritional parameters, BMI and length of hospital stay were employed to compare MNA and NRS2002. Besides, Kappa analysis was used to evaluate the consistency of the two tools.

**Results:** The average age was  $81.2 \pm 5.9$  years (range, 70-98). The prevalence of undernutrition classified by NRS2002 and MNA was 40.9% and 58.6%, respectively. Patients undergoing malnutrition had lower BMI, hemoglobin, albumin and prealbumin ( $P < 0.05$ ), and longer length of hospital stay (LOS) ( $P < 0.05$ ). The NRS2002 showed moderate agreement ( $\kappa = 0.521$ ,  $P < 0.001$ ) with MNA. Both tools presented significant correlation with age, BMI and laboratory parameters ( $P < 0.001$ ). In addition, a significant association between both tools and LOS was found ( $P < 0.05$ ).



Besides, the NRS2002 was not different from MNA for predicting nutritional risk in terms of the area under receiver operating characteristic curve ( $P>0.05$ ).

**Conclusions:** The results show a relatively high prevalence of malnutrition risk in our sample cohort. We found that NRS2002 and MNA both were suitable to screen malnutrition risk among Chinese geriatric inpatients.

### **Strengths and limitations of this study**

- ▶ This study assessed the risk of malnutrition among Chinese elderly inpatients with two different tools (NRS2002 and MNA).
- ▶ The study provides useful information to assess the risk of malnutrition among Chinese elderly inpatients.
- ▶ The consensus statement with diagnostic criteria for malnutrition was proposed in 2015 after our study initiated, and thus it was not utilized in our study.
- ▶ Regarding the cross-classification of MNA, more patients will be categorized as at risk since the two groups malnourished and at risk are combined.
- ▶ In addition to nutritional status, LOS could also be influenced by age, financial situation, comorbidities and so on, which may explain the low  $R^2$  regarding simple linear regression analysis.

**Keywords:** malnutrition risk; NRS2002; MNA; older patients

## INTRODUCTION

Malnutrition is a common condition affecting almost 13-78% of the elderly population.<sup>1</sup> It is highly associated with numerous adverse outcomes including frailty,<sup>2</sup> muscle wasting<sup>3</sup>, weakened immune system<sup>4</sup>, longer hospitalization,<sup>5</sup> increased morbidity<sup>6</sup> and mortality.<sup>7,8</sup> These outcomes contribute to large increases in medical expenditures.<sup>9</sup> Early identification and treatment of malnutrition can lead to better quality of life<sup>10</sup> and improved outcomes<sup>11</sup> in older inpatients. Therefore, it is essential to apply appropriate tools to assess the risk of malnutrition in geriatric patients.

Nutritional risk screening and nutritional assessment tools are readily available nowadays.<sup>12</sup> These tools are used to identify patients with nutritional risk or nutritional deficiencies and to determine if intervention is needed. There are a variety of nutritional risk screening methods,<sup>13</sup> mainly involving anthropometric and biochemical parameters. However, to date, no single tool has been considered as the universal gold standard for the assessment of nutritional risk among the older inpatients.

The Nutritional Risk Screening (NRS2002) is recommended for hospitalized patients by the European Society of Parenteral and Enteral Nutrition (ESPEN).<sup>14</sup> It can quickly determine whether a patient needs nutritional support, especially for patients with acute complications.<sup>15, 16</sup> However, the use of NRS2002 excludes patients who cannot be weighed or have problems of communication and the tool is

1  
2  
3 not specifically developed for older patients.  
4  
5

6 The Mini-Nutritional Assessment (MNA) is established for the nutritional  
7 screening and assessment in the geriatrics settings.<sup>1, 17</sup> The ESPEN recommends using  
8 this tool for elderly populations.<sup>18</sup> The MNA was validated against a clinical  
9 evaluations of two geriatrics, including biochemical parameters (nutritional  
10 parameters, C-reactive protein, cholesterol, vitamins), anthropometry (BMI, brachial  
11 circumference, calf circumference, skinfold width of the triceps and subscapular  
12 muscles), dietary components and functional assessment outcomes.<sup>19</sup> It has been  
13 shown to predict outcomes, functional status, mortality, number of hospital visits and  
14 the related healthcare costs.<sup>18, 20-23</sup> In comparison with the NRS2002, the MNA is  
15 more time consuming.<sup>24</sup> Hence, two short forms of the MNA have been developed  
16 and validated, the most recently the revised MNA-SF by Kaiser *et al*<sup>25</sup>, which is  
17 currently the recommended version of the MNA for clinical use. This instrument only  
18 incorporates 6 of the original 18 items and takes approximately 5 minutes to perform.  
19  
20  
21  
22  
23  
24  
25  
26  
27  
28  
29  
30  
31  
32  
33  
34  
35  
36  
37  
38

39 Although a number of studies suggested that serum proteins are associated with  
40 malnutrition, the nature of this association is controversial.<sup>26-28</sup> In addition,  
41 hemoglobin and total lymphocyte count were also proposed as useful indicators of  
42 nutritional status.<sup>27, 29</sup> The aim of our study was to assess the risk of malnutrition  
43 among Chinese older participants with two different tools (NRS2002 and MNA), to  
44 compare them in terms of nutritional biochemical parameters and length of hospital  
45 stay (LOS), and determine the most appropriate tool for these patients. We  
46 hypothesized that both tools were suitable for the study population.  
47  
48  
49  
50  
51  
52  
53  
54  
55  
56  
57  
58  
59  
60

## METHODS

### Study subjects

This study consecutively recruited patients older than 70 years of age who attended internal medicine of geriatrics department of eight large size Tertiary comprehensive hospitals in Hubei Province from December 2014 to May 2016. The eight hospitals are as follows: (1) Tongji Hospital, Tongji Medical College, Huazhong University of Science and Technology, (2) The Central Hospital of Wuhan University, (3) Zhongnan Hospital of Wuhan University, (4) Wuhan No. 6 Hospital, Affiliated Hospital of Jiangnan University, (5) Hubei General Hospital, (6) General Hospital of The Yangtze River Shipping, (7) Wuhan No. 1 Hospital, (8) The First College of Clinical Medical Science, Three Gorges University and Yichang Central People's Hospital.

This cross-sectional study received approval from the institutional Ethics Committee and all subjects signed written informed consent before participation. Inclusion criteria were: (1) age 70 years or older, (2) the patients themselves or their proxies could clearly answer study questions, (3) hospital stay was longer than 24 hours and (4) patients were willing to cooperate with the study. Exclusion criteria included: (1) younger than 70 years old, (2) refusal to participate in the study and (3) patients was unconscious or unable to answer the study questions (Figure 1).

### **Nutritional risk screening 2002 (NRS2002)**

The NRS2002 consists of the following parameters: the severity of acute illness, BMI, patient appetite, accidental weight loss and patient age.<sup>15</sup> The total score ranges from 0 to 7.<sup>16</sup> For investigational purposes, patients were categorized into two groups: a total score  $\geq 3$  indicates under-nourished (at nutritional risk/malnourished) and 0-2 indicates normal nutrition status.<sup>14,30</sup> A nutritional care plan was initiated for patients with a score  $\geq 3$ .<sup>31</sup>

### **Mini-Nutritional Assessment (MNA)**

The MNA is consisted of four parts: anthropometric assessment (0-8 points), general assessment (0-9 points), dietetic habits evaluation (0-9 points) and self-assessment of the nutrition and health status (0-4 points).<sup>32</sup> A score below 17 indicates malnutrition, 17-23.5 indicates malnutrition risk and 24-30 indicates well-nourished.<sup>33</sup> In addition, a nutritional care plan was initiated for patients with a score  $< 17$ .<sup>31</sup>

### **Data Collecting**

Each hospital had 2 researchers trained before the start of the study. The main contents were about how to interpret the questions in the instruments (MNA and NRS2002) and how to perform the measurements. The patients were evaluated with

1  
2  
3 both MNA and NRS2002 by two trained researchers on the first day of admission or  
4  
5  
6 early morning of the next day.  
7

8  
9 Comorbidities and length of hospitalization were obtained from medical records.  
10  
11 Patients were diagnosed by their bedside clinician and superior clinicians. Two trained  
12  
13 researchers of each hospital verified the diagnoses and acquired data. Both body  
14  
15 height and weight were measured at 6-8 am within 24 hours after admission. Patients  
16  
17 were asked to be fasting, only wearing ward clothes and taking off shoes before  
18  
19 measurement. Besides, height was measured with a calibrated scale (corrected to  $\pm 0.5$   
20  
21 cm). The actual body mass was measured with a calibrated scale (corrected to  $\pm 0.2$   
22  
23 kg). Then, the body mass index (BMI) was calculated as weight/height squared  
24  
25  
26  
27  
28  
29  
30  
31  
32  
33  
34  
35  
36  
37  
38  
39  
40  
41  
42  
43  
44  
45  
46  
47  
48  
49  
50  
51  
52  
53  
54  
55  
56  
57  
58  
59  
60

31  
32 Blood samples were also obtained within 24 hours after admission. Nutritional  
33  
34 biochemical parameters including serum hemoglobin (Hb), total lymphocyte count  
35  
36 (TLC), albumin (ALB) and prealbumin (PAB) were examined in the hospital's  
37  
38 clinical chemistry laboratory. Malnutrition was determined when the value of Hb was  
39  
40  $<120$  g/L for males and  $<110$  g/L for females. The cutoff value of ALB was 35 g/L  
41  
42 (normal range 35-55 g/L), PAB was 200mg/L (normal range 200-400 mg/L) and TLC  
43  
44 was  $1.1 \times 10^9$ /L (normal range  $1.1-3.2 \times 10^9$ /L) for both genders for malnutrition.<sup>34</sup>  
45  
46  
47  
48 Moreover, based on previous research<sup>35</sup>, the cutoff value of BMI was set at 20.5  
49  
50  
51  
52  
53  
54  
55  
56  
57  
58  
59  
60

## Patient and public involvement

Patients did not participate in the design and conception of the proposed study. No patients were asked to advice on interpretation or writing up of results. Besides, the results of measurements would be disseminated to participants immediately after the investigation.

## Statistical analysis

The statistical analyses were conducted using SPSS 19.0. Data were presented as mean  $\pm$  standard deviation and ranges in blanket. The chi-square test or student's *t*-test was used according to the data type. One-way analysis of variance was applied for multigroup comparisons and correlation analysis was qualified by the Pearson correlation test. The simple linear regression analysis was used to estimate the relationship between both instruments (MNA/NRS2002) and LOS. Agreement between the two screening tools was achieved by the kappa ( $\kappa$ ) statistic. The results were interpreted as follows:  $<0$ , no agreement; 0-0.19, poor concordance; 0.20-0.39, fair agreement; 0.40-0.59, moderate agreement; 0.60-0.79, substantial agreement; and 0.80-1.00, almost perfect agreement.<sup>29</sup> In addition, the receiver operating characteristic (ROC) curve was applied to compare MNA and NRS2002 separately with nutritional parameters using Medcalc 18.6. The level of significance was set at  $P < 0.05$ .

## RESULTS

Over the study period, a total of 425 individuals from the Department of Geriatrics of eight hospitals in Hubei Province met the eligibility criteria and completed a nutrition assessment within 24 hours of admission (Figure 1). The average age was  $81.2 \pm 5.9$  years (range, 70-98) and 31.1% were females. The average body mass index was  $23.2 \pm 3.7$  kg/m<sup>2</sup> (range, 11.1-34.1). The average length of hospitalization was  $21.9 \pm 13.8$  days (range, 4-133). The most frequent cause of hospitalization was cardiac disease, followed by pulmonary infection, hypertension, cerebrovascular diseases, digestive disease and malignancies. However, the most frequent comorbidities were hypertension, diabetes mellitus, cardiac disease and cerebrovascular disease. Characteristics of study participants are shown in Table 1.

According to the NRS2002, approximately 174 patients (40.9%) were under-nourished and 251 patients (59.1%) were at normal nutritional status. The MNA demonstrated that 99 patients (23.3%) were malnourished, 150 patients (35.3%) were at risk of malnutrition and 176 patients (41.4%) had a normal nutritional status.

Table 2 showed the risk of undernutrition, varying from 23.7% to 58.6%, according to the different methods employed in the current work. The risk of under-nourished participants classified by NRS2002, MNA, BMI, ALB, PAB, TLC were 40.9%, 58.6%, 23.7%, 28.7%, 47.3%, 35.9%, respectively. The risk of malnutrition was higher in men than that in women according to hemoglobin (41.7% vs 25.6%, respectively).

Although both instruments were closely related to each other ( $P < 0.001$ ), they



1  
2  
3 showed substantial differences. Table 3 showed the cross-classification of MNA and  
4  
5  
6 NRS2002 regarding two nutritional categories. The MNA classified more patients as  
7  
8 under-nourished than the NRS2002 (249 vs 174, respectively). Among the 249  
9  
10 patients classified as under-nourished by the MNA, the NRS2002 coincidentally  
11  
12 categorized 159 as malnourished, and 90 as well-nourished. The NRS2002, on the  
13  
14 other hand, classified 174 patients as under-nourished. Within this group of  
15  
16 participants, the MNA classified 159 patients as under-nourished and 15 as  
17  
18 well-nourished. What's more, a participant considered by the MNA to be  
19  
20 well-nourished can be classified as under-nourished using the NRS2002. The  
21  
22 individual categorization of nutritional status presented moderate agreement between  
23  
24 MNA and NRS2002 ( $\kappa=0.521$ ,  $P<0.001$ ).  
25  
26  
27  
28  
29

30 Data of Hb, TLC, ALB and PAB concentrations are listed in Table 2 and  
31  
32 additional Table 1. There existed significant decrease of ALB, PAB, Hb and TLC in  
33  
34 the three groups of MNA scores ( $P<0.001$  and  $P=0.023$ , Figure 2a). Specifically, the  
35  
36 group with the lowest MNA score  $<17$  ( $n=99$ ), indicating a poor nutritional state, had  
37  
38 an average serum albumin of  $33.3\pm 4.8$  g/L (range, 22.8-43.2), an average prealbumin  
39  
40 of  $140.8\pm 81.7$  mg/L (range, 12-339) and an average hemoglobin of  $109.0\pm 20.8$  g/L  
41  
42 (range, 57-150.2) as well as an average lymphocyte count of  $1.5\pm 1.2$   $10^9$ /L (range,  
43  
44 0.3-6.6). In the risk of malnutrition group with an MNA score of 17-23.5 ( $n=150$ ),  
45  
46 average serum albumin was  $37.9\pm 5.6$  g/L (range, 21.6-70), average prealbumin  
47  
48  $192.3\pm 61.8$  mg/L (range, 8-380), average hemoglobin  $120.2\pm 22.0$  g/L (range, 55-181)  
49  
50 and an average lymphocyte count of  $1.3\pm 0.56$   $10^9$ /L (range, 0.2-2.9). The group with  
51  
52  
53  
54  
55  
56  
57  
58  
59  
60

1  
2  
3 MNA $\geq$ 24 (n=180) had an average serum albumin concentration of 39.8 $\pm$ 3.8 g/L  
4  
5 (range, 29.3-54), an average prealbumin of 216.7 $\pm$ 54.4 mg/L (range, 25-337), an  
6  
7 average hemoglobin of 127.6 $\pm$ 15.3 g/L (range, 81-173) and an average lymphocyte  
8  
9 count of 1.5 $\pm$ 0.7 10<sup>9</sup>/L (range, 0.3-4.3; Figure 2a, additional Table 1).  
10  
11

12  
13 Similarly, ALB, PAB and Hb gradually declined with increasing risk of  
14  
15 malnutrition according to NRS2002 results ( $P$ <0.001, figure 2b). In under-nourished  
16  
17 patients (NRS2002: 3-7, n=174), average serum albumin was 35.1 $\pm$ 5.6 g/L (range,  
18  
19 21.6-50.2), average prealbumin 148.5 $\pm$ 79.3 mg/L (range, 17-339) and average  
20  
21 hemoglobin 113.3 $\pm$ 23.6 g/L (range, 55-181). In the normal nutritional state group  
22  
23 (NRS2002: 0-2, n=251), the results were as follows: albumin 39.4 $\pm$ 4.5 g/L (range,  
24  
25 26.4-70), prealbumin 210.2 $\pm$ 56.1 mg/L (range, 8-380) and hemoglobin 125.8 $\pm$ 16.2  
26  
27 g/L (range, 72-173). By contrast, no difference in lymphocyte count was found in both  
28  
29 groups ( $P$ =0.089, Figure 2b, additional Table 1).  
30  
31  
32  
33  
34

35 Table 4 showed the Pearson correlation coefficients of MNA and NRS2002  
36  
37 scores with BMI, serum parameters and LOS. BMI, Hb, ALB and PAB correlated  
38  
39 negatively with malnutrition scores of NRS2002, while showed positive correlation  
40  
41 with the MNA scores ( $P$ <0.001). There existed an inverse correlation between age and  
42  
43 the two tools ( $P$ <0.001). Besides, a significant association between both tools and  
44  
45 LOS was demonstrated ( $P$ <0.05). No correlation was found between TLC and the two  
46  
47 tools.  
48  
49  
50  
51

52 Table 5 showed the simple linear regression of LOS. There was a linear  
53  
54 correlation between the MNA scores and LOS ( $P$ <0.05) and so was the NRS2002  
55  
56  
57  
58  
59  
60

1  
2  
3  
4 scores ( $P<0.01$ ).

5  
6 Figure 3 showed the ROC curve analysis of the sensitivities and specificities of  
7  
8 MNA and NRS2002 for predicting nutritional risk. The comparison between MNA  
9  
10 and NRS2002 in those patients revealed the area under ROC curve (AUC) values for  
11  
12 MNA (0.794, ALB; 0.704, PAB; 0.702, Hb; 0.581, TLC) and NRS2002 (0.761, ALB;  
13  
14 0.616, PAB; 0.677, Hb; 0.586, TLC). Besides, the comparison between the AUC  
15  
16 showed that NRS2002 was not different from MNA for predicting nutritional risk  
17  
18 ( $P=0.191$ , ALB;  $P=0.063$ , PAB;  $P=0.299$ , Hb;  $P=0.866$ , TLC).  
19  
20  
21  
22  
23  
24  
25  
26  
27

## 28 **DISCUSSION**

29  
30 Based on the current study, the nutritional health of older inpatients was assessed  
31  
32 using NRS2002, MNA, BMI, Hb, TLC, ALB and PAB. The results showed that the  
33  
34 overall prevalence of malnutrition risk for the enrolled older patients ranged from  
35  
36 23.7% to 58.6%. The highest prevalence of malnutrition risk was detected by MNA  
37  
38 and the lowest by BMI. These results illustrated the differences in nutritional risk  
39  
40 detected by different screening tools.  
41  
42  
43  
44

45 Biochemical markers possess many advantages in assessing the nutritional status,  
46  
47 such as fast application and low cost. In addition, they can also be incorporated into  
48  
49 the routine of clinical application. As the most abundant plasmatic protein, albumin is  
50  
51 commonly used in the assessment of malnutrition.<sup>36</sup> In several of studies, low serum  
52  
53 ALB correlated with longer hospitalization, medical complications, and increased  
54  
55  
56  
57  
58  
59  
60

1  
2  
3 mortality.<sup>36-38</sup> Nevertheless, its value is still limited by the long half-life (14-20 days),  
4  
5 inflammation, the impairment of hepatic or renal, and possibly aging itself.<sup>27</sup> Due to  
6  
7 the reasons above, the prevalence of malnutrition detected by ALB is lower than  
8  
9 MNA and NRS2002 in our study. Comparatively, a study by Covinsky *et al*<sup>39</sup> showed  
10  
11 ALB is highly sensitive yet low specific in the diagnosis of malnutrition in the  
12  
13 hospitalized older adults.  
14  
15  
16

17  
18 Prealbumin has been regarded as a more sensitive marker than albumin for acute  
19  
20 nutritional changes, as it has a shorter half-life (2-3 days). However, its functions in  
21  
22 nutritional screening and mortality prediction remain controversial.<sup>40-43</sup> In our study,  
23  
24 prealbumin levels showed a great decline with deteriorating nutrition status assessed  
25  
26 by both NRS2002 and MNA. The correlation between serum prealbumin and MNA is  
27  
28 consistent with one study<sup>44</sup>, yet is in contrast with another report.<sup>42</sup> This latter study  
29  
30 had a small sample size (23 older patients), which may account for the discrepancies.  
31  
32 Similar to serum albumin, the usage of prealbumin in predicting malnutrition is  
33  
34 limited due to systemic inflammatory diseases.<sup>41, 45</sup>  
35  
36  
37  
38  
39

40 Hemoglobin has been demonstrated to decrease with progressive malnutrition.<sup>46,</sup>  
41  
42 <sup>47</sup> This relationship, consistent with a recent analysis performed in Northern China<sup>29</sup>,  
43  
44 is found in the proposed study. Total lymphocyte count was assumed to be suitable in  
45  
46 screening test for assessing malnutrition and being an indicator of a poor prognosis.<sup>27</sup>  
47  
48 In agreement with Lei *et al*<sup>48</sup>, we also found a significant correlation between TLC  
49  
50 and MNA. However, no correlation was found between NRS2002 and TLC, which  
51  
52 was consistent with a previous study.<sup>29</sup>  
53  
54  
55  
56  
57  
58  
59  
60

1  
2  
3  
4 The prevalence of malnutrition diagnosed by BMI was far below that detected by  
5  
6 MNA. Consistent with findings from another study<sup>49</sup>, this study suggested that  
7  
8 malnutrition was also under diagnosed when using BMI as the sole criteria. The  
9  
10 reason is most possibly related to water-sodium retention in patients, leading to an  
11  
12 overestimation of their true weight.<sup>50</sup> In spite of this, low BMI was significantly  
13  
14 associated with mortality.<sup>51</sup>  
15  
16

17  
18 Our study revealed that NRS2002 and MNA, in moderate agreement with each  
19  
20 other, were consistently associated with age, BMI, Hb, ALB and PAB. Nevertheless,  
21  
22 the MNA identified more patients with or at risk of malnutrition than the NRS2002  
23  
24 did. The lower percentage of malnutrition classified by NRS2002 may be explained in  
25  
26 several ways. First, the NRS2002 mainly consider the influence of acute diseases on  
27  
28 nutritional status, while the MNA take chronic long-term condition into consideration,  
29  
30 such as psychological factors and the BMI. Psychological factors may play a large  
31  
32 role in the nutritional status of older inpatients. In addition, we categorized  
33  
34 undernutrition as  $NRS2002 \geq 3$ , while patients with a score of 1-2 indicates low risk of  
35  
36 malnutrition.<sup>52</sup> This may have underestimated the percentage of malnutrition.  
37  
38 Moreover, our study subjects were internal medical patients, among which the  
39  
40 proportion of overweight and obesity was high. The NRS2002 takes  $BMI < 18.5$   
41  
42  $kg/m^2$  as one of the criteria, leading to a lower proportion of malnutrition with  
43  
44 NRS2002 than that of MNA. Our results agree with findings from Raslan *et al*,<sup>5</sup> yet  
45  
46 differ from the study conducted by Drescher *et al*.<sup>52</sup> The latter study was conducted in  
47  
48 older patients with acute disease, which may explain the difference.  
49  
50  
51  
52  
53  
54  
55  
56  
57  
58  
59  
60

1  
2  
3  
4 Norman *et al* suggested that there exists a close relationship between the degree  
5  
6 of malnutrition and LOS.<sup>53</sup> In the present study, we found the linear relation between  
7  
8 both instruments (MNA and NRS2002) and LOS. Our findings corroborated those of  
9  
10 the study conducted by Bauer *et al*,<sup>54</sup> showing longer hospital stay was associated  
11  
12 with malnutrition assessed by the MNA. Comparison of the MNA and NRS 2002 and  
13  
14 their ability to predict nutritional risk according to different standards showed that  
15  
16 MNA and NRS 2002 were the both suitable screening tools, in terms of the ROC  
17  
18 curve area. Therefore, we conclude, that in Chinese geriatric inpatients, the NRS2002  
19  
20 and MNA might reflect malnutrition or the studied biochemical parameters, as well as  
21  
22 predict the length of hospitalization. However, the MNA was available for identifying  
23  
24 most of the patients with or at risk of malnutrition.  
25  
26  
27  
28  
29  
30  
31  
32  
33  
34

### 35 **Limitations**

36  
37 Our study still has some limitations. First, a consensus statement with diagnostic  
38  
39 criteria for malnutrition was proposed in 2015<sup>55</sup> after our study initiated and thus it  
40  
41 was not utilized in our study. Second, BMI and age were parts of the screening tools,  
42  
43 therefore already correlated with the MNA and NRS-2002 assessment. Besides, in  
44  
45 addition to nutritional status, LOS could also be influenced by age, financial situation,  
46  
47 comorbidities and so on, which may explain the low  $R^2$  between both instruments and  
48  
49 LOS. Finally, regarding the cross-classification of MNA, more patients will be  
50  
51 categorized as at risk since the two groups malnourished and at risk are combined,  
52  
53 which may contribute to the low Kappa value between the two instruments.  
54  
55  
56  
57  
58  
59  
60

## CONCLUSION

To conclude, the results of the present study show a high prevalence of malnutrition risk in Chinese geriatric hospitalized patients. Although the nutritional risk varied depending on the applied method, both NRS2002 and MNA correlated with each other and with age, BMI and laboratory parameters. Besides, both tools were proved to be a good predictor of the length of hospitalization. Moreover, the NRS2002 was not different from MNA for predicting nutritional risk according to the AUC. Therefore, this study suggested NRS2002 and MNA both were suitable to screen malnutrition risk among Chinese geriatric inpatients. We recommend using one of them in admission.

**Acknowledgements** We are appreciated for the participating volunteer patients, the local research ethics committee and the individual researchers, clinicians and nurses for their participation in the data collection.

**Contributors** JPM, XQQ and HLZ are main contributors to the design of the present study. JPM and XQQ contributed to the study conception and design. HLZ and CTZ, took part in the discussion and modification of the study design. HZ, MY, LYS, QHG, GYZ, QJM, YXW, and SGL contributed to the study conception. XQQ, HZ, MY, LYS, QHG, GYZ, QJM, YXW and SGL were involved in the acquisition of data. JPM and

1  
2  
3 XQQ made contributions to the drafting of the manuscript. HLZ and CTZ were  
4  
5  
6 involved in the critical revision. All the authors were involved in the analysis and  
7  
8 interpretation of the data and gave their final approval.  
9

10  
11  
12  
13 **Funding** This project was funded by the National Natural Science Foundation of  
14  
15  
16 China (Grant No. 81400255).  
17

18  
19  
20  
21  
22  
23 **Competing interests** None declared.  
24

25  
26  
27  
28  
29  
30 **Ethics approval** Ethics Review Board of Tongji Hospital, Tongji Medical College,  
31  
32  
33 Huazhong University of Science and Technology (TJ-C20141112).  
34

35  
36  
37  
38 **Provenance and peer review** Not commissioned; externally peer reviewed.  
39

40  
41  
42  
43  
44  
45 **Data sharing statement** No additional data are available.  
46

47  
48  
49  
50  
51 **Open Access** This is an Open Access article distributed in accordance with the  
52  
53  
54 Creative Commons Attribution Non Commercial (CC BY-NC 4.0) license, which  
55  
56 permits others to distribute, remix, adapt, build upon this work non-commercially, and  
57



1  
2  
3 license their derivative works on different terms, provided the original work is  
4  
5 properly cited and the use is non-commercial. See:  
6  
7  
8 <http://creativecommons.org/licenses/by-nc/4.0/>  
9  
10  
11  
12  
13  
14  
15  
16  
17  
18  
19  
20  
21  
22  
23  
24  
25  
26  
27  
28  
29  
30  
31  
32  
33  
34  
35  
36  
37  
38  
39  
40  
41  
42  
43  
44  
45  
46  
47  
48  
49  
50  
51  
52  
53  
54  
55  
56  
57  
58  
59  
60

For peer review only

1  
2  
3 **Figure legend**  
4

5 **Figure 1** Flow diagram of participant inclusion and exclusion.  
6  
7

8  
9 **Figure 2** MNA (a) and NRS2002 (b) referring to serum albumin, prealbumin,  
10 hemoglobin and blood lymphocytes count respectively.  
11  
12

13  
14 **Figure 3** Receiver operating characteristics of sensitivity and specificity of predicted  
15 probabilities for nutritional risk incorporating the MNA score or the NRS2002 score.  
16  
17  
18  
19  
20  
21  
22  
23  
24  
25  
26  
27  
28  
29  
30  
31  
32  
33  
34  
35  
36  
37  
38  
39  
40  
41  
42  
43  
44  
45  
46  
47  
48  
49  
50  
51  
52  
53  
54  
55  
56  
57  
58  
59  
60

**REFERENCES**

1. Guigoz Y. The Mini Nutritional Assessment (MNA) review of the literature--What does it tell us? *J Nutr Health Aging*. 2006;10:466-85; discussion 485-7.
2. Chang SF. Frailty Is a Major Related Factor for at Risk of Malnutrition in Community-Dwelling Older Adults. *J Nurs Scholarsh*. 2017;49:63-72.
3. Lumale S. [Nutritional management of elderly people, everyone's concern]. *Rev Infirm*. 2017;66:25-26.
4. Lesourd B. Nutritional factors and immunological ageing. *Proc Nutr Soc*. 2006;65:319-25.
5. Raslan M, Gonzalez MC, Dias MC, *et al*. Comparison of nutritional risk screening tools for predicting clinical outcomes in hospitalized patients. *Nutrition*. 2010;26:721-6.
6. Ehwerhemuepha L, Bendig D, Steele C, *et al*. The Effect of Malnutrition on the Risk of Unplanned 7-Day Readmission in Pediatrics. *Hosp Pediatr*. 2018.
7. Ahmed N, Choe Y, Mustad VA, *et al*. Impact of malnutrition on survival and healthcare utilization in Medicare beneficiaries with diabetes: a retrospective cohort analysis. *BMJ Open Diabetes Res Care*. 2018;6:e000471.
8. Sharma Y, Miller M, Kaambwa B, *et al*. Malnutrition and its association with readmission and death within 7 days and 8-180 days postdischarge in older patients: a prospective observational study. *BMJ Open*. 2017;7:e018443.
9. Khalatbari-Soltani S, Marques-Vidal P. The economic cost of hospital malnutrition in Europe; a narrative review. *Clin Nutr ESPEN*. 2015;10:e89-e94.
10. Bouillanne O, Curis E, Hamon-Vilcot B, *et al*. Impact of protein pulse feeding on lean mass in malnourished and at-risk hospitalized elderly patients: a randomized controlled trial. *Clin Nutr*. 2013;32:186-92.
11. Ballesteros-Pomar MD, Martinez Llinas D, Goates S, *et al*. Cost-Effectiveness of a Specialized Oral Nutritional Supplementation for Malnourished Older Adult Patients in Spain. *Nutrients*. 2018;10.
12. Racic M, Ivkovic N, Kusmuk S. [Screening of Nutritional Status among Elderly People at Family Medicine]. *Acta Med Croatica*. 2015;69:347-56.
13. Abd Aziz NAS, Teng N, Abdul Hamid MR, *et al*. Assessing the nutritional status of hospitalized elderly. *Clin Interv Aging*. 2017;12:1615-1625.
14. Elia M, Stratton R. On the ESPEN guidelines for nutritional screening 2002. *Clin Nutr*. 2004;23:131-2.
15. Kondrup J, Rasmussen HH, Hamberg O, *et al*. Nutritional risk screening (NRS 2002): a new method based on an analysis of controlled clinical trials. *Clin Nutr*. 2003;22:321-36.
16. Kondrup J, Allison SP, Elia M, *et al*. ESPEN guidelines for nutrition screening 2002. *Clin Nutr*. 2003;22:415-21.
17. Guigoz Y, Vellas B, Garry PJ. Assessing the nutritional status of the elderly: The Mini Nutritional Assessment as part of the geriatric evaluation. *Nutr Rev*. 1996;54:S59-65.
18. Bleda MJ, Bolibar I, Pares R, *et al*. Reliability of the mini nutritional assessment

- (MNA) in institutionalized elderly people. *J Nutr Health Aging*. 2002;6:134-7.
19. Bauer JM, Kaiser MJ, Anthony P, *et al*. The Mini Nutritional Assessment--its history, today's practice, and future perspectives. *Nutr Clin Pract*. 2008;23:388-96.
  20. Soderstrom L, Rosenblad A, Adolfsson ET, *et al*. Nutritional status predicts preterm death in older people: a prospective cohort study. *Clin Nutr*. 2014;33:354-9.
  21. Dent E, Visvanathan R, Piantadosi C, *et al*. Use of the Mini Nutritional Assessment to detect frailty in hospitalised older people. *J Nutr Health Aging*. 2012;16:764-7.
  22. Cabre M, Ferreiro C, Arus M, *et al*. Evaluation of CONUT for Clinical Malnutrition Detection and Short-Term Prognostic Assessment in Hospitalized Elderly People. *J Nutr Health Aging*. 2015;19:729-33.
  23. Chavarro-Carvajal D, Reyes-Ortiz C, Samper-Ternent R, *et al*. Nutritional assessment and factors associated to malnutrition in older adults: a cross-sectional study in Bogota, Colombia. *J Aging Health*. 2015;27:304-19.
  24. Kyle UG, Kossovsky MP, Karsegard VL, *et al*. Comparison of tools for nutritional assessment and screening at hospital admission: a population study. *Clin Nutr*. 2006;25:409-17.
  25. Kaiser MJ, Bauer JM, Ramsch C, *et al*. Validation of the Mini Nutritional Assessment short-form (MNA-SF): a practical tool for identification of nutritional status. *J Nutr Health Aging*. 2009;13:782-8.
  26. Sergi G, Coin A, Enzi G, *et al*. Role of visceral proteins in detecting malnutrition in the elderly. *Eur J Clin Nutr*. 2006;60:203-9.
  27. Omran ML, Morley JE. Assessment of protein energy malnutrition in older persons, Part II: Laboratory evaluation. *Nutrition*. 2000;16:131-40.
  28. Omran ML, Morley JE. Assessment of protein energy malnutrition in older persons, part I: History, examination, body composition, and screening tools. *Nutrition*. 2000;16:50-63.
  29. Zhou J, Wang M, Wang H, *et al*. Comparison of two nutrition assessment tools in surgical elderly inpatients in Northern China. *Nutr J*. 2015;14:68.
  30. Thoresen L, Frykholm G, Lydersen S, *et al*. Nutritional status, cachexia and survival in patients with advanced colorectal carcinoma. Different assessment criteria for nutritional status provide unequal results. *Clin Nutr*. 2013;32:65-72.
  31. Wei J, Chen W, Zhu M, *et al*. Guidelines for parenteral and enteral nutrition support in geriatric patients in China. *Asia Pac J Clin Nutr*. 2015;24:336-46.
  32. Jacobsen EL, Brovold T, Bergland A, *et al*. Prevalence of factors associated with malnutrition among acute geriatric patients in Norway: a cross-sectional study. *BMJ Open*. 2016;6:e011512.
  33. Guigoz Y, Vellas B. The Mini Nutritional Assessment (MNA) for grading the nutritional state of elderly patients: presentation of the MNA, history and validation. *Nestle Nutr Workshop Ser Clin Perform Programme*. 1999;1:3-11; discussion 11-2.
  34. Blackburn GL, Bistrian BR, Maini BS, *et al*. Nutritional and metabolic

- assessment of the hospitalized patient. *JPEN J Parenter Enteral Nutr.* 1977;1:11-22.
35. Zhou J, Wang M, Wang H, *et al.* Comparison of two nutrition assessment tools in surgical elderly inpatients in Northern China. *Nutr J.* 2015;14:68.
  36. Cabrerizo S, Cuadras D, Gomez-Busto F, *et al.* Serum albumin and health in older people: Review and meta analysis. *Maturitas.* 2015;81:17-27.
  37. O'Daly BJ, Walsh JC, Quinlan JF, *et al.* Serum albumin and total lymphocyte count as predictors of outcome in hip fractures. *Clin Nutr.* 2010;29:89-93.
  38. Chiu PF, Tsai CC, Wu CL, *et al.* Trajectories of Serum Albumin Predict Survival of Peritoneal Dialysis Patients: A 15-year Follow-Up Study. *Medicine (Baltimore).* 2016;95:e3202.
  39. Covinsky KE, Covinsky MH, Palmer RM, *et al.* Serum albumin concentration and clinical assessments of nutritional status in hospitalized older people: different sides of different coins? *Journal of the American Geriatrics Society.* 2002;50:631-7.
  40. Carriere I, Dupuy AM, Lacroux A, *et al.* Biomarkers of inflammation and malnutrition associated with early death in healthy elderly people. *Journal of the American Geriatrics Society.* 2008;56:840-6.
  41. Devoto G, Gallo F, Marchello C, *et al.* Prealbumin serum concentrations as a useful tool in the assessment of malnutrition in hospitalized patients. *Clinical chemistry.* 2006;52:2281-5.
  42. Langkamp-Henken B, Hudgens J, Stechmiller JK, *et al.* Mini nutritional assessment and screening scores are associated with nutritional indicators in elderly people with pressure ulcers. *J Am Diet Assoc.* 2005;105:1590-6.
  43. Kanda M, Mizuno A, Tanaka C, *et al.* Nutritional predictors for postoperative short-term and long-term outcomes of patients with gastric cancer. *Medicine (Baltimore).* 2016;95:e3781.
  44. Vellas B, Guigoz Y, Baumgartner M, *et al.* Relationships between nutritional markers and the mini-nutritional assessment in 155 older persons. *Journal of the American Geriatrics Society.* 2000;48:1300-9.
  45. Lopez-Hellin J, Baena-Fustegueras JA, Schwartz-Riera S, *et al.* Usefulness of short-lived proteins as nutritional indicators surgical patients. *Clin Nutr.* 2002;21:119-25.
  46. Wham CA, Teh RO, Robinson M, *et al.* What is associated with nutrition risk in very old age? *J Nutr Health Aging.* 2011;15:247-51.
  47. Weng CH, Hsu CW, Hu CC, *et al.* Association Between Hemodiafiltration and Hypoalbuminemia in Middle-Age Hemodialysis Patients. *Medicine (Baltimore).* 2016;95:e3334.
  48. Lei Z, Qingyi D, Feng G, *et al.* Clinical study of mini-nutritional assessment for older Chinese inpatients. *J Nutr Health Aging.* 2009;13:871-5.
  49. Antaki F, French MM, Moonka DK, *et al.* Bioelectrical impedance analysis for the evaluation of hepatic fibrosis in patients with chronic hepatitis C infection. *Dig Dis Sci.* 2008;53:1957-60.
  50. Roongpisuthipong C, Sobhonslidsuk A, Nantiruj K, *et al.* Nutritional assessment

- 1  
2  
3 in various stages of liver cirrhosis. *Nutrition*. 2001;17:761-5.
- 4 51. Akinyemiju T, Meng Q, Vin-Raviv N. Association between body mass index and  
5 in-hospital outcomes: Analysis of the nationwide inpatient database. *Medicine*  
6 (*Baltimore*). 2016;95:e4189.
- 7  
8 52. Drescher T, Singler K, Ulrich A, *et al*. Comparison of two malnutrition risk  
9 screening methods (MNA and NRS 2002) and their association with markers of  
10 protein malnutrition in geriatric hospitalized patients. *Eur J Clin Nutr*.  
11 2010;64:887-93.
- 12  
13 53. Norman K, Pichard C, Lochs H, *et al*. Prognostic impact of disease-related  
14 malnutrition. *Clin Nutr*. 2008;27:5-15.
- 15 54. Bauer JM, Vogl T, Wicklein S, *et al*. Comparison of the Mini Nutritional  
16 Assessment, Subjective Global Assessment, and Nutritional Risk Screening  
17 (NRS 2002) for nutritional screening and assessment in geriatric hospital patients.  
18 *Z Gerontol Geriatr*. 2005;38:322-7.
- 19  
20 55. Cederholm T, Bosaeus I, Barazzoni R, *et al*. Diagnostic criteria for malnutrition -  
21 An ESPEN Consensus Statement. *Clin Nutr*. 2015;34:335-40.
- 22  
23  
24  
25  
26  
27  
28  
29  
30  
31  
32  
33  
34  
35  
36  
37  
38  
39  
40  
41  
42  
43  
44  
45  
46  
47  
48  
49  
50  
51  
52  
53  
54  
55  
56  
57  
58  
59  
60

**Table 1** Characteristic of study participants

| Variable                                        | All subjects (n=425)  |
|-------------------------------------------------|-----------------------|
| Age (year)                                      | 81.2±5.9 (70-98)      |
| Gender                                          |                       |
| Male                                            | 68.9% (293)           |
| Female                                          | 31.1% (132)           |
| Height (m)                                      | 1.6±0.1 (1.4-1.8)     |
| Weight (kg)                                     | 62.9±11.5 (28.4-92.0) |
| Body mass index (kg/m <sup>2</sup> )            | 23.2±3.7 (11.1-34.1)  |
| Length of hospital stay (day)                   | 21.9±13.8 (4-133)     |
| Primary cause of admission to hospital          |                       |
| Cardiac disease                                 | 160 (37.6%)           |
| Pulmonary infection                             | 84 (19.8%)            |
| Hypertension                                    | 76 (17.9%)            |
| Cerebrovascular disease                         | 45 (10.6%)            |
| Digestive disease                               | 25 (5.9%)             |
| Malignancy                                      | 19 (4.5%)             |
| Others                                          | 16 (3.8%)             |
| Comorbidities                                   |                       |
| Hypertension                                    | 210 (49.4%)           |
| Diabetes mellitus                               | 101 (23.8%)           |
| Cardiac disease (including atrial fibrillation) | 94 (22.1%)            |
| Cerebrovascular disease                         | 30 (7.1%)             |

Values are mean ± standard deviation (with ranges in brackets) or % (numbers), respectively.

**Table 2** Nutritional status (% , n) of 425 patients classified by NRS2002, MNA, BMI and serum parameters

|             | <b>Under-nourished</b> | <b>Well-nourished</b> |
|-------------|------------------------|-----------------------|
| NRS2002     | 40.9% (174)            | 59.1% (251)           |
| MNA         | 58.6% (249)            | 41.4% (176)           |
| BMI         | 23.7% (93)             | 76.3% (300)           |
| ALB         | 28.7% (122)            | 71.3% (303)           |
| PAB         | 47.3% (70)             | 52.7% (78)            |
| Hb (male)   | 41.7% (121)            | 58.3% (169)           |
| Hb (female) | 25.6% (33)             | 74.4% (96)            |
| TLC         | 35.9% (149)            | 64.1% (266)           |

ALB = albumin, BMI = Body mass index, Hb = hemoglobin, MNA = Mini-Nutritional Assessment, NRS2002 = Nutritional Risk Screening 2002, PAB = prealbumin, TLC = total lymphocyte count. Under-nourished (malnourished + at risk of malnutrition).



**Table 3** Cross-classification

| MNA             | NRS2002         |                | Total |
|-----------------|-----------------|----------------|-------|
|                 | Under-nourished | Well-nourished |       |
| Under-nourished | 159             | 90             | 249   |
| Well-nourished  | 15              | 161            | 176   |
| Total           | 174             | 251            | 425   |
| Kappa           | 0.521           |                |       |
| <i>P</i>        | <0.001          |                |       |

Number of patients classified into two categories according to MNA and NRS, respectively. MNA = Mini-Nutritional assessment, NRS2002 = Nutritional risk score 2002. Under-nourished: malnutrition + at risk of malnutrition.

**Table 4** Pearson correlation coefficients of MNA and NRS2002 scores with BMI, serum parameters and LOS

|         | MNA      |          | NRS2002  |          |
|---------|----------|----------|----------|----------|
|         | <i>r</i> | <i>p</i> | <i>r</i> | <i>p</i> |
| Age     | -0.239   | <0.001   | 0.238    | <0.001   |
| BMI     | 0.578    | <0.001   | -0.347   | <0.001   |
| Hb      | 0.387    | <0.001   | -0.321   | <0.001   |
| TLC     | -0.002   | 0.966    | 0.011    | 0.819    |
| ALB     | 0.501    | <0.001   | -0.383   | <0.001   |
| PAB     | 0.481    | <0.001   | -0.332   | <0.001   |
| LOS     | -0.109   | 0.048    | 0.178    | 0.001    |
| NRS2002 | -0.640   | <0.001   | —        | —        |

ALB = albumin, BMI = body mass index, Hb = hemoglobin, LOS = length of hospital stay, MNA = Mini-Nutritional Assessment, NRS2002 = Nutritional Risk Screening 2002, PAB = prealbumin, TLC = total lymphocyte count.

**Table 5** The simple linear regression analysis of LOS

|         | B      | SE    | $\beta$ | t      | P     | 95%CI         | R <sup>2</sup> | F      |
|---------|--------|-------|---------|--------|-------|---------------|----------------|--------|
| MNA     | -0.261 | 0.131 | -0.109  | -1.987 | <0.05 | -0.519,-0.003 | 0.012          | 3.949  |
| NRS2002 | 1.891  | 0.575 | 0.178   | 3.291  | <0.01 | 0.761,3.022   | 0.032          | 10.834 |

LOS = length of hospital stay, CI = confidence interval, MNA = Mini-Nutritional Assessment, NRS2002=Nutritional Risk Screening 2002.

For peer review only

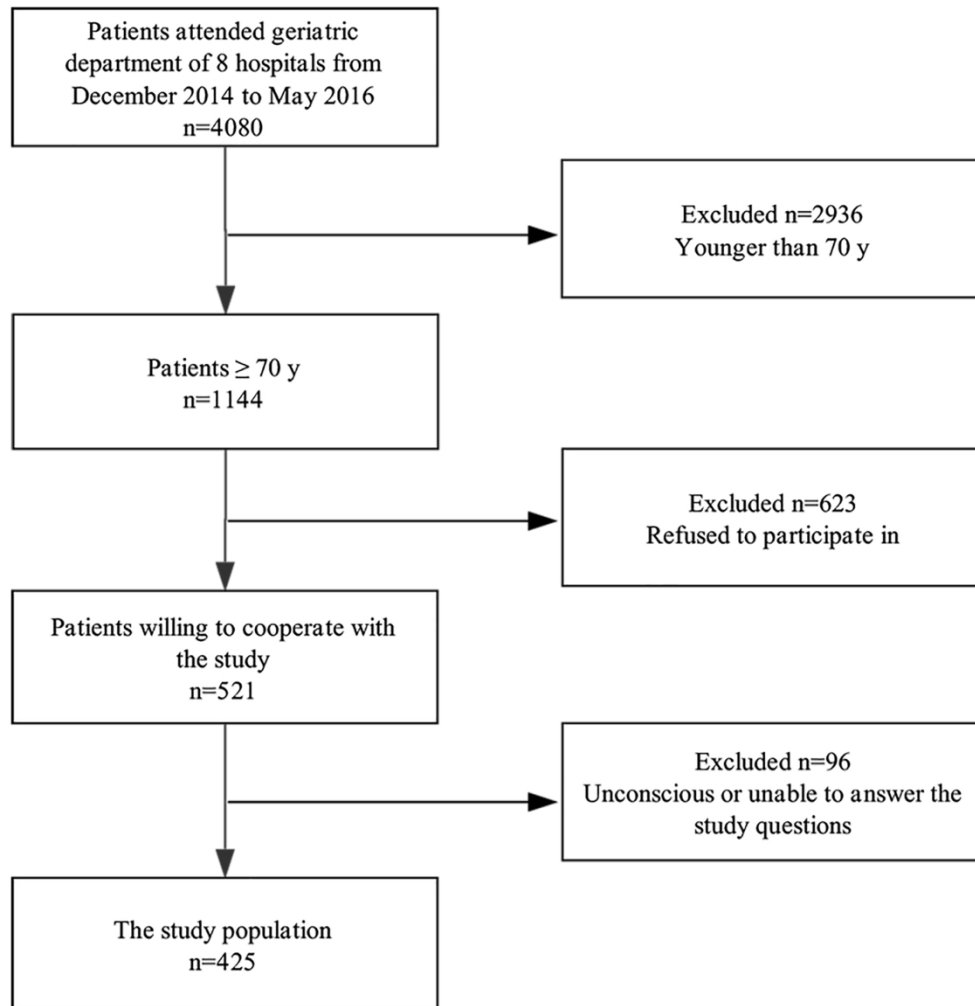

Figure 1 Flow diagram of participant inclusion and exclusion.

167x172mm (300 x 300 DPI)

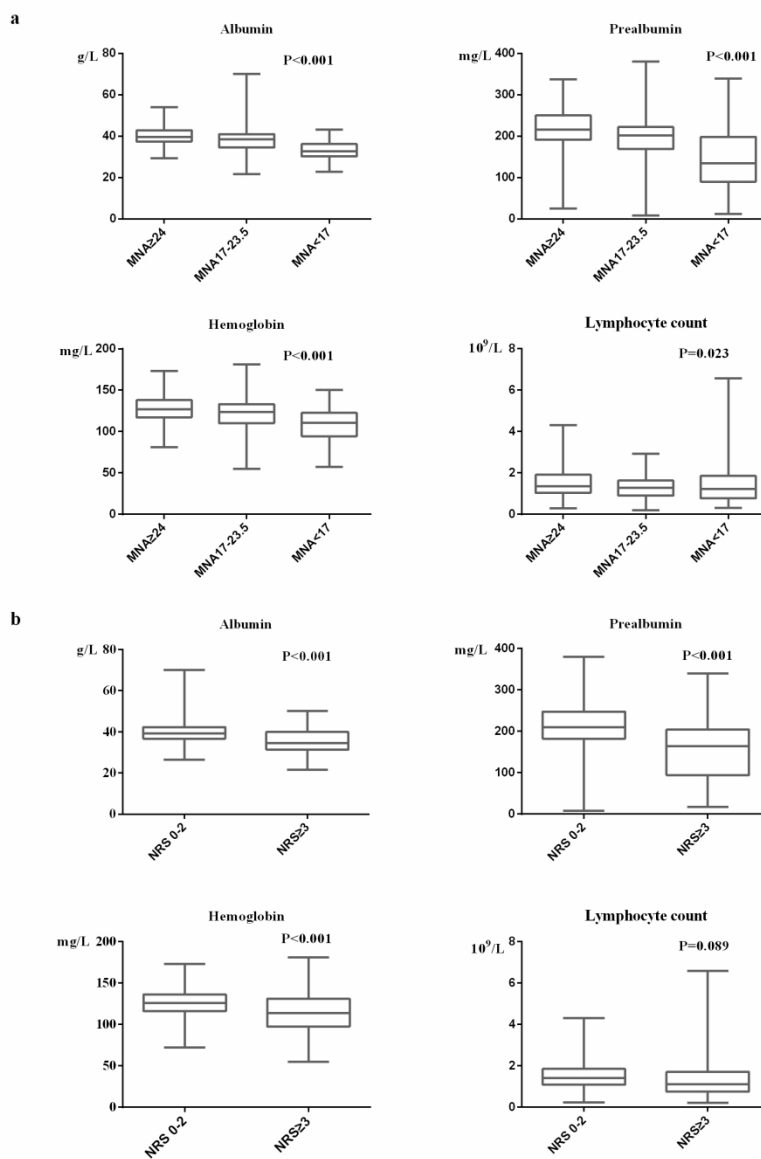

Figure 2 MNA (a) and NRS2002 (b) referring to serum albumin, prealbumin, hemoglobin and blood lymphocytes count respectively.

175x262mm (300 x 300 DPI)

1  
2  
3  
4  
5  
6  
7  
8  
9  
10  
11  
12  
13  
14  
15  
16  
17  
18  
19  
20  
21  
22  
23  
24  
25  
26  
27  
28  
29  
30  
31  
32  
33  
34  
35  
36  
37  
38  
39  
40  
41  
42  
43  
44  
45  
46  
47  
48  
49  
50  
51  
52  
53  
54  
55  
56  
57  
58  
59  
60

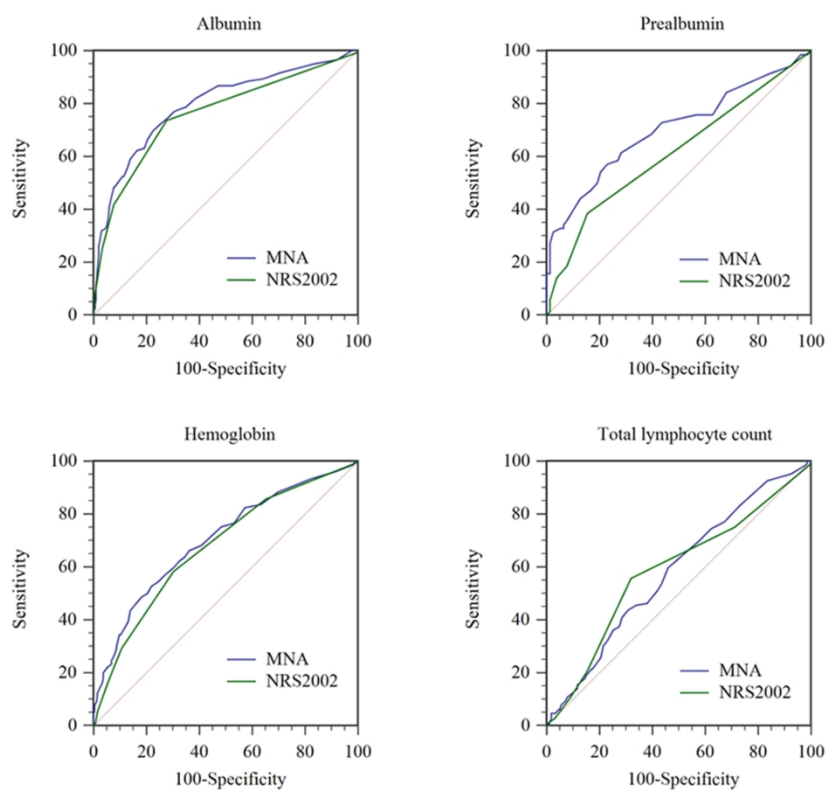

Figure 3 Receiver operating characteristics of sensitivity and specificity of predicted probabilities for nutritional risk incorporating the MNA score or the NRS2002 score.

170x139mm (300 x 300 DPI)

**Additional Table 1** Nutritional parameters of study participants classified by MNA and NRS2002

|                | ALB (g/L)               | PAB (mg/L)             | Hb (g/L)                 | TLC ( $10^9/L$ )     |
|----------------|-------------------------|------------------------|--------------------------|----------------------|
| <b>MNA</b>     |                         |                        |                          |                      |
| <17            | 33.3±4.8<br>(22.8-43.2) | 140.8±81.7<br>(12-339) | 109.0±20.8<br>(57-150.2) | 1.5±1.2<br>(0.3-6.6) |
| 17-23.5        | 37.9±5.6<br>(21.6-70)   | 192.3±61.8<br>(8-380)  | 120.2±22.0<br>(55-181)   | 1.3±0.6<br>(0.2-2.9) |
| ≥24            | 39.8±3.8<br>(29.3-54)   | 216.7±54.4<br>(25-337) | 127.6±15.3<br>(81-173)   | 1.5±0.7<br>(0.3-4.3) |
| <b>NRS2002</b> |                         |                        |                          |                      |
| ≥3             | 35.1±5.6<br>(21.6-50.2) | 148.5±79.3<br>(17-339) | 113.3±23.6<br>(55-181)   | 1.4±1.0<br>(0.2-6.6) |
| 0-2            | 39.4±4.5<br>(26.4-70)   | 210.2±56.1<br>(8-380)  | 125.8±16.2<br>(72-173)   | 1.5±0.6<br>(0.2-4.3) |

ALB = albumin, PAB = prealbumin, Hb = hemoglobin, TLC = total lymphocyte count, MNA = Mini-Nutritional Assessment, NRS2002=Nutritional Risk Screening 2002.

Values are mean ± standard deviation (with ranges in brackets)

**STROBE Statement**

## Checklist of items that should be included in reports of observational studies

| Section/Topic             | Item No | Recommendation                                                                                                                                                                             | Reported on Page No |
|---------------------------|---------|--------------------------------------------------------------------------------------------------------------------------------------------------------------------------------------------|---------------------|
| <b>Title and abstract</b> | 1       | (a) Indicate the study's design with a commonly used term in the title or the abstract                                                                                                     | 1-3                 |
|                           |         | (b) Provide in the abstract an informative and balanced summary of what was done and what was found                                                                                        | 2-3                 |
| <b>Introduction</b>       |         |                                                                                                                                                                                            |                     |
| Background/rationale      | 2       | Explain the scientific background and rationale for the investigation being reported                                                                                                       | 4-5                 |
| Objectives                | 3       | State specific objectives, including any prespecified hypotheses                                                                                                                           | 5                   |
| <b>Methods</b>            |         |                                                                                                                                                                                            |                     |
| Study design              | 4       | Present key elements of study design early in the paper                                                                                                                                    | 6                   |
| Setting                   | 5       | Describe the setting, locations, and relevant dates, including periods of recruitment, exposure, follow-up, and data collection                                                            | 6-8                 |
| Participants              | 6       | (a) <i>Cohort study</i> —Give the eligibility criteria, and the sources and methods of selection of participants. Describe methods of follow-up                                            | 6                   |
|                           |         | <i>Case-control study</i> —Give the eligibility criteria, and the sources and methods of case ascertainment and control selection. Give the rationale for the choice of cases and controls |                     |
|                           |         | <i>Cross-sectional study</i> —Give the eligibility criteria, and the sources and methods of selection of participants                                                                      |                     |
| Variables                 | 7       | (b) <i>Cohort study</i> —For matched studies, give matching criteria and number of exposed and unexposed                                                                                   | NA                  |
|                           |         | <i>Case-control study</i> —For matched studies, give matching criteria and the number of controls per case                                                                                 |                     |
|                           |         | Clearly define all outcomes, exposures, predictors, potential confounders, and effect modifiers. Give diagnostic criteria, if applicable                                                   | 7-8                 |
| Data sources/measurement  | 8*      | For each variable of interest, give sources of data and details of methods of assessment (measurement). Describe comparability of assessment methods if there is more than one group       | 8                   |
| Bias                      | 9       | Describe any efforts to address potential sources of bias                                                                                                                                  | 7                   |
| Study size                | 10      | Explain how the study size was arrived at                                                                                                                                                  | 6                   |
| Quantitative variables    | 11      | Explain how quantitative variables were handled in the analyses. If applicable, describe which groupings were chosen and why                                                               | 9                   |
| Statistical methods       | 12      | (a) Describe all statistical methods, including those used to control for confounding                                                                                                      | 9                   |
|                           |         | (b) Describe any methods used to examine subgroups and interactions                                                                                                                        | 9                   |
|                           |         | (c) Explain how missing data were addressed                                                                                                                                                | NA                  |
|                           |         | (d) <i>Cohort study</i> —If applicable, explain how loss to follow-up was addressed                                                                                                        | NA                  |
|                           |         | <i>Case-control study</i> —If applicable, explain how matching of cases and controls was addressed                                                                                         |                     |
|                           |         | <i>Cross-sectional study</i> —If applicable, describe analytical methods taking account of sampling strategy                                                                               |                     |
|                           |         | (e) Describe any sensitivity analyses                                                                                                                                                      | 9                   |



| Section/Topic            | Item No | Recommendation                                                                                                                                                                                               | Reported on Page No |
|--------------------------|---------|--------------------------------------------------------------------------------------------------------------------------------------------------------------------------------------------------------------|---------------------|
| <b>Results</b>           |         |                                                                                                                                                                                                              |                     |
| Participants             | 13*     | (a) Report numbers of individuals at each stage of study—eg numbers potentially eligible, examined for eligibility, confirmed eligible, included in the study, completing follow-up, and analysed            | 9                   |
|                          |         | (b) Give reasons for non-participation at each stage                                                                                                                                                         | Figure 1            |
|                          |         | (c) Consider use of a flow diagram                                                                                                                                                                           | Figure 1            |
| Descriptive data         | 14*     | (a) Give characteristics of study participants (eg demographic, clinical, social) and information on exposures and potential confounders                                                                     | 9                   |
|                          |         | (b) Indicate number of participants with missing data for each variable of interest                                                                                                                          | NA                  |
|                          |         | (c) <i>Cohort study</i> —Summarise follow-up time (eg, average and total amount)                                                                                                                             | NA                  |
| Outcome data             | 15*     | <i>Cohort study</i> —Report numbers of outcome events or summary measures over time                                                                                                                          | NA                  |
|                          |         | <i>Case-control study</i> —Report numbers in each exposure category, or summary measures of exposure                                                                                                         | NA                  |
|                          |         | <i>Cross-sectional study</i> —Report numbers of outcome events or summary measures                                                                                                                           | 9                   |
| Main results             | 16      | (a) Give unadjusted estimates and, if applicable, confounder-adjusted estimates and their precision (eg, 95% confidence interval). Make clear which confounders were adjusted for and why they were included | NA                  |
|                          |         | (b) Report category boundaries when continuous variables were categorized                                                                                                                                    | 10-12               |
|                          |         | (c) If relevant, consider translating estimates of relative risk into absolute risk for a meaningful time period                                                                                             | NA                  |
| Other analyses           | 17      | Report other analyses done—eg analyses of subgroups and interactions, and sensitivity analyses                                                                                                               | 10-12               |
| <b>Discussion</b>        |         |                                                                                                                                                                                                              |                     |
| Key results              | 18      | Summarise key results with reference to study objectives                                                                                                                                                     | 16                  |
| Limitations              | 19      | Discuss limitations of the study, taking into account sources of potential bias or imprecision. Discuss both direction and magnitude of any potential bias                                                   | 16                  |
| Interpretation           | 20      | Give a cautious overall interpretation of results considering objectives, limitations, multiplicity of analyses, results from similar studies, and other relevant evidence                                   | 13-16               |
| Generalisability         | 21      | Discuss the generalisability (external validity) of the study results                                                                                                                                        | 16                  |
| <b>Other Information</b> |         |                                                                                                                                                                                                              |                     |
| Funding                  | 22      | Give the source of funding and the role of the funders for the present study and, if applicable, for the original study on which the present article is based                                                | 17                  |

\*Give information separately for cases and controls in case-control studies and, if applicable, for exposed and unexposed groups in cohort and cross-sectional studies.

**Note:** An Explanation and Elaboration article discusses each checklist item and gives methodological background and published examples of transparent reporting. The STROBE checklist is best used in conjunction with this article (freely available on the Web sites of PLoS Medicine at <http://www.plosmedicine.org/>, Annals of Internal Medicine at <http://www.annals.org/>, and Epidemiology at <http://www.epidem.com/>). Information on the STROBE Initiative is available at [www.strobe-statement.org](http://www.strobe-statement.org).

# BMJ Open

## Comparison of two malnutrition risk screening tools with nutritional biochemical parameters, BMI and length of stay in Chinese geriatric inpatients: a multicenter, cross-sectional study

|                                 |                                                                                                                                                                                                                                                                                                                                                                                                                                                                                                                                                                                                                                                                                                                                                                                                                                                                                                                                                                                                                                                                                                                                                                                                                                                                                                                                                                                                                                                                                                                                                                                                                                                                                       |
|---------------------------------|---------------------------------------------------------------------------------------------------------------------------------------------------------------------------------------------------------------------------------------------------------------------------------------------------------------------------------------------------------------------------------------------------------------------------------------------------------------------------------------------------------------------------------------------------------------------------------------------------------------------------------------------------------------------------------------------------------------------------------------------------------------------------------------------------------------------------------------------------------------------------------------------------------------------------------------------------------------------------------------------------------------------------------------------------------------------------------------------------------------------------------------------------------------------------------------------------------------------------------------------------------------------------------------------------------------------------------------------------------------------------------------------------------------------------------------------------------------------------------------------------------------------------------------------------------------------------------------------------------------------------------------------------------------------------------------|
| Journal:                        | <i>BMJ Open</i>                                                                                                                                                                                                                                                                                                                                                                                                                                                                                                                                                                                                                                                                                                                                                                                                                                                                                                                                                                                                                                                                                                                                                                                                                                                                                                                                                                                                                                                                                                                                                                                                                                                                       |
| Manuscript ID                   | bmjopen-2018-022993.R3                                                                                                                                                                                                                                                                                                                                                                                                                                                                                                                                                                                                                                                                                                                                                                                                                                                                                                                                                                                                                                                                                                                                                                                                                                                                                                                                                                                                                                                                                                                                                                                                                                                                |
| Article Type:                   | Research                                                                                                                                                                                                                                                                                                                                                                                                                                                                                                                                                                                                                                                                                                                                                                                                                                                                                                                                                                                                                                                                                                                                                                                                                                                                                                                                                                                                                                                                                                                                                                                                                                                                              |
| Date Submitted by the Author:   | 21-Oct-2018                                                                                                                                                                                                                                                                                                                                                                                                                                                                                                                                                                                                                                                                                                                                                                                                                                                                                                                                                                                                                                                                                                                                                                                                                                                                                                                                                                                                                                                                                                                                                                                                                                                                           |
| Complete List of Authors:       | <p>Miao, Jian-Ping; Tongji Hospital of Tongji Medical College of Huazhong University of Science and Technology, Department of Geriatrics; Clinical Research Center for Geriatric Prevention and Treatment and Health Medicine in Hubei Province</p> <p>Quan, Xiao-Qing; Tongji Hospital of Tongji Medical College of Huazhong University of Science and Technology, Department of Geriatrics; Clinical Research Center for Geriatric Prevention and Treatment and Health Medicine in Hubei Province</p> <p>Zhang, Cun-Tai; Tongji Hospital of Tongji Medical College of Huazhong University of Science and Technology, Department of Geriatrics; Clinical Research Center for Geriatric Prevention and Treatment and Health Medicine in Hubei Province</p> <p>Zhu, Hong; the Central Hospital of Wuhan University, Department of Geriatrics</p> <p>Ye, Mei; Zhongnan Hospital of Wuhan University, Department of Geriatrics</p> <p>Shen, Li-Ya; Wuhan No. 6 Hospital, Department of Geriatrics</p> <p>Guo, Qiu-Hui; Wuhan No. 6 Hospital, Department of Geriatrics</p> <p>Zhu, Gang-Yan; Hubei General Hospital, Department of Geriatrics</p> <p>Mei, Qi-Jian; General Hospital of the Yangtze River Shipping</p> <p>Wu, Yan-Xia; Wuhan No 1 Hospital, Department of Geriatrics</p> <p>Li, Shu-Guo; First Clinical Medical College, Three Gorges University &amp; Yichang Central People's Hospital, Department of Geriatrics</p> <p>Zhou, Hong-Lian; Tongji Hospital of Tongji Medical College of Huazhong University of Science and Technology, Department of Geriatrics; Clinical Research Center for Geriatric Prevention and Treatment and Health Medicine in Hubei Province</p> |
| <b>Primary Subject Heading</b>: | Nutrition and metabolism                                                                                                                                                                                                                                                                                                                                                                                                                                                                                                                                                                                                                                                                                                                                                                                                                                                                                                                                                                                                                                                                                                                                                                                                                                                                                                                                                                                                                                                                                                                                                                                                                                                              |
| Secondary Subject Heading:      | Nutrition and metabolism                                                                                                                                                                                                                                                                                                                                                                                                                                                                                                                                                                                                                                                                                                                                                                                                                                                                                                                                                                                                                                                                                                                                                                                                                                                                                                                                                                                                                                                                                                                                                                                                                                                              |
| Keywords:                       | malnutrition risk, NRS2002, MNA, older patients                                                                                                                                                                                                                                                                                                                                                                                                                                                                                                                                                                                                                                                                                                                                                                                                                                                                                                                                                                                                                                                                                                                                                                                                                                                                                                                                                                                                                                                                                                                                                                                                                                       |
|                                 |                                                                                                                                                                                                                                                                                                                                                                                                                                                                                                                                                                                                                                                                                                                                                                                                                                                                                                                                                                                                                                                                                                                                                                                                                                                                                                                                                                                                                                                                                                                                                                                                                                                                                       |

1  
2  
3  
4  
5  
6  
7  
8  
9  
10  
11  
12  
13  
14  
15  
16  
17  
18  
19  
20  
21  
22  
23  
24  
25  
26  
27  
28  
29  
30  
31  
32  
33  
34  
35  
36  
37  
38  
39  
40  
41  
42  
43  
44  
45  
46  
47  
48  
49  
50  
51  
52  
53  
54  
55  
56  
57  
58  
59  
60



1  
2  
3  
4 **Comparison of two malnutrition risk screening tools with nutritional biochemical**  
5 **parameters, BMI and length of stay in Chinese geriatric inpatients: a multicenter,**  
6 **cross-sectional study**  
7  
8  
9

10  
11 Jian-Ping Miao<sup>1,2,3</sup>, Xiao-Qing Quan<sup>1,2,3</sup>, Cun-Tai Zhang<sup>1,2,3</sup>, Hong Zhu<sup>4</sup>, Mei Ye<sup>5</sup>, Li-  
12 Ya Shen<sup>6</sup>, Qiu-Hui Guo<sup>6</sup>, Gang-Yan Zhu<sup>7</sup>, Qi-Jian Mei<sup>8</sup>, Yan-Xia Wu<sup>9</sup>,  
13 Shu-Guo Li<sup>10</sup>, Hong-Lian Zhou<sup>1,2,3\*</sup>  
14  
15  
16  
17  
18  
19  
20

21 **Running title: Malnutrition screening in Chinese geriatric patients**  
22  
23  
24

- 25 1. Department of Geriatrics, Tongji Hospital, Tongji Medical College, Huazhong  
26 University of Science and Technology;  
27  
28 2. Clinical Research Center for Geriatric Prevention and Treatment and Health Medicine  
29 in Hubei Province  
30  
31 3. Clinical Research Center for Treatment and Rehabilitation of Elderly Multi-Organ  
32 Dysfunction in Wuhan  
33  
34 4. Department of Geriatrics, the Central Hospital of Wuhan University;  
35  
36 5. Department of Geriatrics, Zhongnan Hospital of Wuhan University;  
37  
38 6. Department of Geriatrics, Wuhan No. 6 Hospital;  
39  
40 7. Department of Geriatrics, Hubei General Hospital;  
41  
42 8. Department of Geriatrics, General Hospital of the Yangtze River Shipping;  
43  
44 9. Department of Geriatrics, Wuhan No 1 Hospital;  
45  
46 10. Department of Geriatrics, First Clinical Medical College, Three Gorges University &  
47 Yichang Central People's Hospital.  
48  
49  
50  
51

52  
53  
54 JPM and XQQ contributed equally.  
55  
56  
57

1  
2  
3  
4  
5  
6  
7  
8  
9  
10  
11  
12  
13  
14  
15  
16  
17  
18  
19  
20  
21  
22  
23  
24  
25  
26  
27  
28  
29  
30  
31  
32  
33  
34  
35  
36  
37  
38  
39  
40  
41  
42  
43  
44  
45  
46  
47  
48  
49  
50  
51  
52  
53  
54  
55  
56  
57  
58  
59  
60

Correspondence to Dr Hong-Lian Zhou; zhouhonglian63@163.com

For peer review only

## ABSTRACT

**Objectives:** The aim of this study was to assess malnutrition risk in Chinese geriatric inpatients with Nutritional Risk Screening (NRS2002) and Mini-Nutritional Assessment (MNA), and to identify the most appropriate nutritional screening tool for these patients.

**Design:** Cross-sectional study.

**Setting:** Eight medical centers in Hubei province, China.

**Participants:** A total of 425 inpatients aged  $\geq 70$  years were consecutively recruited between December 2014 and May 2016.

**Primary and secondary outcome measures:** Nutritional risk was assessed using NRS2002, MNA, anthropometric measurements and biochemical parameters within 24 hours of admission. Comorbidities and length of hospitalization were recorded. Nutritional parameters, BMI and length of hospital stay were employed to compare MNA and NRS2002. Besides, Kappa analysis was used to evaluate the consistency of the two tools.

**Results:** The average age was  $81.2 \pm 5.9$  years (range, 70-98). The prevalence of undernutrition classified by NRS2002 and MNA was 40.9% and 58.6%, respectively. Patients undergoing malnutrition had lower BMI, hemoglobin, albumin and prealbumin ( $P < 0.05$ ), and longer length of hospital stay (LOS) ( $P < 0.05$ ). The NRS2002 showed moderate agreement ( $\kappa = 0.521$ ,  $P < 0.001$ ) with MNA. Both tools presented significant correlation with age, BMI and laboratory parameters ( $P < 0.001$ ). In addition, a significant association between both tools and LOS was found ( $P < 0.05$ ). Besides, the NRS2002 was not different from MNA for predicting nutritional risk in terms of the area under receiver

operating characteristic curve ( $P>0.05$ ).

**Conclusions:** The results show a relatively high prevalence of malnutrition risk in our sample cohort. We found that NRS2002 and MNA both were suitable to screen malnutrition risk among Chinese geriatric inpatients.

### Strengths and limitations of this study

- ▶ This study assessed the risk of malnutrition among Chinese elderly inpatients with two different tools (NRS2002 and MNA).
- ▶ The study provides useful information to assess the risk of malnutrition among Chinese elderly inpatients.
- ▶ The consensus statement with diagnostic criteria for malnutrition was proposed in 2015 after our study initiated, and thus it was not utilized in our study.
- ▶ Regarding the cross-classification of MNA, more patients will be categorized as at risk since the two groups malnourished and at risk are combined.
- ▶ In addition to nutritional status, LOS could also be influenced by age, financial situation, comorbidities and so on, which may explain the low  $R^2$  regarding simple linear regression analysis.

**Keywords:** malnutrition risk; NRS2002; MNA; older patients

## INTRODUCTION

Malnutrition is a common condition affecting almost 13-78% of the elderly population.<sup>1</sup> It is highly associated with numerous adverse outcomes including frailty,<sup>2</sup> muscle wasting<sup>3</sup>, weakened immune system<sup>4</sup>, longer hospitalization,<sup>5</sup> increased morbidity<sup>6</sup> and mortality.<sup>7, 8</sup> These outcomes contribute to large increases in medical expenditures.<sup>9</sup> Early identification and treatment of malnutrition can lead to better quality of life<sup>10</sup> and improved outcomes<sup>11</sup> in older inpatients. Therefore, it is essential to apply appropriate tools to assess the risk of malnutrition in geriatric patients.

Nutritional risk screening and nutritional assessment tools are readily available nowadays.<sup>12</sup> These tools are used to identify patients with nutritional risk or nutritional deficiencies and to determine if intervention is needed. There are a variety of nutritional risk screening methods,<sup>13</sup> mainly involving anthropometric and biochemical parameters. However, to date, no single tool has been considered as the universal gold standard for the assessment of nutritional risk among the older inpatients.

The Nutritional Risk Screening (NRS2002) is recommended for hospitalized patients by the European Society of Parenteral and Enteral Nutrition (ESPEN).<sup>14</sup> It can quickly determine whether a patient needs nutritional support, especially for patients with acute complications.<sup>15, 16</sup> However, the use of NRS2002 excludes patients who cannot be weighed or have problems of communication and the tool is not specifically developed for older patients.



1  
2  
3  
4 The Mini-Nutritional Assessment (MNA) is established for the nutritional screening  
5  
6 and assessment in the geriatrics settings.<sup>1, 17</sup> The ESPEN recommends using this tool for  
7  
8 elderly populations.<sup>18</sup> The MNA was validated against a clinical evaluations of two  
9  
10 geriatrics, including biochemical parameters (nutritional parameters, C-reactive protein,  
11  
12 cholesterol, vitamins), anthropometry (BMI, brachial circumference, calf circumference,  
13  
14 skinfold width of the triceps and subscapular muscles), dietary components and functional  
15  
16 assessment outcomes.<sup>19</sup> It has been shown to predict outcomes, functional status, mortality,  
17  
18 number of hospital visits and the related healthcare costs.<sup>18, 20-23</sup> In comparison with the  
19  
20 NRS2002, the MNA is more time consuming.<sup>24</sup> Hence, two short forms of the MNA have  
21  
22 been developed and validated, the most recently the revised MNA-SF by Kaiser *et al*<sup>25</sup>,  
23  
24 which is currently the recommended version of the MNA for clinical use. This instrument  
25  
26 only incorporates 6 of the original 18 items and takes approximately 5 minutes to perform.  
27  
28  
29  
30  
31  
32  
33  
34

35  
36 Although a number of studies suggested that serum proteins are associated with  
37  
38 malnutrition, the nature of this association is controversial.<sup>26-28</sup> In addition, hemoglobin  
39  
40 and total lymphocyte count were also proposed as useful indicators of nutritional status.<sup>27</sup>  
41  
42  
43  
44 <sup>29</sup> The aim of our study was to assess the risk of malnutrition among Chinese older  
45  
46 participants with two different tools (NRS2002 and MNA), to compare them in terms of  
47  
48 nutritional biochemical parameters and length of hospital stay (LOS), and determine the  
49  
50 most appropriate tool for these patients. We hypothesized that both tools were suitable for  
51  
52 the study population.  
53  
54  
55  
56  
57  
58  
59  
60

## METHODS

### Study subjects

This study consecutively recruited patients older than 70 years of age who attended internal medicine of geriatrics department of eight large size Tertiary comprehensive hospitals in Hubei Province from December 2014 to May 2016. The eight hospitals are as follows: (1) Tongji Hospital, Tongji Medical College, Huazhong University of Science and Technology, (2) The Central Hospital of Wuhan University, (3) Zhongnan Hospital of Wuhan University, (4) Wuhan No. 6 Hospital, Affiliated Hospital of Jiangnan University, (5) Hubei General Hospital, (6) General Hospital of The Yangtze River Shipping, (7) Wuhan No. 1 Hospital, (8) The First College of Clinical Medical Science, Three Gorges University and Yichang Central People's Hospital.

This cross-sectional study received approval from the institutional Ethics Committee and all subjects signed written informed consent before participation. Inclusion criteria were: (1) age 70 years or older, (2) the patients themselves or their proxies could clearly answer study questions, (3) hospital stay was longer than 24 hours and (4) patients were willing to cooperate with the study. Exclusion criteria included: (1) younger than 70 years old, (2) refusal to participate in the study and (3) patients was unconscious or unable to answer the study questions (Figure 1).

## Nutritional risk screening 2002 (NRS2002)

The NRS2002 consists of the following parameters: the severity of acute illness, BMI, patient appetite, accidental weight loss and patient age.<sup>15</sup> The total score ranges from 0 to 7.<sup>16</sup> For investigational purposes, patients were categorized into two groups: a total score  $\geq 3$  indicates under-nourished (at nutritional risk/malnourished) and 0-2 indicates normal nutrition status.<sup>14, 30</sup> A nutritional care plan was initiated for patients with a score  $\geq 3$ .<sup>31</sup>

## Mini-Nutritional Assessment (MNA)

The MNA is consisted of four parts: anthropometric assessment (0-8 points), general assessment (0-9 points), dietetic habits evaluation (0-9 points) and self-assessment of the nutrition and health status (0-4 points).<sup>32</sup> A score below 17 indicates malnutrition, 17-23.5 indicates malnutrition risk and 24-30 indicates well-nourished.<sup>33</sup> In addition, a nutritional care plan was initiated for patients with a score  $< 17$ .<sup>31</sup>

## Data Collecting

Each hospital had 2 researchers trained before the start of the study. The main contents were about how to interpret the questions in the instruments (MNA and NRS2002) and how to perform the measurements. The patients were evaluated with both MNA and NRS2002 by two trained researchers on the first day of admission or early morning of the

1  
2  
3  
4 next day.  
5  
6

7 Comorbidities and length of hospitalization were obtained from medical records.  
8  
9 Patients were diagnosed by their bedside clinician and superior clinicians. Two trained  
10 researchers of each hospital verified the diagnoses and acquired data. Both body height and  
11  
12 researchers of each hospital verified the diagnoses and acquired data. Both body height and  
13  
14 weight were measured at 6-8 am within 24 hours after admission. Patients were asked to  
15  
16 be fasting, only wearing ward clothes and taking off shoes before measurement. Besides,  
17  
18 height was measured with a calibrated scale (corrected to  $\pm 0.5$  cm). The actual body mass  
19  
20 was measured with a calibrated scale (corrected to  $\pm 0.2$  kg). Then, the body mass index  
21  
22 (BMI) was calculated as weight/height squared ( $\text{kg}/\text{m}^2$ ).  
23  
24  
25  
26  
27

28 Blood samples were also obtained within 24 hours after admission. Nutritional  
29  
30 biochemical parameters including serum hemoglobin (Hb), total lymphocyte count (TLC),  
31  
32 albumin (ALB) and prealbumin (PAB) were examined in the hospital's clinical chemistry  
33  
34 laboratory. Malnutrition was determined when the value of Hb was  $< 120$  g/L for males and  
35  
36  $< 110$  g/L for females. The cutoff value of ALB was 35 g/L (normal range 35-55 g/L), PAB  
37  
38 was 200mg/L (normal range 200-400 mg/L) and TLC was  $1.1 \times 10^9/\text{L}$  (normal range 1.1-  
39  
40  $3.2 \times 10^9/\text{L}$ ) for both genders for malnutrition.<sup>34</sup> Moreover, based on previous research<sup>35</sup>,  
41  
42 the cutoff value of BMI was set at  $20.5 \text{ kg}/\text{m}^2$  for malnutrition.  
43  
44  
45  
46  
47  
48  
49  
50  
51  
52

### 53 **Patient and public involvement**

54  
55  
56 Patients did not participate in the design and conception of the proposed study. No  
57  
58  
59  
60

1  
2  
3  
4 patients were asked to advice on interpretation or writing up of results. Besides, the results  
5  
6 of measurements would be disseminated to participants immediately after the investigation.  
7  
8  
9

### 10 11 12 **Statistical analysis**

13  
14 The statistical analyses were conducted using SPSS 19.0. Data were presented as  
15  
16 mean  $\pm$  standard deviation and ranges in blanket. The chi-square test or student's *t*-test was  
17  
18 used according to the data type. One-way analysis of variance was applied for multigroup  
19  
20 comparisons and correlation analysis was qualified by the Pearson correlation test. The  
21  
22 simple linear regression analysis was used to estimate the relationship between both  
23  
24 instruments (MNA/NRS2002) and LOS. Agreement between the two screening tools was  
25  
26 achieved by the kappa ( $\kappa$ ) statistic. The results were interpreted as follows:  $<0$ , no  
27  
28 agreement; 0-0.19, poor concordance; 0.20-0.39, fair agreement; 0.40-0.59, moderate  
29  
30 agreement; 0.60-0.79, substantial agreement; and 0.80-1.00, almost perfect agreement.<sup>29</sup> In  
31  
32 addition, the receiver operating characteristic (ROC) curve was applied to compare MNA  
33  
34 and NRS2002 separately with nutritional parameters using Medcalc 18.6. The level of  
35  
36 significance was set at  $P < 0.05$ .  
37  
38  
39  
40  
41  
42  
43  
44  
45  
46  
47  
48  
49  
50  
51

## 52 53 **RESULTS**

54  
55  
56 Over the study period, a total of 425 individuals from the Department of Geriatrics of

57 10  
58  
59  
60

1  
2  
3  
4 eight hospitals in Hubei Province met the eligibility criteria and completed a nutrition  
5  
6 assessment within 24 hours of admission (Figure 1). The average age was  $81.2\pm 5.9$  years  
7  
8 (range, 70-98) and 31.1% were females. The average body mass index was  $23.2\pm 3.7$  kg/m<sup>2</sup>  
9  
10 (range, 11.1-34.1). The average length of hospitalization was  $21.9\pm 13.8$  days (range, 4-  
11  
12 133). The most frequent cause of hospitalization was cardiac disease, followed by  
13  
14 pulmonary infection, hypertension, cerebrovascular diseases, digestive disease and  
15  
16 malignancies. However, the most frequent comorbidities were hypertension, diabetes  
17  
18 mellitus, cardiac disease and cerebrovascular disease. Characteristics of study participants  
19  
20 are shown in Table 1.  
21  
22  
23  
24  
25  
26  
27

28 According to the NRS2002, approximately 174 patients (40.9%) were under-  
29  
30 nourished and 251 patients (59.1%) were at normal nutritional status. The MNA  
31  
32 demonstrated that 99 patients (23.3%) were malnourished, 150 patients (35.3%) were at  
33  
34 risk of malnutrition and 176 patients (41.4%) had a normal nutritional status.  
35  
36  
37

38 Table 2 showed the risk of undernutrition, varying from 23.7% to 58.6%, according  
39  
40 to the different methods employed in the current work. The risk of under-nourished  
41  
42 participants classified by NRS2002, MNA, BMI, ALB, PAB, TLC were 40.9%, 58.6%,  
43  
44 23.7%, 28.7%, 47.3%, 35.9%, respectively. The risk of malnutrition was higher in men  
45  
46 than that in women according to hemoglobin (41.7% vs 25.6%, respectively).  
47  
48  
49  
50

51 Although both instruments were closely related to each other ( $P<0.001$ ), they showed  
52  
53 substantial differences. Table 3 showed the cross-classification of MNA and NRS2002  
54  
55  
56  
57

1  
2  
3  
4 regarding two nutritional categories. The MNA classified more patients as under-nourished  
5  
6 than the NRS2002 (249 vs 174, respectively). Among the 249 patients classified as under-  
7  
8 nourished by the MNA, the NRS2002 coincidentally categorized 159 as malnourished, and  
9  
10 90 as well-nourished. The NRS2002, on the other hand, classified 174 patients as under-  
11  
12 nourished. Within this group of participants, the MNA classified 159 patients as under-  
13  
14 nourished and 15 as well-nourished. What's more, a participant considered by the MNA to  
15  
16 be well-nourished can be classified as under-nourished using the NRS2002. The individual  
17  
18 categorization of nutritional status presented moderate agreement between MNA and  
19  
20 NRS2002 ( $\kappa=0.521$ ,  $P<0.001$ ).  
21  
22  
23  
24  
25  
26

27 Data of Hb, TLC, ALB and PAB concentrations are listed in Table 2 and additional  
28  
29 Table 1. There existed significant decrease of ALB, PAB, Hb and TLC in the three groups  
30  
31 of MNA scores ( $P<0.001$  and  $P=0.023$ , Figure 2a). Specifically, the group with the lowest  
32  
33 MNA score  $<17$  ( $n=99$ ), indicating a poor nutritional state, had an average serum albumin  
34  
35 of  $33.3\pm 4.8$  g/L (range, 22.8-43.2), an average prealbumin of  $140.8\pm 81.7$  mg/L (range, 12-  
36  
37 339) and an average hemoglobin of  $109.0\pm 20.8$  g/L (range, 57-150.2) as well as an average  
38  
39 lymphocyte count of  $1.5\pm 1.2$   $10^9$ /L (range, 0.3-6.6). In the risk of malnutrition group with  
40  
41 an MNA score of 17-23.5 ( $n=150$ ), average serum albumin was  $37.9\pm 5.6$  g/L (range, 21.6-  
42  
43 70), average prealbumin  $192.3\pm 61.8$  mg/L (range, 8-380), average hemoglobin  $120.2\pm 22.0$   
44  
45 g/L (range, 55-181) and an average lymphocyte count of  $1.3\pm 0.56$   $10^9$ /L (range, 0.2-2.9).  
46  
47 The group with  $MNA\geq 24$  ( $n=180$ ) had an average serum albumin concentration of  
48  
49  $39.8\pm 3.8$  g/L (range, 29.3-54), an average prealbumin of  $216.7\pm 54.4$  mg/L (range, 25-337),  
50  
51  
52  
53  
54  
55  
56  
57  
58  
59  
60

1  
2  
3  
4 an average hemoglobin of  $127.6 \pm 15.3$  g/L (range, 81-173) and an average lymphocyte  
5  
6 count of  $1.5 \pm 0.7 \times 10^9$ /L (range, 0.3-4.3; Figure 2a, additional Table 1).  
7

8  
9 Similarly, ALB, PAB and Hb gradually declined with increasing risk of malnutrition  
10  
11 according to NRS2002 results ( $P < 0.001$ , figure 2b). In under-nourished patients (NRS2002:  
12  
13 3-7, n=174), average serum albumin was  $35.1 \pm 5.6$  g/L (range, 21.6-50.2), average  
14  
15 prealbumin  $148.5 \pm 79.3$  mg/L (range, 17-339) and average hemoglobin  $113.3 \pm 23.6$  g/L  
16  
17 (range, 55-181). In the normal nutritional state group (NRS2002: 0-2, n=251), the results  
18  
19 were as follows: albumin  $39.4 \pm 4.5$  g/L (range, 26.4-70), prealbumin  $210.2 \pm 56.1$  mg/L  
20  
21 (range, 8-380) and hemoglobin  $125.8 \pm 16.2$  g/L (range, 72-173). By contrast, no difference  
22  
23 in lymphocyte count was found in both groups ( $P = 0.089$ , Figure 2b, additional Table 1).  
24  
25  
26  
27  
28  
29

30 Table 4 showed the Pearson correlation coefficients of MNA and NRS2002 scores  
31  
32 with BMI, serum parameters and LOS. BMI, Hb, ALB and PAB correlated negatively with  
33  
34 malnutrition scores of NRS2002, while showed positive correlation with the MNA scores  
35  
36 ( $P < 0.001$ ). There existed an inverse correlation between age and the two tools ( $P < 0.001$ ).  
37  
38 Besides, a significant association between both tools and LOS was demonstrated ( $P < 0.05$ ).  
39  
40  
41  
42 No correlation was found between TLC and the two tools.  
43  
44

45 Table 5 showed the simple linear regression of LOS. There was a linear correlation  
46  
47 between the MNA scores and LOS ( $P < 0.05$ ) and so was the NRS2002 scores ( $P < 0.01$ ).  
48  
49

50 Figure 3 showed the ROC curve analysis of the sensitivities and specificities of MNA  
51  
52 and NRS2002 for predicting nutritional risk. The comparison between MNA and NRS2002  
53  
54 in those patients revealed the area under ROC curve (AUC) values for MNA (0.794, ALB;  
55  
56  
57  
58  
59  
60



1  
2  
3  
4 0.704, PAB; 0.702, Hb; 0.581, TLC) and NRS2002 (0.761, ALB; 0.616, PAB; 0.677, Hb;  
5  
6 0.586, TLC). Besides, the comparison between the AUC showed that NRS2002 was not  
7  
8 different from MNA for predicting nutritional risk ( $P=0.191$ , ALB;  $P=0.063$ , PAB;  
9  
10  $P=0.299$ , Hb;  $P=0.866$ , TLC).  
11  
12  
13  
14  
15  
16  
17  
18  
19

## 20 **DISCUSSION**

21  
22 Based on the current study, the nutritional health of older inpatients was assessed  
23  
24 using NRS2002, MNA, BMI, Hb, TLC, ALB and PAB. The results showed that the overall  
25  
26 prevalence of malnutrition risk for the enrolled older patients ranged from 23.7% to 58.6%.  
27  
28 The highest prevalence of malnutrition risk was detected by MNA and the lowest by BMI.  
29  
30 These results illustrated the differences in nutritional risk detected by different screening  
31  
32 tools.  
33  
34  
35  
36

37  
38 Biochemical markers possess many advantages in assessing the nutritional status,  
39  
40 such as fast application and low cost. In addition, they can also be incorporated into the  
41  
42 routine of clinical application. As the most abundant plasmatic protein, albumin is  
43  
44 commonly used in the assessment of malnutrition.<sup>36</sup> In several of studies, low serum ALB  
45  
46 correlated with longer hospitalization, medical complications, and increased mortality.<sup>36-38</sup>  
47  
48 Nevertheless, its value is still limited by the long half-life (14-20 days), inflammation, the  
49  
50 impairment of hepatic or renal, and possibly aging itself.<sup>27</sup> Due to the reasons above, the  
51  
52 prevalence of malnutrition detected by ALB is lower than MNA and NRS2002 in our study.  
53  
54  
55  
56  
57  
58  
59  
60

1  
2  
3  
4 Comparatively, a study by Covinsky *et al*<sup>39</sup> showed ALB is highly sensitive yet low  
5  
6 specific in the diagnosis of malnutrition in the hospitalized older adults.  
7

8  
9 Prealbumin has been regarded as a more sensitive marker than albumin for acute  
10  
11 nutritional changes, as it has a shorter half-life (2-3 days). However, its functions in  
12  
13 nutritional screening and mortality prediction remain controversial.<sup>40-43</sup> In our study,  
14  
15 prealbumin levels showed a great decline with deteriorating nutrition status assessed by  
16  
17 both NRS2002 and MNA. The correlation between serum prealbumin and MNA is  
18  
19 consistent with one study<sup>44</sup>, yet is in contrast with another report.<sup>42</sup> This latter study had a  
20  
21 small sample size (23 older patients), which may account for the discrepancies. Similar to  
22  
23 serum albumin, the usage of prealbumin in predicting malnutrition is limited due to  
24  
25 systemic inflammatory diseases.<sup>41, 45</sup>  
26  
27  
28  
29  
30  
31

32 Hemoglobin has been demonstrated to decrease with progressive malnutrition.<sup>46, 47</sup>  
33  
34 This relationship, consistent with a recent analysis performed in Northern China<sup>29</sup>, is found  
35  
36 in the proposed study. Total lymphocyte count was assumed to be suitable in screening test  
37  
38 for assessing malnutrition and being an indicator of a poor prognosis.<sup>27</sup> In agreement with  
39  
40 Lei *et al*<sup>48</sup>, we also found a significant correlation between TLC and MNA. However, no  
41  
42 correlation was found between NRS2002 and TLC, which was consistent with a previous  
43  
44 study.<sup>29</sup>  
45  
46  
47  
48  
49

50 The prevalence of malnutrition diagnosed by BMI was far below that detected by  
51  
52 MNA. Consistent with findings from another study<sup>49</sup>, this study suggested that malnutrition  
53  
54 was also under diagnosed when using BMI as the sole criteria. The reason is most possibly  
55  
56  
57  
58  
59  
60

1  
2  
3  
4 related to water-sodium retention in patients, leading to an overestimation of their true  
5  
6 weight.<sup>50</sup> In spite of this, low BMI was significantly associated with mortality.<sup>51</sup>  
7  
8

9 Our study revealed that NRS2002 and MNA, in moderate agreement with each other,  
10  
11 were consistently associated with age, BMI, Hb, ALB and PAB. Nevertheless, the MNA  
12  
13 identified more patients with or at risk of malnutrition than the NRS2002 did. The lower  
14  
15 percentage of malnutrition classified by NRS2002 may be explained in several ways. First,  
16  
17 the NRS2002 mainly consider the influence of acute diseases on nutritional status, while  
18  
19 the MNA take chronic long-term condition into consideration, such as psychological  
20  
21 factors and the BMI. Psychological factors may play a large role in the nutritional status of  
22  
23 older inpatients. In addition, we categorized undernutrition as  $NRS2002 \geq 3$ , while patients  
24  
25 with a score of 1-2 indicates low risk of malnutrition.<sup>52</sup> This may have underestimated the  
26  
27 percentage of malnutrition. Moreover, our study subjects were internal medical patients,  
28  
29 among which the proportion of overweight and obesity was high. The NRS2002 takes BMI  
30  
31  $< 18.5 \text{ kg/m}^2$  as one of the criteria, leading to a lower proportion of malnutrition with  
32  
33 NRS2002 than that of MNA. Our results agree with findings from Raslan *et al*,<sup>5</sup> yet differ  
34  
35 from the study conducted by Drescher *et al*.<sup>52</sup> The latter study was conducted in older  
36  
37 patients with acute disease, which may explain the difference.  
38  
39  
40  
41  
42  
43  
44  
45  
46  
47

48 Norman *et al* suggested that there exists a close relationship between the degree of  
49  
50 malnutrition and LOS.<sup>53</sup> In the present study, we found the linear relation between both  
51  
52 instruments (MNA and NRS2002) and LOS. Our findings corroborated those of the study  
53  
54 conducted by Bauer *et al*,<sup>54</sup> showing longer hospital stay was associated with malnutrition  
55  
56  
57  
58  
59  
60

1  
2  
3  
4 assessed by the MNA. Comparison of the MNA and NRS2002 and their ability to predict  
5  
6 nutritional risk according to different standards showed that MNA and NRS2002 were the  
7  
8 both suitable screening tools, in terms of the ROC curve area. Therefore, we conclude, that  
9  
10 in Chinese geriatric inpatients, the NRS2002 and MNA might reflect malnutrition or the  
11  
12 studied biochemical parameters, as well as predict the length of hospitalization. However,  
13  
14 the MNA was available for identifying most of the patients with or at risk of malnutrition.  
15  
16  
17  
18  
19  
20  
21  
22  
23

### 24 **Limitations**

25  
26  
27 Our study still has some limitations. First, a consensus statement with diagnostic criteria  
28  
29 for malnutrition was proposed in 2015<sup>55</sup> after our study initiated and thus it was not utilized  
30  
31 in our study. Second, BMI and age were parts of the screening tools, therefore already  
32  
33 correlated with the MNA and NRS2002 assessment. Besides, in addition to nutritional  
34  
35 status, LOS could also be influenced by age, financial situation, comorbidities and so on,  
36  
37 which may explain the low  $R^2$  between both instruments and LOS. Finally, regarding the  
38  
39 cross-classification of MNA, more patients will be categorized as at risk since the two  
40  
41 groups malnourished and at risk are combined, which may contribute to the low Kappa  
42  
43 value between the two instruments.  
44  
45  
46  
47  
48  
49

## 50 **CONCLUSION**

51  
52  
53 To conclude, the results of the present study show a high prevalence of malnutrition  
54  
55 risk in Chinese geriatric hospitalized patients. Although the nutritional risk varied  
56  
57

1  
2  
3  
4 depending on the applied method, both NRS2002 and MNA correlated with each other and  
5  
6 with age, BMI and laboratory parameters. Besides, both tools were proved to be a good  
7  
8 predictor of the length of hospitalization. Moreover, the NRS2002 was not different from  
9  
10 MNA for predicting nutritional risk according to the AUC. Therefore, this study suggested  
11  
12 NRS2002 and MNA both were suitable to screen malnutrition risk among Chinese geriatric  
13  
14 inpatients. We recommend using one of them in admission.  
15  
16  
17  
18  
19  
20  
21  
22  
23

24  
25 **Acknowledgements** We are appreciated for the participating volunteer patients, the local  
26  
27 research ethics committee and the individual researchers, clinicians and nurses for their  
28  
29 participation in the data collection.  
30  
31  
32  
33  
34  
35

36  
37 **Contributors** JPM, XQQ and HLZ are main contributors to the design of the present study.  
38  
39 JPM and XQQ contributed to the study conception and design. HLZ and CTZ, took part in  
40  
41 the discussion and modification of the study design. HZ, MY, LYS, QHG, GYZ, QJM,  
42  
43 YXW, and SGL contributed to the study conception. XQQ, HZ, MY, LYS, QHG, GYZ,  
44  
45 QJM, YXW and SGL were involved in the acquisition of data. JPM and XQQ made  
46  
47 contributions to the drafting of the manuscript. HLZ and CTZ were involved in the critical  
48  
49 revision. All the authors were involved in the analysis and interpretation of the data and  
50  
51 gave their final approval.  
52  
53  
54  
55  
56  
57  
58  
59  
60

1  
2  
3  
4  
5  
6 **Funding** This project was funded by the National Natural Science Foundation of China  
7  
8 (Grant No. 81400255).  
9

10  
11  
12  
13  
14  
15  
16 **Competing interests** None declared.  
17

18  
19  
20  
21  
22  
23 **Ethics approval** Ethics Review Board of Tongji Hospital, Tongji Medical College,  
24  
25 Huazhong University of Science and Technology (TJ-C20141112).  
26  
27  
28  
29  
30

31 **Provenance and peer review** Not commissioned; externally peer reviewed.  
32  
33  
34  
35  
36  
37  
38

39 **Data sharing statement** No additional data are available.  
40  
41  
42  
43  
44

45 **Open Access** This is an Open Access article distributed in accordance with the Creative  
46  
47 Commons Attribution Non Commercial (CC BY-NC 4.0) license, which permits others to  
48  
49 distribute, remix, adapt, build upon this work non-commercially, and license their  
50  
51 derivative works on different terms, provided the original work is properly cited and the  
52  
53 use is non-commercial. See: <http://creativecommons.org/licenses/by-nc/4.0/>  
54  
55  
56  
57

1  
2  
3  
4  
5  
6  
7  
8  
9  
10  
11  
12  
13  
14  
15  
16  
17  
18  
19  
20  
21  
22  
23  
24  
25  
26  
27  
28  
29  
30  
31  
32  
33  
34  
35  
36  
37  
38  
39  
40  
41  
42  
43  
44  
45  
46  
47  
48  
49  
50  
51  
52  
53  
54  
55  
56  
57  
58  
59  
60

For peer review only

1  
2  
3 **Figure legend**  
4  
5

6 **Figure 1** Flow diagram of participant inclusion and exclusion.  
7  
8

9  
10 **Figure 2** MNA (a) and NRS2002 (b) referring to serum albumin, prealbumin, hemoglobin  
11 and blood lymphocytes count respectively.  
12  
13

14  
15  
16 **Figure 3** Receiver operating characteristics of sensitivity and specificity of predicted  
17 probabilities for nutritional risk incorporating the MNA score or the NRS2002 score.  
18  
19  
20  
21  
22  
23  
24  
25  
26  
27  
28  
29  
30  
31  
32  
33  
34  
35  
36  
37  
38  
39  
40  
41  
42  
43  
44  
45  
46  
47  
48  
49  
50  
51  
52  
53  
54  
55  
56  
57  
58  
59  
60



**REFERENCES**

1. Guigoz Y. The Mini Nutritional Assessment (MNA) review of the literature--What does it tell us? *J Nutr Health Aging*. 2006;10:466-85; discussion 485-7.
2. Chang SF. Frailty Is a Major Related Factor for at Risk of Malnutrition in Community-Dwelling Older Adults. *J Nurs Scholarsh*. 2017;49:63-72.
3. Lumale S. [Nutritional management of elderly people, everyone's concern]. *Rev Infirm*. 2017;66:25-26.
4. Lesourd B. Nutritional factors and immunological ageing. *Proc Nutr Soc*. 2006;65:319-25.
5. Raslan M, Gonzalez MC, Dias MC, *et al*. Comparison of nutritional risk screening tools for predicting clinical outcomes in hospitalized patients. *Nutrition*. 2010;26:721-6.
6. Ehwerhemuepha L, Bendig D, Steele C, *et al*. The Effect of Malnutrition on the Risk of Unplanned 7-Day Readmission in Pediatrics. *Hosp Pediatr*. 2018.
7. Ahmed N, Choe Y, Mustad VA, *et al*. Impact of malnutrition on survival and healthcare utilization in Medicare beneficiaries with diabetes: a retrospective cohort analysis. *BMJ Open Diabetes Res Care*. 2018;6:e000471.
8. Sharma Y, Miller M, Kaambwa B, *et al*. Malnutrition and its association with readmission and death within 7 days and 8-180 days postdischarge in older patients: a prospective observational study. *BMJ Open*. 2017;7:e018443.
9. Khalatbari-Soltani S, Marques-Vidal P. The economic cost of hospital malnutrition in Europe; a narrative review. *Clin Nutr ESPEN*. 2015;10:e89-e94.
10. Bouillanne O, Curis E, Hamon-Vilcot B, *et al*. Impact of protein pulse feeding on lean mass in malnourished and at-risk hospitalized elderly patients: a randomized controlled trial. *Clin Nutr*. 2013;32:186-92.
11. Ballesteros-Pomar MD, Martinez Llinas D, Goates S, *et al*. Cost-Effectiveness of a Specialized Oral Nutritional Supplementation for Malnourished Older Adult Patients in Spain. *Nutrients*. 2018;10.
12. Racic M, Ivkovic N, Kusmuk S. [Screening of Nutritional Status among Elderly People at Family Medicine]. *Acta Med Croatica*. 2015;69:347-56.
13. Abd Aziz NAS, Teng N, Abdul Hamid MR, *et al*. Assessing the nutritional status of hospitalized elderly. *Clin Interv Aging*. 2017;12:1615-1625.
14. Elia M, Stratton R. On the ESPEN guidelines for nutritional screening 2002. *Clin Nutr*. 2004;23:131-2.
15. Kondrup J, Rasmussen HH, Hamberg O, *et al*. Nutritional risk screening (NRS 2002): a new method based on an analysis of controlled clinical trials. *Clin Nutr*. 2003;22:321-36.
16. Kondrup J, Allison SP, Elia M, *et al*. ESPEN guidelines for nutrition screening 2002. *Clin Nutr*. 2003;22:415-21.
17. Guigoz Y, Vellas B, Garry PJ. Assessing the nutritional status of the elderly: The Mini Nutritional Assessment as part of the geriatric evaluation. *Nutr Rev*. 1996;54:S59-65.

18. Bleda MJ, Bolibar I, Pares R, *et al.* Reliability of the mini nutritional assessment (MNA) in institutionalized elderly people. *J Nutr Health Aging.* 2002;6:134-7.
19. Bauer JM, Kaiser MJ, Anthony P, *et al.* The Mini Nutritional Assessment--its history, today's practice, and future perspectives. *Nutr Clin Pract.* 2008;23:388-96.
20. Soderstrom L, Rosenblad A, Adolfsson ET, *et al.* Nutritional status predicts preterm death in older people: a prospective cohort study. *Clin Nutr.* 2014;33:354-9.
21. Dent E, Visvanathan R, Piantadosi C, *et al.* Use of the Mini Nutritional Assessment to detect frailty in hospitalised older people. *J Nutr Health Aging.* 2012;16:764-7.
22. Cabre M, Ferreira C, Arus M, *et al.* Evaluation of CONUT for Clinical Malnutrition Detection and Short-Term Prognostic Assessment in Hospitalized Elderly People. *J Nutr Health Aging.* 2015;19:729-33.
23. Chavarro-Carvajal D, Reyes-Ortiz C, Samper-Ternent R, *et al.* Nutritional assessment and factors associated to malnutrition in older adults: a cross-sectional study in Bogota, Colombia. *J Aging Health.* 2015;27:304-19.
24. Kyle UG, Kossovsky MP, Karsegard VL, *et al.* Comparison of tools for nutritional assessment and screening at hospital admission: a population study. *Clin Nutr.* 2006;25:409-17.
25. Kaiser MJ, Bauer JM, Ramsch C, *et al.* Validation of the Mini Nutritional Assessment short-form (MNA-SF): a practical tool for identification of nutritional status. *J Nutr Health Aging.* 2009;13:782-8.
26. Sergi G, Coin A, Enzi G, *et al.* Role of visceral proteins in detecting malnutrition in the elderly. *Eur J Clin Nutr.* 2006;60:203-9.
27. Omran ML, Morley JE. Assessment of protein energy malnutrition in older persons, Part II: Laboratory evaluation. *Nutrition.* 2000;16:131-40.
28. Omran ML, Morley JE. Assessment of protein energy malnutrition in older persons, part I: History, examination, body composition, and screening tools. *Nutrition.* 2000;16:50-63.
29. Zhou J, Wang M, Wang H, *et al.* Comparison of two nutrition assessment tools in surgical elderly inpatients in Northern China. *Nutr J.* 2015;14:68.
30. Thoresen L, Frykholm G, Lydersen S, *et al.* Nutritional status, cachexia and survival in patients with advanced colorectal carcinoma. Different assessment criteria for nutritional status provide unequal results. *Clin Nutr.* 2013;32:65-72.
31. Wei J, Chen W, Zhu M, *et al.* Guidelines for parenteral and enteral nutrition support in geriatric patients in China. *Asia Pac J Clin Nutr.* 2015;24:336-46.
32. Jacobsen EL, Brovold T, Bergland A, *et al.* Prevalence of factors associated with malnutrition among acute geriatric patients in Norway: a cross-sectional study. *BMJ Open.* 2016;6:e011512.
33. Guigoz Y, Vellas B. The Mini Nutritional Assessment (MNA) for grading the nutritional state of elderly patients: presentation of the MNA, history and validation. *Nestle Nutr Workshop Ser Clin Perform Programme.* 1999;1:3-11; discussion 11-2.
34. Blackburn GL, Bistrian BR, Maini BS, *et al.* Nutritional and metabolic assessment of

- 1  
2  
3 the hospitalized patient. *JPEN J Parenter Enteral Nutr.* 1977;1:11-22.
- 4 35. Zhou J, Wang M, Wang H, *et al.* Comparison of two nutrition assessment tools in  
5 surgical elderly inpatients in Northern China. *Nutr J.* 2015;14:68.
- 6 36. Cabrerizo S, Cuadras D, Gomez-Busto F, *et al.* Serum albumin and health in older  
7 people: Review and meta analysis. *Maturitas.* 2015;81:17-27.
- 8 37. O'Daly BJ, Walsh JC, Quinlan JF, *et al.* Serum albumin and total lymphocyte count  
9 as predictors of outcome in hip fractures. *Clin Nutr.* 2010;29:89-93.
- 10 38. Chiu PF, Tsai CC, Wu CL, *et al.* Trajectories of Serum Albumin Predict Survival of  
11 Peritoneal Dialysis Patients: A 15-year Follow-Up Study. *Medicine (Baltimore).*  
12 2016;95:e3202.
- 13 39. Covinsky KE, Covinsky MH, Palmer RM, *et al.* Serum albumin concentration and  
14 clinical assessments of nutritional status in hospitalized older people: different sides  
15 of different coins? *Journal of the American Geriatrics Society.* 2002;50:631-7.
- 16 40. Carriere I, Dupuy AM, Lacroux A, *et al.* Biomarkers of inflammation and  
17 malnutrition associated with early death in healthy elderly people. *Journal of the*  
18 *American Geriatrics Society.* 2008;56:840-6.
- 19 41. Devoto G, Gallo F, Marchello C, *et al.* Prealbumin serum concentrations as a useful  
20 tool in the assessment of malnutrition in hospitalized patients. *Clinical chemistry.*  
21 2006;52:2281-5.
- 22 42. Langkamp-Henken B, Hudgens J, Stechmiller JK, *et al.* Mini nutritional assessment  
23 and screening scores are associated with nutritional indicators in elderly people with  
24 pressure ulcers. *J Am Diet Assoc.* 2005;105:1590-6.
- 25 43. Kanda M, Mizuno A, Tanaka C, *et al.* Nutritional predictors for postoperative short-  
26 term and long-term outcomes of patients with gastric cancer. *Medicine (Baltimore).*  
27 2016;95:e3781.
- 28 44. Vellas B, Guigoz Y, Baumgartner M, *et al.* Relationships between nutritional markers  
29 and the mini-nutritional assessment in 155 older persons. *Journal of the American*  
30 *Geriatrics Society.* 2000;48:1300-9.
- 31 45. Lopez-Hellin J, Baena-Fustegueras JA, Schwartz-Riera S, *et al.* Usefulness of short-  
32 lived proteins as nutritional indicators surgical patients. *Clin Nutr.* 2002;21:119-25.
- 33 46. Wham CA, Teh RO, Robinson M, *et al.* What is associated with nutrition risk in very  
34 old age? *J Nutr Health Aging.* 2011;15:247-51.
- 35 47. Weng CH, Hsu CW, Hu CC, *et al.* Association Between Hemodiafiltration and  
36 Hypoalbuminemia in Middle-Age Hemodialysis Patients. *Medicine (Baltimore).*  
37 2016;95:e3334.
- 38 48. Lei Z, Qingyi D, Feng G, *et al.* Clinical study of mini-nutritional assessment for older  
39 Chinese inpatients. *J Nutr Health Aging.* 2009;13:871-5.
- 40 49. Antaki F, French MM, Moonka DK, *et al.* Bioelectrical impedance analysis for the  
41 evaluation of hepatic fibrosis in patients with chronic hepatitis C infection. *Dig Dis*  
42 *Sci.* 2008;53:1957-60.
- 43 50. Roongpisuthipong C, Sobhonslidsuk A, Nantiruj K, *et al.* Nutritional assessment in  
44  
45  
46  
47  
48  
49  
50  
51  
52  
53  
54  
55  
56  
57  
58  
59  
60

- 1  
2  
3 various stages of liver cirrhosis. *Nutrition*. 2001;17:761-5.  
4  
5 51. Akinyemiju T, Meng Q, Vin-Raviv N. Association between body mass index and in-  
6 hospital outcomes: Analysis of the nationwide inpatient database. *Medicine*  
7 *(Baltimore)*. 2016;95:e4189.  
8  
9 52. Drescher T, Singler K, Ulrich A, *et al*. Comparison of two malnutrition risk screening  
10 methods (MNA and NRS2002) and their association with markers of protein  
11 malnutrition in geriatric hospitalized patients. *Eur J Clin Nutr*. 2010;64:887-93.  
12  
13 53. Norman K, Pichard C, Lochs H, *et al*. Prognostic impact of disease-related  
14 malnutrition. *Clin Nutr*. 2008;27:5-15.  
15  
16 54. Bauer JM, Vogl T, Wicklein S, *et al*. Comparison of the Mini Nutritional Assessment,  
17 Subjective Global Assessment, and Nutritional Risk Screening (NRS 2002) for  
18 nutritional screening and assessment in geriatric hospital patients. *Z Gerontol Geriatr*.  
19 2005;38:322-7.  
20  
21 55. Cederholm T, Bosaeus I, Barazzoni R, *et al*. Diagnostic criteria for malnutrition - An  
22 ESPEN Consensus Statement. *Clin Nutr*. 2015;34:335-40.  
23  
24  
25  
26  
27  
28  
29  
30  
31  
32  
33  
34  
35  
36  
37  
38  
39  
40  
41  
42  
43  
44  
45  
46  
47  
48  
49  
50  
51  
52  
53  
54  
55  
56  
57  
58  
59  
60

**Table 1** Characteristic of study participants

| Variable                                        | All subjects (n=425)  |
|-------------------------------------------------|-----------------------|
| Age (year)                                      | 81.2±5.9 (70-98)      |
| Gender                                          |                       |
| Male                                            | 68.9% (293)           |
| Female                                          | 31.1% (132)           |
| Height (m)                                      | 1.6±0.1 (1.4-1.8)     |
| Weight (kg)                                     | 62.9±11.5 (28.4-92.0) |
| Body mass index (kg/m <sup>2</sup> )            | 23.2±3.7 (11.1-34.1)  |
| Length of hospital stay (day)                   | 21.9±13.8 (4-133)     |
| Primary cause of admission to hospital          |                       |
| Cardiac disease                                 | 160 (37.6%)           |
| Pulmonary infection                             | 84 (19.8%)            |
| Hypertension                                    | 76 (17.9%)            |
| Cerebrovascular disease                         | 45 (10.6%)            |
| Digestive disease                               | 25 (5.9%)             |
| Malignancy                                      | 19 (4.5%)             |
| Others                                          | 16 (3.8%)             |
| Comorbidities                                   |                       |
| Hypertension                                    | 210 (49.4%)           |
| Diabetes mellitus                               | 101 (23.8%)           |
| Cardiac disease (including atrial fibrillation) | 94 (22.1%)            |
| Cerebrovascular disease                         | 30 (7.1%)             |

Values are mean ± standard deviation (with ranges in brackets) or % (numbers), respectively.

**Table 2** Nutritional status (% , n) of 425 patients classified by NRS2002, MNA, BMI and serum parameters

|             | <b>Under-nourished</b> | <b>Well-nourished</b> |
|-------------|------------------------|-----------------------|
| NRS2002     | 40.9% (174)            | 59.1% (251)           |
| MNA         | 58.6% (249)            | 41.4% (176)           |
| BMI         | 23.7% (93)             | 76.3% (300)           |
| ALB         | 28.7% (122)            | 71.3% (303)           |
| PAB         | 47.3% (70)             | 52.7% (78)            |
| Hb (male)   | 41.7% (121)            | 58.3% (169)           |
| Hb (female) | 25.6% (33)             | 74.4% (96)            |
| TLC         | 35.9% (149)            | 64.1% (266)           |

ALB = albumin, BMI = Body mass index, Hb = hemoglobin, MNA = Mini-Nutritional Assessment, NRS2002 = Nutritional Risk Screening 2002, PAB = prealbumin, TLC = total lymphocyte count. Under-nourished (malnourished + at risk of malnutrition).

**Table 3** Cross-classification

| MNA             | NRS2002         |                | Total |
|-----------------|-----------------|----------------|-------|
|                 | Under-nourished | Well-nourished |       |
| Under-nourished | 159             | 90             | 249   |
| Well-nourished  | 15              | 161            | 176   |
| Total           | 174             | 251            | 425   |
| Kappa           | 0.521           |                |       |
| <i>P</i>        | <0.001          |                |       |

Number of patients classified into two categories according to MNA and NRS2002, respectively. MNA = Mini-Nutritional assessment, NRS2002 = Nutritional risk score 2002. Under-nourished: malnutrition + at risk of malnutrition.

**Table 4** Pearson correlation coefficients of MNA and NRS2002 scores with BMI, serum parameters and LOS

|         | MNA      |          | NRS2002  |          |
|---------|----------|----------|----------|----------|
|         | <i>r</i> | <i>p</i> | <i>r</i> | <i>p</i> |
| Age     | -0.239   | <0.001   | 0.238    | <0.001   |
| BMI     | 0.578    | <0.001   | -0.347   | <0.001   |
| Hb      | 0.387    | <0.001   | -0.321   | <0.001   |
| TLC     | -0.002   | 0.966    | 0.011    | 0.819    |
| ALB     | 0.501    | <0.001   | -0.383   | <0.001   |
| PAB     | 0.481    | <0.001   | -0.332   | <0.001   |
| LOS     | -0.109   | 0.048    | 0.178    | 0.001    |
| NRS2002 | -0.640   | <0.001   | —        | —        |

ALB = albumin, BMI = body mass index, Hb = hemoglobin, LOS = length of hospital stay, MNA = Mini-Nutritional Assessment, NRS2002 = Nutritional Risk Screening 2002, PAB = prealbumin, TLC = total lymphocyte count.



**Table 5** The simple linear regression analysis of LOS

|         | B      | SE    | $\beta$ | t      | P     | 95%CI         | R <sup>2</sup> | F      |
|---------|--------|-------|---------|--------|-------|---------------|----------------|--------|
| MNA     | -0.261 | 0.131 | -0.109  | -1.987 | <0.05 | -0.519,-0.003 | 0.012          | 3.949  |
| NRS2002 | 1.891  | 0.575 | 0.178   | 3.291  | <0.01 | 0.761,3.022   | 0.032          | 10.834 |

LOS = length of hospital stay, CI = confidence interval, MNA = Mini-Nutritional Assessment, NRS2002=Nutritional Risk Screening 2002.

For peer review only

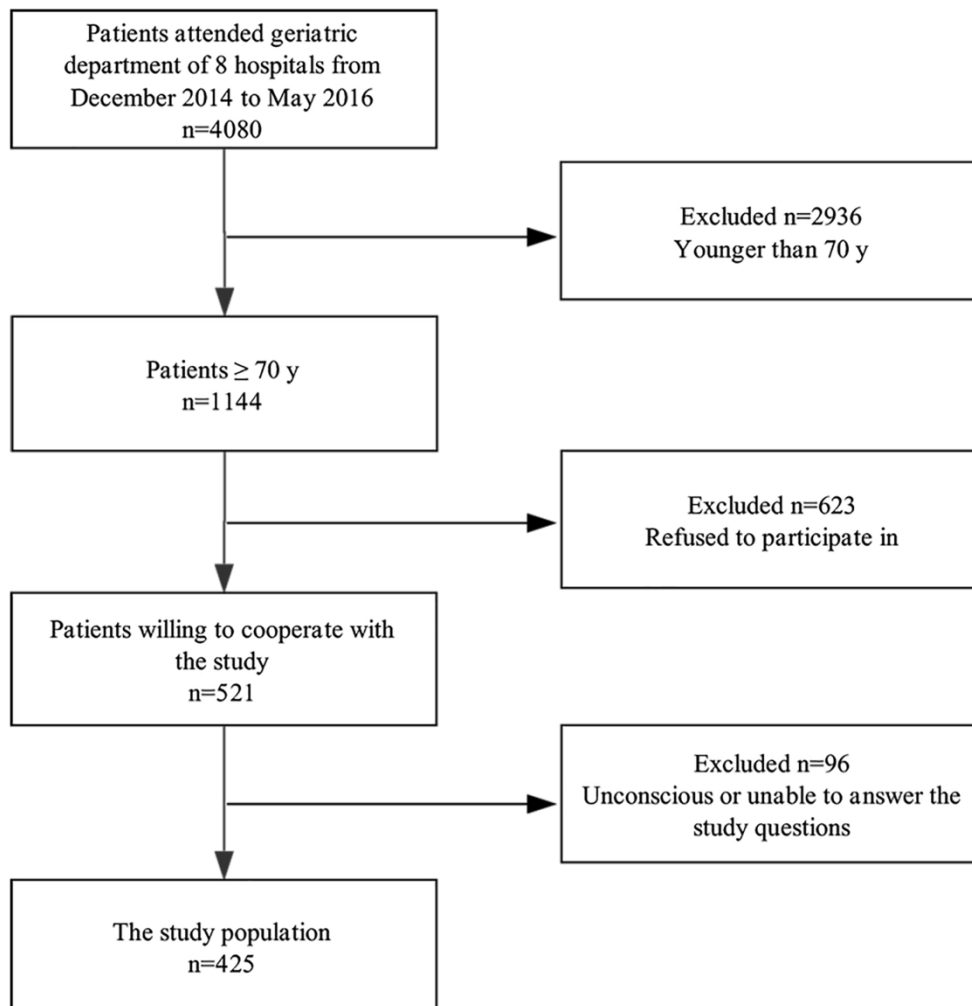

Figure 1 Flow diagram of participant inclusion and exclusion.

167x172mm (300 x 300 DPI)

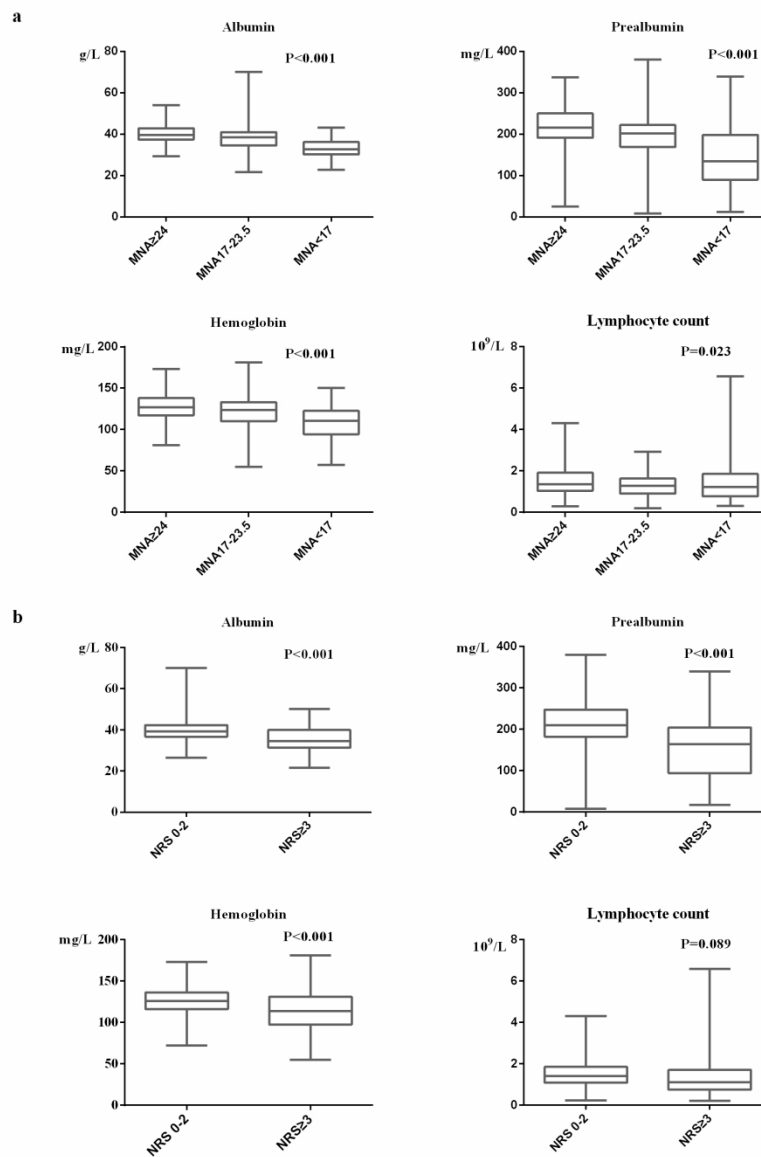

Figure 2 MNA (a) and NRS2002 (b) referring to serum albumin, prealbumin, hemoglobin and blood lymphocytes count respectively.

175x262mm (300 x 300 DPI)

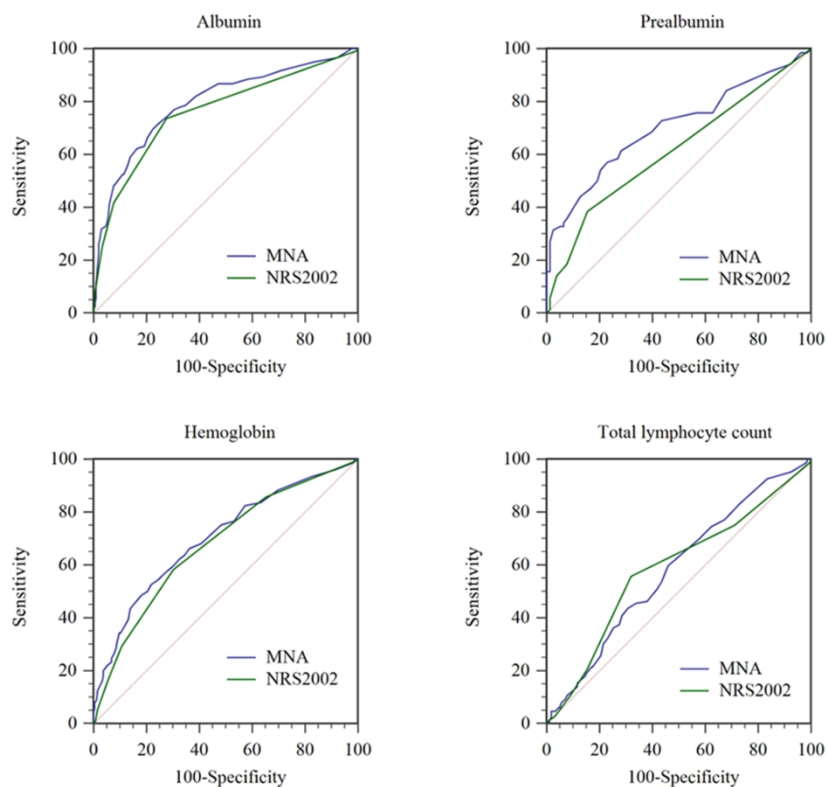

Figure 3 Receiver operating characteristics of sensitivity and specificity of predicted probabilities for nutritional risk incorporating the MNA score or the NRS2002 score.

170x139mm (300 x 300 DPI)

**Additional Table 1** Nutritional parameters of study participants classified by MNA and NRS2002

|                | ALB (g/L)               | PAB (mg/L)             | Hb (g/L)                 | TLC ( $10^9/L$ )     |
|----------------|-------------------------|------------------------|--------------------------|----------------------|
| <b>MNA</b>     |                         |                        |                          |                      |
| <17            | 33.3±4.8<br>(22.8-43.2) | 140.8±81.7<br>(12-339) | 109.0±20.8<br>(57-150.2) | 1.5±1.2<br>(0.3-6.6) |
| 17-23.5        | 37.9±5.6<br>(21.6-70)   | 192.3±61.8<br>(8-380)  | 120.2±22.0<br>(55-181)   | 1.3±0.6<br>(0.2-2.9) |
| ≥24            | 39.8±3.8<br>(29.3-54)   | 216.7±54.4<br>(25-337) | 127.6±15.3<br>(81-173)   | 1.5±0.7<br>(0.3-4.3) |
| <b>NRS2002</b> |                         |                        |                          |                      |
| ≥3             | 35.1±5.6<br>(21.6-50.2) | 148.5±79.3<br>(17-339) | 113.3±23.6<br>(55-181)   | 1.4±1.0<br>(0.2-6.6) |
| 0-2            | 39.4±4.5<br>(26.4-70)   | 210.2±56.1<br>(8-380)  | 125.8±16.2<br>(72-173)   | 1.5±0.6<br>(0.2-4.3) |

ALB = albumin, PAB = prealbumin, Hb = hemoglobin, TLC = total lymphocyte count, MNA = Mini-Nutritional Assessment, NRS2002=Nutritional Risk Screening 2002.

Values are mean ± standard deviation (with ranges in brackets)

**STROBE Statement**

## Checklist of items that should be included in reports of observational studies

| Section/Topic             | Item No | Recommendation                                                                                                                                                                             | Reported on Page No |
|---------------------------|---------|--------------------------------------------------------------------------------------------------------------------------------------------------------------------------------------------|---------------------|
| <b>Title and abstract</b> | 1       | (a) Indicate the study's design with a commonly used term in the title or the abstract                                                                                                     | 1-3                 |
|                           |         | (b) Provide in the abstract an informative and balanced summary of what was done and what was found                                                                                        | 2-3                 |
| <b>Introduction</b>       |         |                                                                                                                                                                                            |                     |
| Background/rationale      | 2       | Explain the scientific background and rationale for the investigation being reported                                                                                                       | 4-5                 |
| Objectives                | 3       | State specific objectives, including any prespecified hypotheses                                                                                                                           | 5                   |
| <b>Methods</b>            |         |                                                                                                                                                                                            |                     |
| Study design              | 4       | Present key elements of study design early in the paper                                                                                                                                    | 6                   |
| Setting                   | 5       | Describe the setting, locations, and relevant dates, including periods of recruitment, exposure, follow-up, and data collection                                                            | 6-8                 |
| Participants              | 6       | (a) <i>Cohort study</i> —Give the eligibility criteria, and the sources and methods of selection of participants. Describe methods of follow-up                                            | 6                   |
|                           |         | <i>Case-control study</i> —Give the eligibility criteria, and the sources and methods of case ascertainment and control selection. Give the rationale for the choice of cases and controls |                     |
|                           |         | <i>Cross-sectional study</i> —Give the eligibility criteria, and the sources and methods of selection of participants                                                                      |                     |
| Variables                 | 7       | (b) <i>Cohort study</i> —For matched studies, give matching criteria and number of exposed and unexposed                                                                                   | NA                  |
|                           |         | <i>Case-control study</i> —For matched studies, give matching criteria and the number of controls per case                                                                                 |                     |
|                           |         | Clearly define all outcomes, exposures, predictors, potential confounders, and effect modifiers. Give diagnostic criteria, if applicable                                                   | 7-8                 |
| Data sources/measurement  | 8*      | For each variable of interest, give sources of data and details of methods of assessment (measurement). Describe comparability of assessment methods if there is more than one group       | 8                   |
| Bias                      | 9       | Describe any efforts to address potential sources of bias                                                                                                                                  | 7                   |
| Study size                | 10      | Explain how the study size was arrived at                                                                                                                                                  | 6                   |
| Quantitative variables    | 11      | Explain how quantitative variables were handled in the analyses. If applicable, describe which groupings were chosen and why                                                               | 9                   |
| Statistical methods       | 12      | (a) Describe all statistical methods, including those used to control for confounding                                                                                                      | 9                   |
|                           |         | (b) Describe any methods used to examine subgroups and interactions                                                                                                                        | 9                   |
|                           |         | (c) Explain how missing data were addressed                                                                                                                                                | NA                  |
|                           |         | (d) <i>Cohort study</i> —If applicable, explain how loss to follow-up was addressed                                                                                                        | NA                  |
|                           |         | <i>Case-control study</i> —If applicable, explain how matching of cases and controls was addressed                                                                                         |                     |
|                           |         | <i>Cross-sectional study</i> —If applicable, describe analytical methods taking account of sampling strategy                                                                               |                     |
|                           |         | (e) Describe any sensitivity analyses                                                                                                                                                      | 9                   |

| Section/Topic            | Item No | Recommendation                                                                                                                                                                                               | Reported on Page No |
|--------------------------|---------|--------------------------------------------------------------------------------------------------------------------------------------------------------------------------------------------------------------|---------------------|
| <b>Results</b>           |         |                                                                                                                                                                                                              |                     |
| Participants             | 13*     | (a) Report numbers of individuals at each stage of study—eg numbers potentially eligible, examined for eligibility, confirmed eligible, included in the study, completing follow-up, and analysed            | 9                   |
|                          |         | (b) Give reasons for non-participation at each stage                                                                                                                                                         | Figure 1            |
|                          |         | (c) Consider use of a flow diagram                                                                                                                                                                           | Figure 1            |
| Descriptive data         | 14*     | (a) Give characteristics of study participants (eg demographic, clinical, social) and information on exposures and potential confounders                                                                     | 9                   |
|                          |         | (b) Indicate number of participants with missing data for each variable of interest                                                                                                                          | NA                  |
|                          |         | (c) <i>Cohort study</i> —Summarise follow-up time (eg, average and total amount)                                                                                                                             | NA                  |
| Outcome data             | 15*     | <i>Cohort study</i> —Report numbers of outcome events or summary measures over time                                                                                                                          | NA                  |
|                          |         | <i>Case-control study</i> —Report numbers in each exposure category, or summary measures of exposure                                                                                                         | NA                  |
|                          |         | <i>Cross-sectional study</i> —Report numbers of outcome events or summary measures                                                                                                                           | 9                   |
| Main results             | 16      | (a) Give unadjusted estimates and, if applicable, confounder-adjusted estimates and their precision (eg, 95% confidence interval). Make clear which confounders were adjusted for and why they were included | NA                  |
|                          |         | (b) Report category boundaries when continuous variables were categorized                                                                                                                                    | 10-12               |
|                          |         | (c) If relevant, consider translating estimates of relative risk into absolute risk for a meaningful time period                                                                                             | NA                  |
| Other analyses           | 17      | Report other analyses done—eg analyses of subgroups and interactions, and sensitivity analyses                                                                                                               | 10-12               |
| <b>Discussion</b>        |         |                                                                                                                                                                                                              |                     |
| Key results              | 18      | Summarise key results with reference to study objectives                                                                                                                                                     | 16                  |
| Limitations              | 19      | Discuss limitations of the study, taking into account sources of potential bias or imprecision. Discuss both direction and magnitude of any potential bias                                                   | 16                  |
| Interpretation           | 20      | Give a cautious overall interpretation of results considering objectives, limitations, multiplicity of analyses, results from similar studies, and other relevant evidence                                   | 13-16               |
| Generalisability         | 21      | Discuss the generalisability (external validity) of the study results                                                                                                                                        | 16                  |
| <b>Other Information</b> |         |                                                                                                                                                                                                              |                     |
| Funding                  | 22      | Give the source of funding and the role of the funders for the present study and, if applicable, for the original study on which the present article is based                                                | 17                  |

\*Give information separately for cases and controls in case-control studies and, if applicable, for exposed and unexposed groups in cohort and cross-sectional studies.

**Note:** An Explanation and Elaboration article discusses each checklist item and gives methodological background and published examples of transparent reporting. The STROBE checklist is best used in conjunction with this article (freely available on the Web sites of PLoS Medicine at <http://www.plosmedicine.org/>, Annals of Internal Medicine at <http://www.annals.org/>, and Epidemiology at <http://www.epidem.com/>). Information on the STROBE Initiative is available at [www.strobe-statement.org](http://www.strobe-statement.org).
