# Supplementary material for: Comparison of two malnutrition risk screening tools with nutritional biochemical parameters, BMI and length of stay in Chinese geriatric inpatients: a multicenter, cross-sectional study
Source: PubMed Central journal article supplement — BMJ Open. 2019 Feb 8;9(2):e022993. doi: 10.1136/bmjopen-2018-022993 (PMC6411257; doi:10.1136/bmjopen-2018-022993), 2019-02-08
Supplement: bmjopen-2018-022993supp001.pdf [file bmjopen-2018-022993supp001.pdf]

**Additional Table 1** Nutritional parameters of study participants classified by MNA and NRS2002

|         | ALB (g/L)               | PAB (mg/L)             | Hb (g/L)                 | TLC ( $10^9/L$ )     |
|---------|-------------------------|------------------------|--------------------------|----------------------|
| MNA     |                         |                        |                          |                      |
| <17     | 33.3±4.8<br>(22.8-43.2) | 140.8±81.7<br>(12-339) | 109.0±20.8<br>(57-150.2) | 1.5±1.2<br>(0.3-6.6) |
| 17-23.5 | 37.9±5.6<br>(21.6-70)   | 192.3±61.8<br>(8-380)  | 120.2±22.0<br>(55-181)   | 1.3±0.6<br>(0.2-2.9) |
| ≥24     | 39.8±3.8<br>(29.3-54)   | 216.7±54.4<br>(25-337) | 127.6±15.3<br>(81-173)   | 1.5±0.7<br>(0.3-4.3) |
| NRS2002 |                         |                        |                          |                      |
| ≥3      | 35.1±5.6<br>(21.6-50.2) | 148.5±79.3<br>(17-339) | 113.3±23.6<br>(55-181)   | 1.4±1.0<br>(0.2-6.6) |
| 0-2     | 39.4±4.5<br>(26.4-70)   | 210.2±56.1<br>(8-380)  | 125.8±16.2<br>(72-173)   | 1.5±0.6<br>(0.2-4.3) |

ALB = albumin, PAB = prealbumin, Hb = hemoglobin, TLC = total lymphocyte count, MNA = Mini-Nutritional Assessment, NRS2002=Nutritional Risk Screening 2002. Values are mean ± standard deviation (with ranges in brackets)
